# Supplementary material
Source: PubMed Central journal article supplement (PMC5293017)
Supplement: pnas.1616248114.sapp.pdf [file pnas.1616248114.sapp.pdf]

## SUPPORTING INFORMATION (SI) APPENDIX

### Multi-institute analysis of carbapenem resistance reveals remarkable diversity, unexplained mechanisms and limited clonal outbreaks

#### SI TEXT

##### Comparison of mechanisms identified in the prospective collection and those observed in a retrospective collection of 48 CRE collected from 2007-2012.

We sequenced a collection of 48 CRE isolated from patients at the same three Boston area hospitals in the six years prior (2007-2012) to the prospective sampling period (Table S1). Though this was not a comprehensive sample of CRE diversity at these hospitals over this time period, these isolates allowed us to compare historical strains and resistance determinants with those isolated more recently.

The historical collection comprised the three most common species that were recorded in the prospective collection (*E. coli*, *K. pneumoniae* and *E. cloacae*). Three out of the four most frequent non-susceptible STs from the Boston Prospective Collection were among the four most frequent non-susceptible STs in the Boston Historical Collection, including *K. pneumoniae* ST258, which was the most frequently isolated ST in both sets (35% and 33% of historical and prospective collection, respectively) (Table S3).

The diversity and frequency of resistance determinants among the historical collection was similar to that of the prospective collection (Tables S1 and S4); *bla*<sub>KPC</sub> was the most prevalent genetic determinant of meropenem resistance with *bla*<sub>KPC-3</sub> alleles being the most frequently observed followed by *bla*<sub>KPC-2</sub> and *bla*<sub>KPC-4</sub>. We observed only one strain carrying *bla*<sub>NDM-1</sub>, which was isolated from a patient in 2009. Though the species carrying the *bla*<sub>NDM-1</sub> gene differed between its appearance in 2009 (*E. cloacae*) and 2013 (*K. pneumoniae*), both strains were isolated from the same hospital. The only unique genetic determinant among the historical collection was *bla*<sub>OXA-48</sub>, a less commonly reported beta-lactamase, which is found predominantly in North Africa and Europe<sup>14</sup>. This gene was observed in only one *K. pneumoniae* ST101 strain isolated in November 2011 - five months prior to the first report of *bla*<sub>OXA-48</sub> in the United States<sup>49</sup>. No strains from the historical collection were found to encode truncated forms of porins with or without other beta-lactamases, this fact could be either the result or the reason why historical collection being biased toward highly resistant isolates (the median meropenem MIC for the historical and prospective collections were  $\geq 16$   $\mu\text{g}/\text{mL}$  and  $\geq 8$   $\mu\text{g}/\text{mL}$ , respectively). Strains harboring porin mutations had lower meropenem resistance ranging in their MICs from  $\geq 2$  to  $\geq 8$   $\mu\text{g}/\text{mL}$ .

#### SI MATERIALS AND METHODS

**Specimen collection and phenotypic assessment.** Meropenem resistant Enterobacteriaceae isolated from patients from four hospitals over a 16-month period (August 2012 through November 2013) were collected for genome sequencing. Species- and date-matched carbapenem susceptible controls, when available, were also collected. Three participating hospitals were located in Boston, Massachusetts, between 0.5-3 miles (0.8-4.8 kilometers) apart from one another (Boston Prospective Collection). The other participating hospital was located in Irvine, California, which is located  $\sim 3,000$  miles ( $\sim 4,828$  kilometers) from Boston (Irvine Prospective Collection). Isolates were cultured in each hospital's respective microbiology lab from patient

specimens sent for routine clinical management. Blood culture isolates were obtained using the BD BACTEC 9240 or BACTEC FX systems. Other isolates were cultured directly from clinical specimens by plating onto standard bacterial culture medium. In the case of multiple isolates from the same patient during a single admission, only the earliest collection was submitted for sequencing except in two cases when two isolates from the same patient were sequenced (BIDMC\_43A, BIDMC\_43B and BIDMC\_42A, BIDMC\_42B). Organism identification and susceptibility testing were performed using the bioMérieux Vitek 2. Carbapenem susceptibility was defined based on an *in vitro* MIC to meropenem:  $\geq 2$  ug/mL was considered non-susceptible with isolates having MIC below this threshold considered susceptible.

For historical context and comparison, carbapenem resistant bacteria that had been sporadically archived from three Boston-area hospitals between 2006 and 2012 were also selected for sequencing (Historical Collection). Strains from the Historical Collection were tested for carbapenem susceptibility by disk diffusion. Strains were then tested for presumptive carbapenemase activity by modified Hodge test per CLSI guidelines, and, if confirmed, the MIC was determined by manual micro broth dilution. A full list of isolates and characteristics is provided in Table S1 and summarized in Table S2.

**DNA extraction.** Bacterial DNA was extracted using either the BioRobot EZ1 or the QiaSymphony AS (Qiagen). For the BioRobot EZ1 extractions, the bacterial protocol using the EZ1 DNA Tissue Kit was followed and the DNA was extracted according to the specifications provided by the EZ1 DNA Bacterial Card. For the QiaSymphony DNA extractions, one bacterial colony was suspended in 400 mL of lysis buffer containing 180 mL of Qiagen P1 buffer, 20 mL of Qiagen PK and 200 mL of Qiagen AL buffer. The tube was vortexed for 1 minute and incubated at 56°C for 30 minutes and then at 95°C for 10 minutes. The tube was loaded onto the QiaSymphony. Bacterial DNA was extracted using the DSP Midi Virus/Pathogen Kit and the DSP Complex 400 Default IC protocol.

**Library preparation and genome sequencing.** Two Illumina sequencing libraries were prepared as previously described (1). Libraries were 101 bp, paired-end sequenced using the HiSeq2000 platform to achieve 100-200-fold coverage. Seven isolates were also selected for sequencing via the Pacific Bioscience RS platform: BIDMC\_12C, BIDMC\_16, BIDMC\_19C, BIDMC\_18C, MGH\_8, MGH\_14 and BWH\_24. Libraries were prepared as previously described (2) and sequenced and analyzed on the PacBio-RS instrument (version 2 chemistry and 2.0.1 analysis software) following manufacturer's recommendations. The sequencing yielded ~10 KB reads, on average, at approximately 100x (range of 90x-146x) genome coverage.

**Assembly.** Data were assembled using ALLPATHS-LG (3) with the reference assisting option. Base call correction was performed by Pilon (4) according to BWA (5) read alignment. Potential mis-assemblies were manually corrected. Final assemblies were produced by post-assembly scaffolding using SSPACE (6) followed by a second round of assembly improvement using Pilon. The scaffolding consists of estimating the distance between contiguous sequences (contigs) and defines their relative order and orientation based on paired-end reads that are assigned to different contigs but derived from the same jumping library clone. Paired-end reads are reads derived from the insert ends of the same library clone. Jumping library clones contain the DNA from two fragments 3-5 Kb apart in the genome, which significantly improves the

assembly of genomes and are critical in the resolution of repetitive regions. Strains sequenced with PacBio were assembled using HGAP (7). The accuracy of assemblies obtained by a second round of scaffolding using SSPACE was evaluated by comparing SSPACE assemblies to PacBio assemblies from the same strain. An average accuracy was estimated by dividing the number of correct joins by the total number of joins performed on all seven isolates (Table S10). SSPACE, like the scaffolding module embedded in ALLPATHS-LG, attempts to resolve contradictory assembly hypotheses by analysing the number and nature of paired-ends reads supporting each alternative. The SSPACE approach is less conservative, generating scaffolds in cases where ALLPATHS-LG will report separate and disconnected contigs.

**Annotation.** Protein-coding gene predictions were made by Prodigal (8). rRNA loci were predicted by RNAmmer (9), and tRNA by tRNAscan-SE (10). Protein-coding genes with 70% overlap with non-coding genes were filtered out. Gene product names were assigned based on BLAST best hit (E-value < 1e-10) against the following reference databases in the following order of precedence: curated set of *E. coli* virulence proteins (only *E. coli* assemblies; >= 60% identity and query coverage), Swiss-Prot (11) (>=70% identity and query coverage for *E. coli*; >= 60% for others), TIGRFam (12), *E. coli* K-12 MG1655 proteins (in-house sequence and annotation) and *E. coli* UTI89 (GenBank accession: NC\_007946.1, NC\_007941.1) proteins (only *E. coli* assemblies; >= 60% identity and query coverage), *K. pneumoniae* MGH 78578 (GenBank accession: NC\_009648.1, NC\_009649.1, NC\_009650.1, NC\_009651.1, NC\_009652.1, NC\_009653.1) proteins (only *K. pneumoniae* assemblies; >= 60% identity and query coverage) and *E. cloacae* ATCC 13047 (GenBank accession: NC\_014121.1, NC\_014107.1, NC\_014108.1) proteins (only *E. cloacae* assemblies; >= 60% identity and query coverage). Genes without a match to any database had their product name defined as “hypothetical protein.” These annotations were submitted to NCBI. Genes were also functionally re-annotated for secondary analysis of resistance genes based on BLAST searches against four databases: i) an internal custom-made database of genes encoding porins and beta-lactamases, including carbapenamases; ii) Resfinder (13); iii) genes with available sequences in the Lahey Clinic catalog of beta-lactamases (<http://www.lahey.org/Studies>) and (iv) ARDB (14). Gene names from best matches with e-value < 1e-10 with > 80% coverage of the database sequence were transferred. Matches against multiple genes in different databases were resolved by defining an order of precedence among databases, the same order in which those databases are listed above.

**Clustering orthologs and phylogenetic reconstruction.** Predicted genes were grouped into putative ortholog clusters using OrthoMCL 1.0 (15) using an inflation value of 1.5 and a E-value cutoff of 1e10<sup>-5</sup>. Genes conserved among isolates of each species and having one single copy per genome (single copy core) were concatenated and aligned using MUSCLE (16). For each species, phylogenetic reconstructions were generated using FastTree (17). Tree rendered by FigTree (18).

**Reconstruction of recombination-free phylogenetic ST258 strain tree.** Genomic sequences from all ST258 isolates and UCI\_17, a closely related ST437 isolate, were aligned using progressive Mauve (19), multiple whole-genome alignment algorithm. Conserved regions in the Mauve XMFA output alignment were converted to FASTA format, and Gubbins (20) was used to predict regions of recombination (parameters: '--filter\_percentage 60 --tree-builder raxml'). Gubbins intermediate trees were generated by RaxML (21). Putative sites of recombination were

removed from the alignment and a new phylogenetic tree was constructed for ST258 strains using FastTree (22). Tanglegram, a visual comparison of taxa position in two alternative trees, was rendered by Dendroscope (23).

***cps* gene analysis and clade classification.** ST258 isolates may be further divided on the basis of distinct and divergent capsular loci, which form *cps* clades I and II (Fig. S1 and Table S1). *wzy* reference sequences were downloaded from GenBank as proxies for capsular polysaccharide clades I and II (24, 25) (AHJ80448.1 and AHJ80492.1, respectively). The *wzy* sequences were BLAST (26) similarity searched against each assembly. Matches (e-value < 1e-10, > 80% coverage of *wzy* sequence length) from all strains were aligned with the reference sequences using MAFFT (27) and a phylogenetic tree was constructed using FastTree (22) and rendered by FigTree (18). *cps* clade designations were based on the relatedness to each reference *wzy* sequence.

**Plasmid identification.** To identify plasmids, each scaffold was BLAST similarity searched against the GenBank NT database from May 2014. The best BLAST hit to each scaffold was manually inspected and binned into one of five reference datasets: all plasmid sequences, all mobile element sequences and chromosomal reference sequences for each of *E. cloacae*, *E. coli*, and *K. pneumoniae*. Plasmid scaffolds were defined when >70% of scaffold length matched the plasmid reference dataset and < 30% matched to either mobile element or chromosomal sequences, according to MUMMER alignment (28), a whole-genome pairwise alignment algorithm. Reference plasmids having  $\geq 70\%$  overall coverage by scaffolds of one isolate were considered as present in that isolate. The estimated length of each plasmid was calculated as the sum of the length of all scaffolds associated with a specific reference plasmid. Incompatibility groups were defined based on greater than 94% identity to replicons in PlasmidFinder database (29). Similarity among plasmids was evaluated by MUMMER (28); alignments overall pairwise coverage, and identity were calculated by internal scripts and rendered as a heat map by the heatmap.2 function of gplots package, R (30). We compared results using our approach for BIMDC\_38, BWH\_24 and BIDMC\_20B to those reported by (31), which featured PLACNET, an alternative plasmid identification method. Eight of ten total predicted plasmids were found with both methods (Table S11).

**Transposon Tn4401 annotation.** Tn4401 sequences were identified by BLAT (32), a global-local (glocal) pairwise alignment algorithm; by aligning genomic sequences (local alignment) against the Tn4401 transposon sequence (global alignment) from plasmid pKPC\_FCF/3SP (GenBank accession NC\_021660.2 coordinates 27,541 to 37,544). Identified transposon sequences from each isolate were aligned using MAFFT (27) (parameters "--globalpair --maxiterate 16") and the Tn4401 phylogeny was reconstructed using FastTree (22) (default parameters). Tree rendered by FigTree (18). Transposons with gaps in the end of the multiple sequence alignment were considered 'truncated'. Only isoforms of the transposon present in more than one genome were annotated according to the appropriate nomenclature (33, 34). Isoforms not meeting this criterion were annotated as 'unique'. Copies of Tn4401b either carrying different variants of *bla*<sub>KPC</sub> or containing a single nucleotide substitution were considered as distinct Tn4401b subtypes. Fig. 3 was rendered using Circos (35). Site of integration of chromosome-encoded Tn4401 was examined by concatenating 5 KB regions flanking the transposon on both sides (10 Kb total). Flanking sequences were aligned in pairwise

fashion by MUMMER (28). Sequences with more than 90% coverage with 90% identity were considered as representing the same integration site. Two instances of chromosomal Tn4401 were located near scaffold breaks. In those cases only the available flanking region was evaluated. Manual inspection and Pilon (4) assisted evaluation of the alignment of UCI\_1 and UCI\_67 reads against their respective genomes revealed correct assembly of the 210 bp deletion in Tn4401 that we propose as Tn4401i. Specifically, we observed no significant deviation in the average read depth across the element or enrichment of paired-end reads with longer or shorter than expected mapping distances between reads. UCI\_1 and UCI\_67 reads were also aligned against the assembly of isolate BIDMC\_43B, which encodes isoform Tn4401b without the 210 bp deletion (Fig. S10). In this case and as expected, there were no reads spanning the region of 210 bp deletion, and paired-end reads flanking the deletion were mapped farther apart than expected based on the distribution of the insert size of the sequenced library. Alignments were performed using BWA-MEM (36) and visual inspection and figures were made using the Integrative Genomics Viewer (IGV) (37).

**Search for genetic determinants of meropenem resistance in strains having unexplained resistance.** Ortholog clusters containing genes from MGH\_31 or MGH\_59 predicted to be on plasmid scaffolds were identified. For each such cluster, the number of meropenem susceptible isolates contributing to that cluster was tallied, and clusters encoding “hypothetical proteins” were BLAST similarity searched against the NCBI non-redundant database (Table S7). Orthologs cluster containing genes from MGH\_31 or MGH\_59 that were either annotated as resistance genes (see SI Annotation section) or contained beta-lactamase domains according to similarity search against PFAM/TIGRFAM (38), in spite of their genomic location (chromosomal or plasmid), were also inspected (Table S9). BIDMC\_35 genes predicted as part of plasmid scaffolds were identified and BLAST similarity searched against the PFAM domain database (Table S8). Alternatively, sequencing reads from all isolates with unexplained resistance were aligned against a nucleotide database of antibiotic resistance genes (AR genes). AR genes were considered present in an isolate if the mean read depth of aligned reads was higher than a specific threshold (median – 2 \* standard deviation of the read depth of single copy genes in *K. pneumoniae*) and 60% of the AR gene was covered with aligned reads with a read depth above the same threshold. Results are shown in Table S12. For highly related families of AR genes (e.g., *bla*<sub>SHV</sub> family) the mapping results indicated the presence of multiple members even when a strain encoded only a single gene from that family.

**PCR validation for presence of specific loci.** The presence of *bla*<sub>KPC</sub> was verified in select strains by colony PCR using primers (5- GTCAGTGTATCGCCGTCTAGTTC and 5- CTCGAGCGCGAGTCTAGC). Sanger sequencing was used to confirm all amplification products. The *wzi* gene from BIDMC\_35 was amplified with primers 5- ATGATAAAAATTGCGCGCATTG and 5-CTAAATGGTATTTCAACCCCTGCG by colony PCR. Amplification resulted in a band with the expected length and Sanger sequencing confirmed that the *wzi* sequence was specific to BIDMC\_35. The *bla*<sub>OXA-10</sub> from BIDMC\_35 was amplified with primers 5- GCAACGATGTTACGCAGCAG and 5- GTTGAGTCGATACTTCGGCG by colony PCR. Amplification resulted in a band with the expected length and Sanger sequencing confirmed that the *bla*<sub>OXA-10</sub> sequence was specific to BIDMC\_35.

**Identifying plasmid-encoded resistance factors.** A meropenem susceptible *K. pneumoniae* strain was transformed with the plasmid content from MGH\_31 or MGH\_59 and a meropenem susceptible *E. coli* NEB10beta strain was transformed with plasmid content from BIDMC\_35 by electroporation. Meropenem susceptibility was determined by two-fold serial dilutions of meropenem in Mueller Hinton medium.

## SI FIGURES

Figure S1. **Phylogenetic tree based on multiple sequence alignment of *wzy* orthologs across all *Klebsiella* ST258 isolates.** The *wzy* gene encodes the capsular polysaccharide (*cps*) polymerase and is a proxy for *cps* clades I and II. The OTU AHJ80492.1 (red) is associated with *cps* clade I. The OTU AHJ80448.1 (blue) is associated with *cps* clade II (see Materials and Methods). No *wzy* orthologs were found in UCI\_22 and UCI\_61 and BIDMC\_18A. Branch length scale indicates the number of substitutions per site.

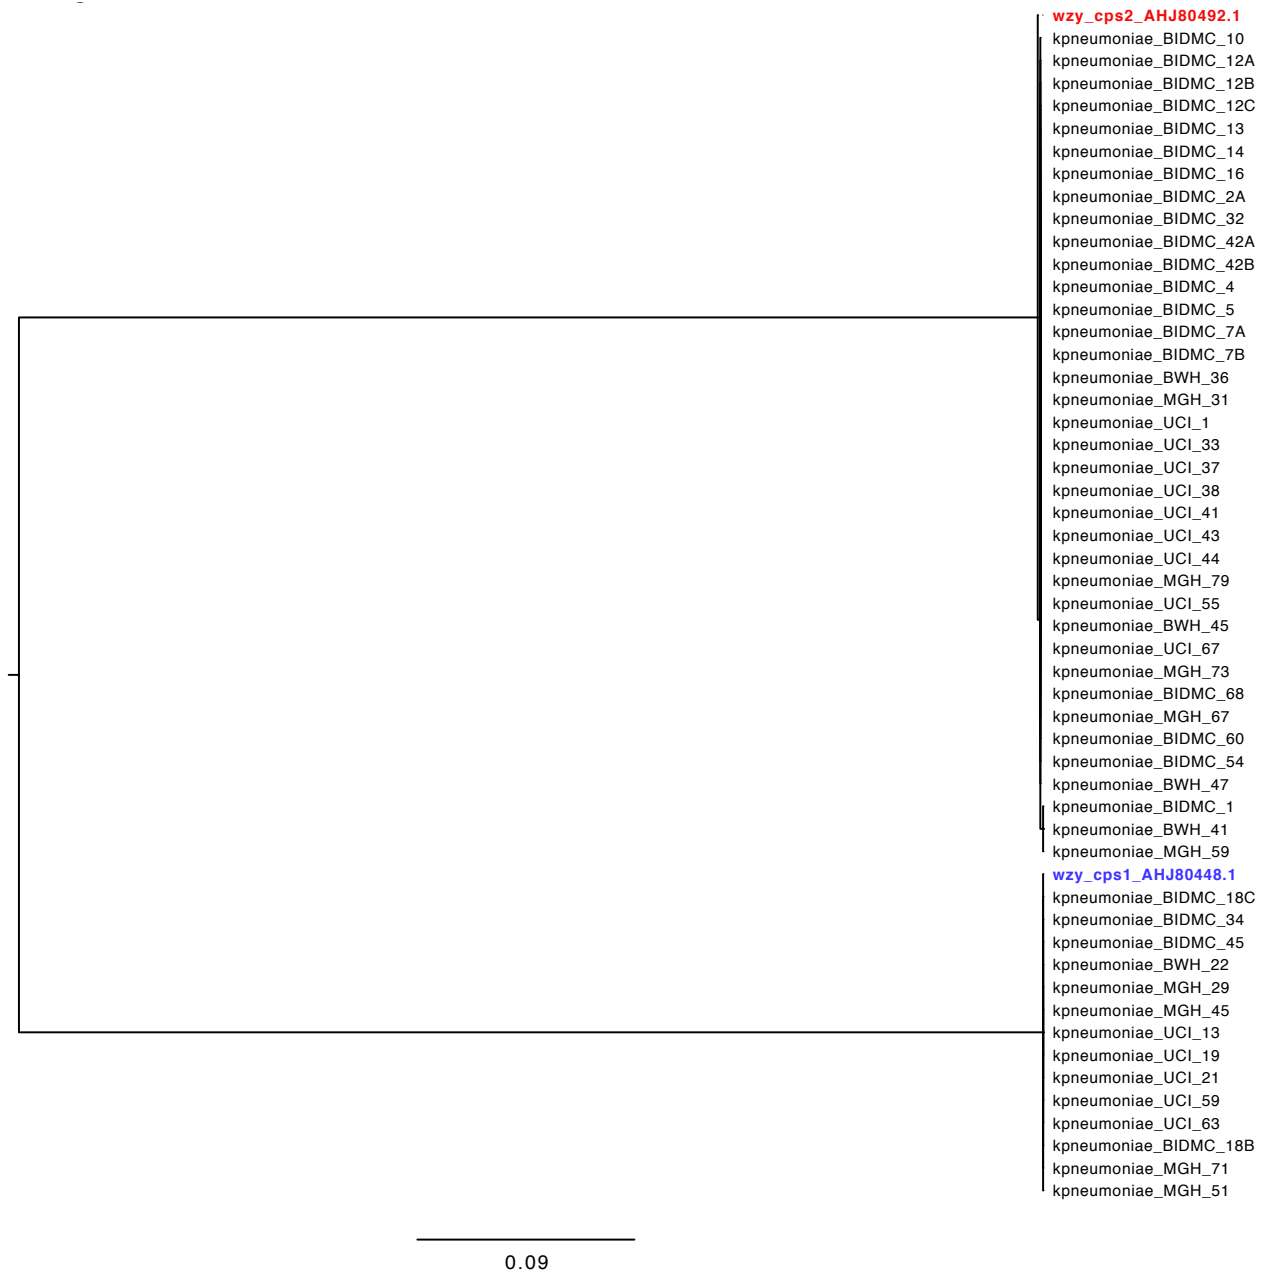

Figure S2. **Timeline of susceptible isolates.** Isolates are stratified based on species and MLST (vertical axis) and with respect to time of collection (horizontal axis). Shape of glyphs indicates the hospital from which each isolate was collected, according to the legend on the right.

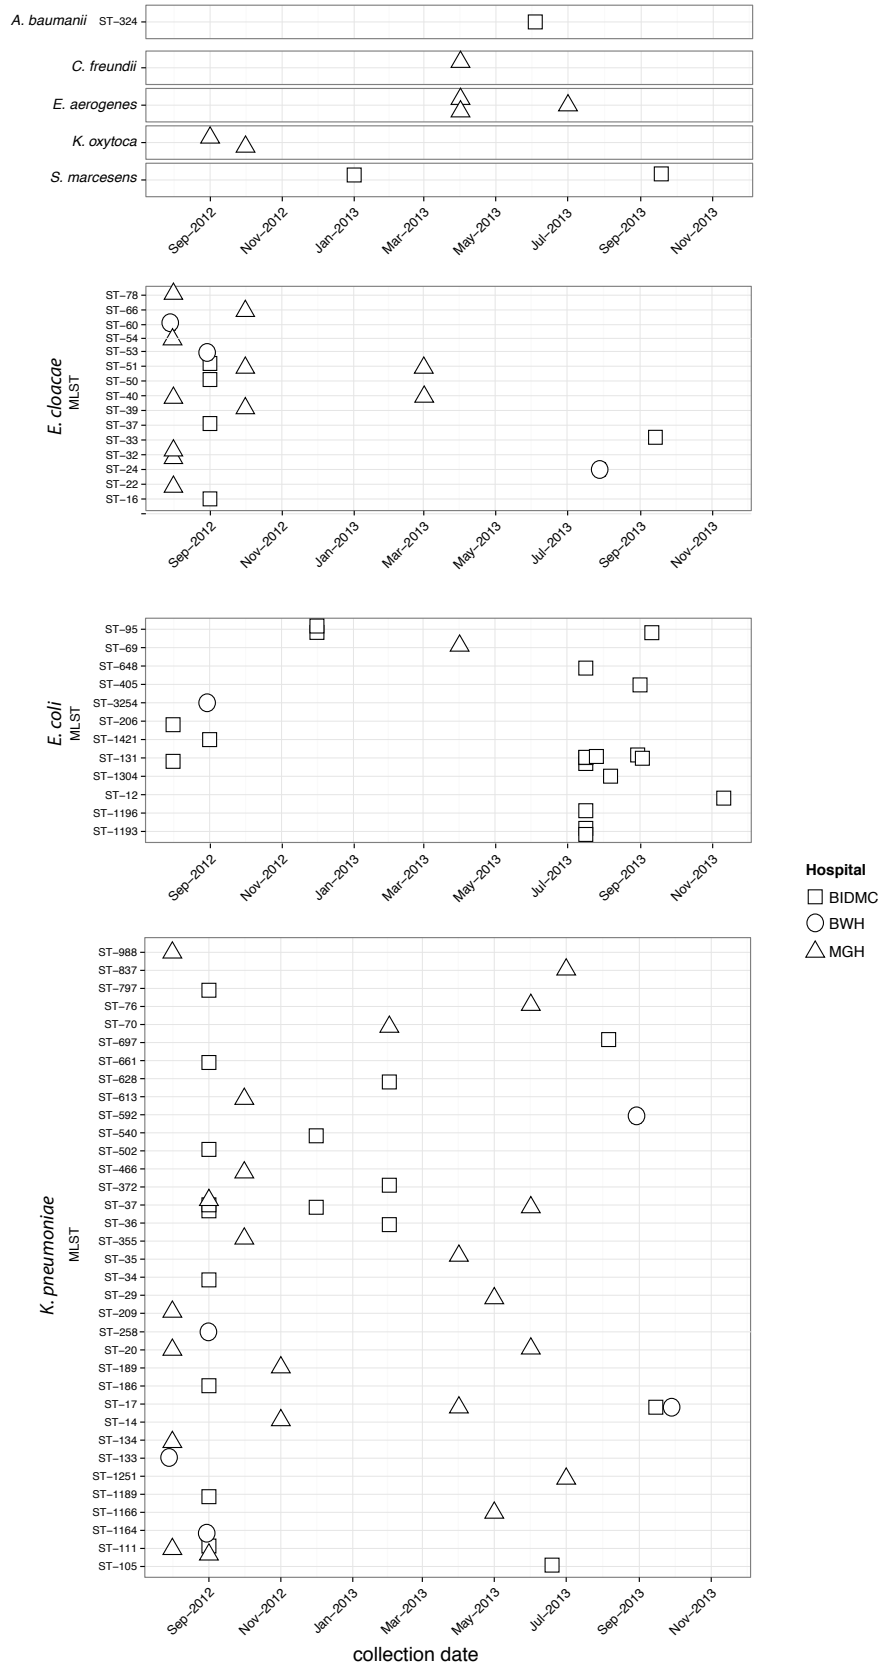



Figure S3. Bar chart showing the MIC to meropenem (ug/mL) per predicted genetic determinant for resistance of isolates within Prospective Collection. The multiplying factor on top of each bar indicates the number of isolates represented by each bar when the number was more than one.

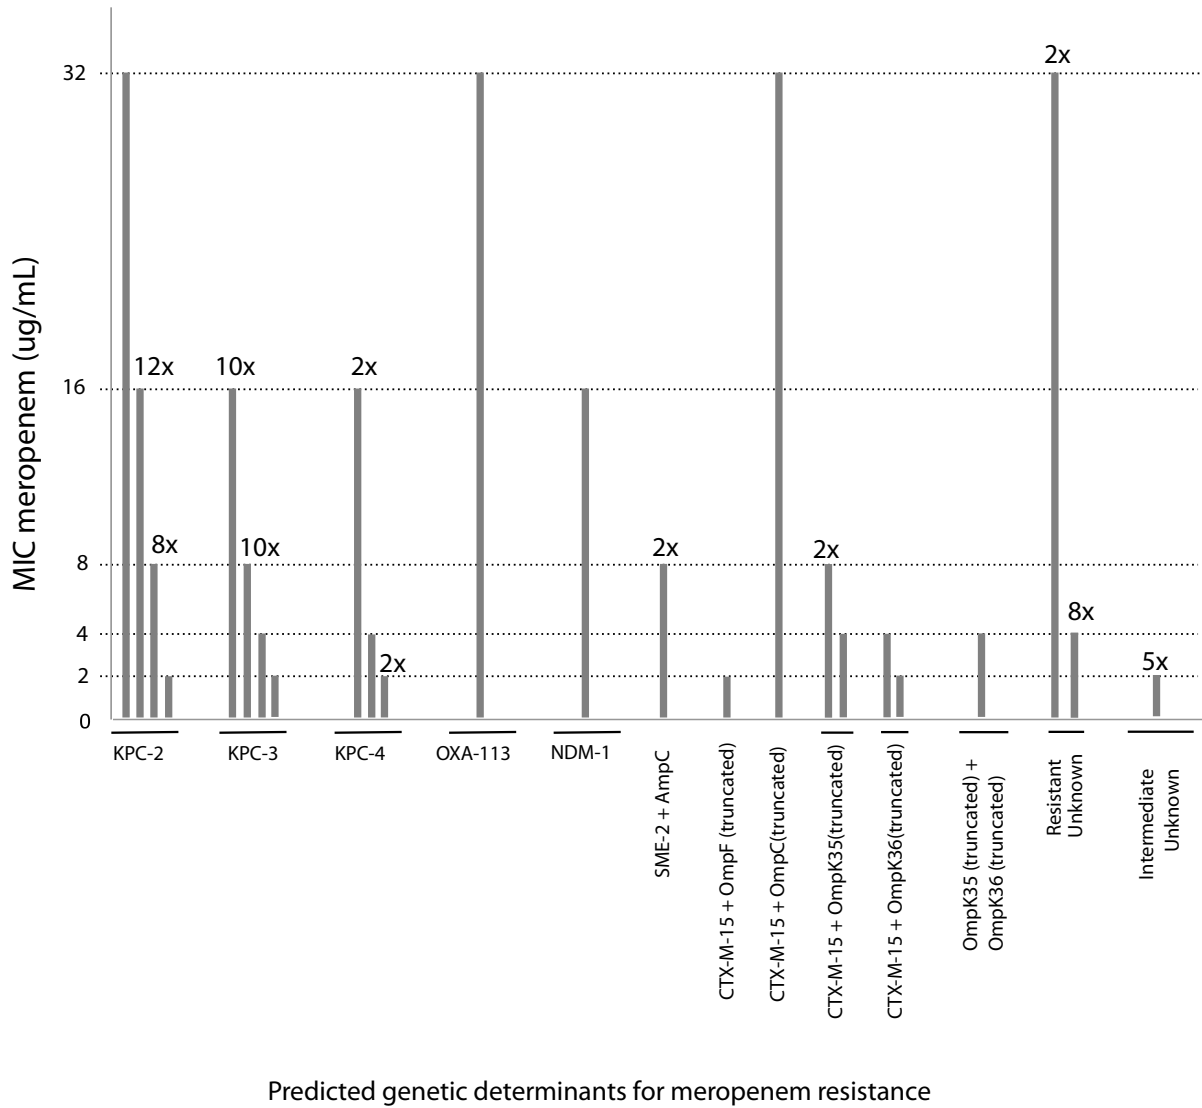

Figure S4. **Phylogeny of *K. pneumoniae* isolates** - Column containing green, gray, yellow and red rectangles indicate MIC of meropenem in ug/mL for each isolate according to the legend. Grid with blue rectangles indicates the plausible genotype conferring resistance for each specimen from the list of alternative genotypes located on the top. Labels near blue rectangles indicate if gene is located in the chromosome, or, in the case of plasmid encoded genes, the replicon and name or Genbank accession of similar plasmid (in brackets). Black rectangles indicate the city in which the isolate was collected. Vertical thick bars delimit clades associated with a MLST and containing resistant strains. Branch length scale indicates the number of substitutions per site.

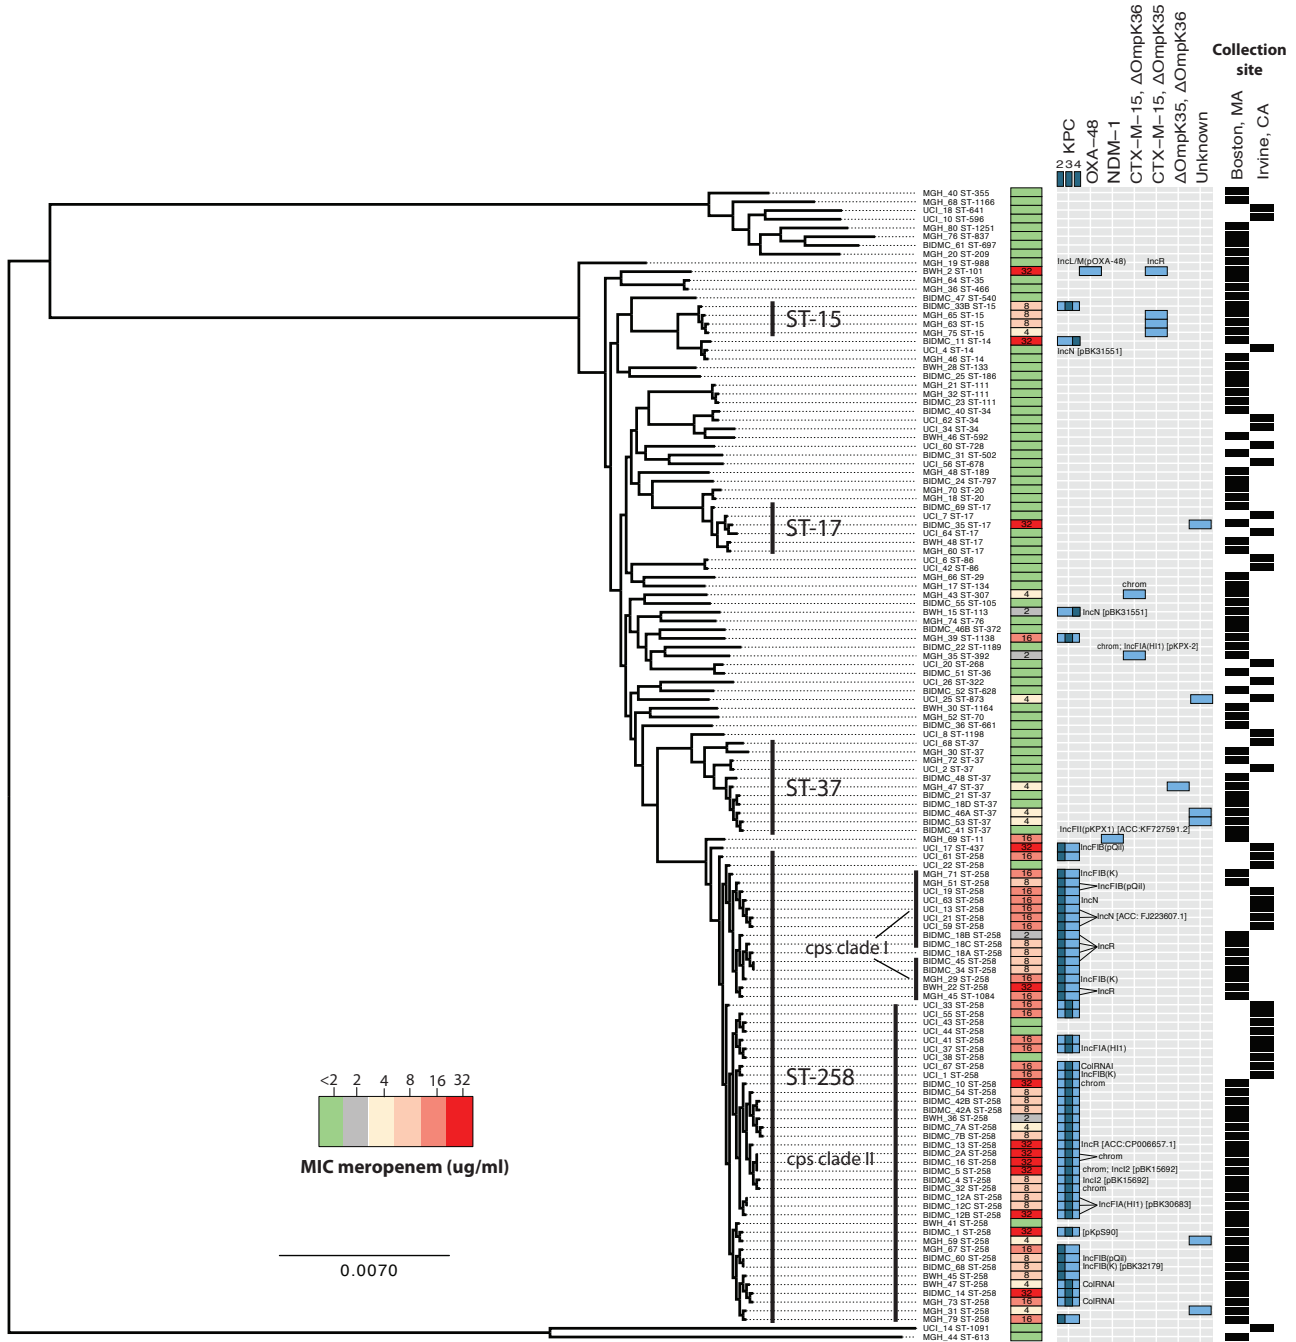

Figure S5. **Phylogeny of *E. coli* isolates** - Column containing green, gray, yellow and red rectangles indicate MIC of meropenem in ug/mL for each isolate according to the legend. Grid with blue rectangles indicates the plausible genotype conferring resistance for each specimen from the list of alternative genotypes located on the top. Labels near blue rectangles indicate if gene is located in the chromosome, or, in the case of plasmid encoded genes, the replicon and name or Genbank accession of similar plasmid (in brackets). Black rectangles indicate the city in which the isolate was collected. Vertical thick bars delimit clades associated with a MLST and containing resistant strains. Branch length scale indicates the number of substitutions per site.

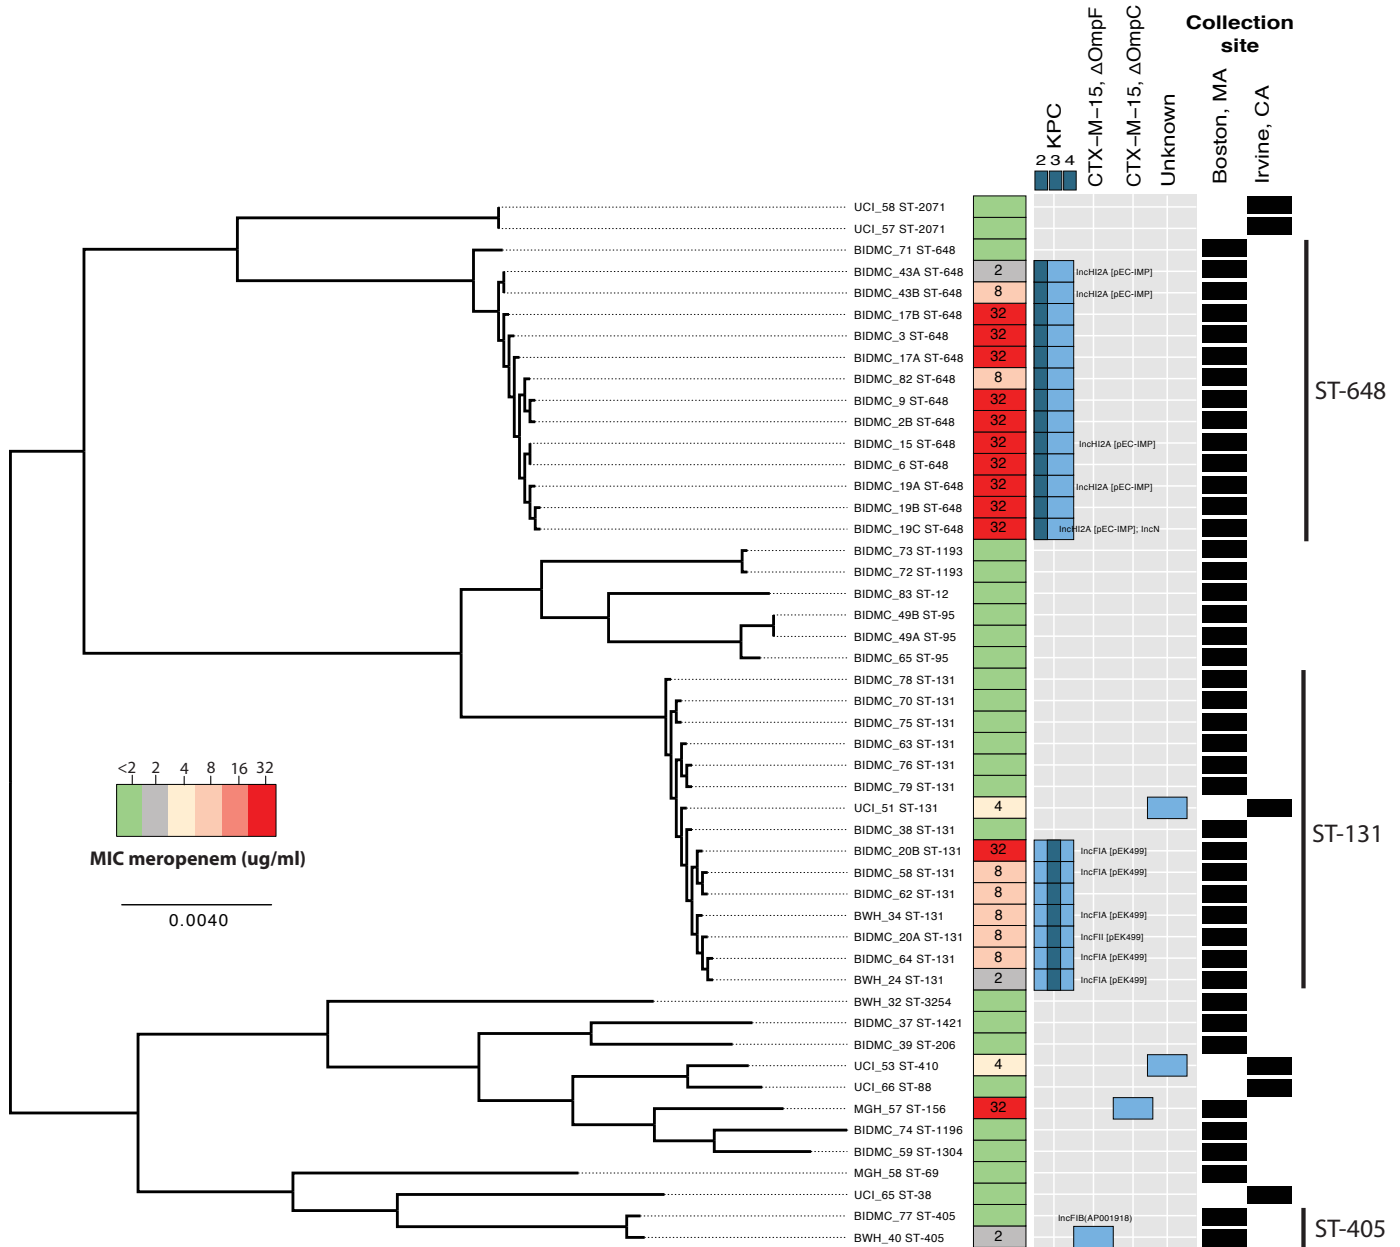

Figure S6. **Phylogeny of *E. cloacae* isolates** - Column containing green, gray, yellow and red rectangles indicate MIC of meropenem in ug/mL for each isolate according to the legend. Grid with blue rectangles indicates the plausible genotype conferring resistance for each specimen from the list of alternative genotypes located on the top. Labels near blue rectangles indicate if gene is located in the chromosome, or, in the case of plasmid encoded genes, the replicon and name or Genbank accession of similar plasmid (in brackets). Black rectangles indicate the city in which the isolate was collected. Vertical thick bars delimit clades associated with a MLST and containing resistant strains. Branch length scale indicates the number of substitutions per site.

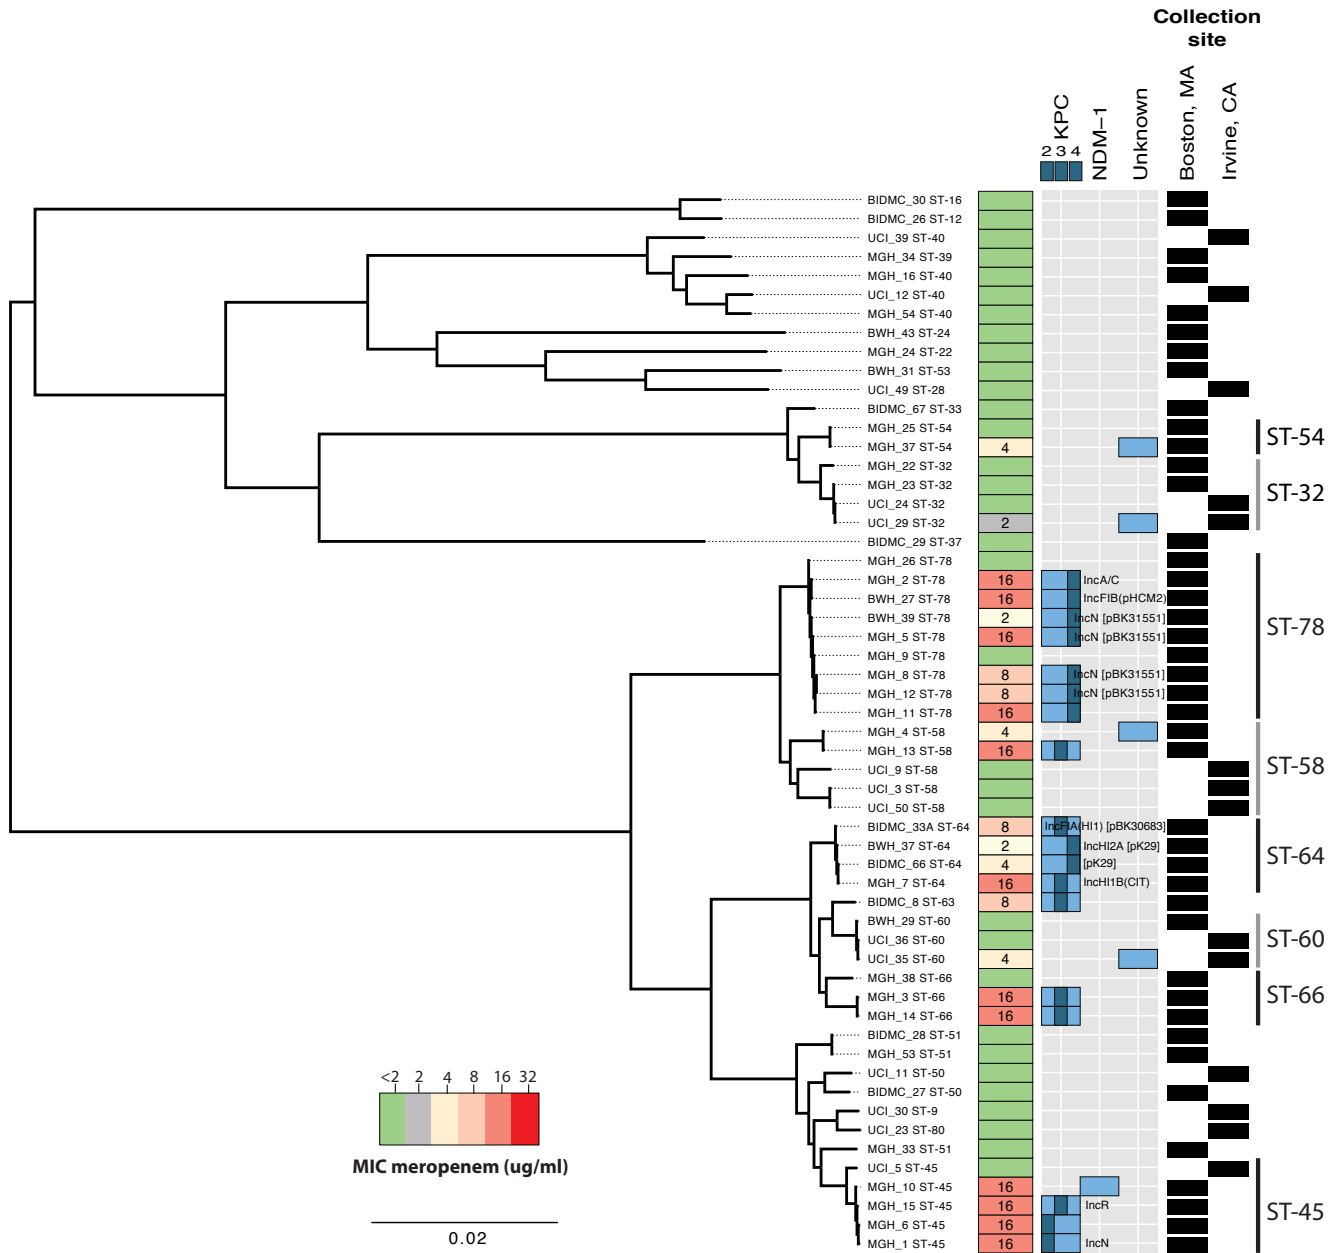

Figure S7. **Phylogenetic tree of amino acid alignment of *bla*<sub>OXA-10</sub> and *bla*<sub>OXA-11</sub> genes.** A) OTUs in black represent protein sequences of *bla*<sub>OXA-10</sub> and *bla*<sub>OXA-11</sub> genes from the antibiotic resistance databases used in the re-annotation of genes (see SI Materials and Methods). OTUs in blue correspond to *bla*<sub>OXA-10</sub> representatives in two of our isolates. The OTU in green represents the first characterized *bla*<sub>OXA-10</sub> gene (39) (originally named as PSE-2 *bla*). The OTU in red represents BIDMC\_35's *bla*<sub>OXA-10</sub>. MAFFT (27) (--globalpair --maxiterate 16) was used in the alignment of sequences, FastTree (17) in the tree reconstruction and FigTree (18) in the rendering of the tree. Branch length scale indicates the number of substitutions per site. B) Partial visualization of multiple sequence alignment of few sequences depicted in the phylogenetic tree. Rendered by Seaview (40).

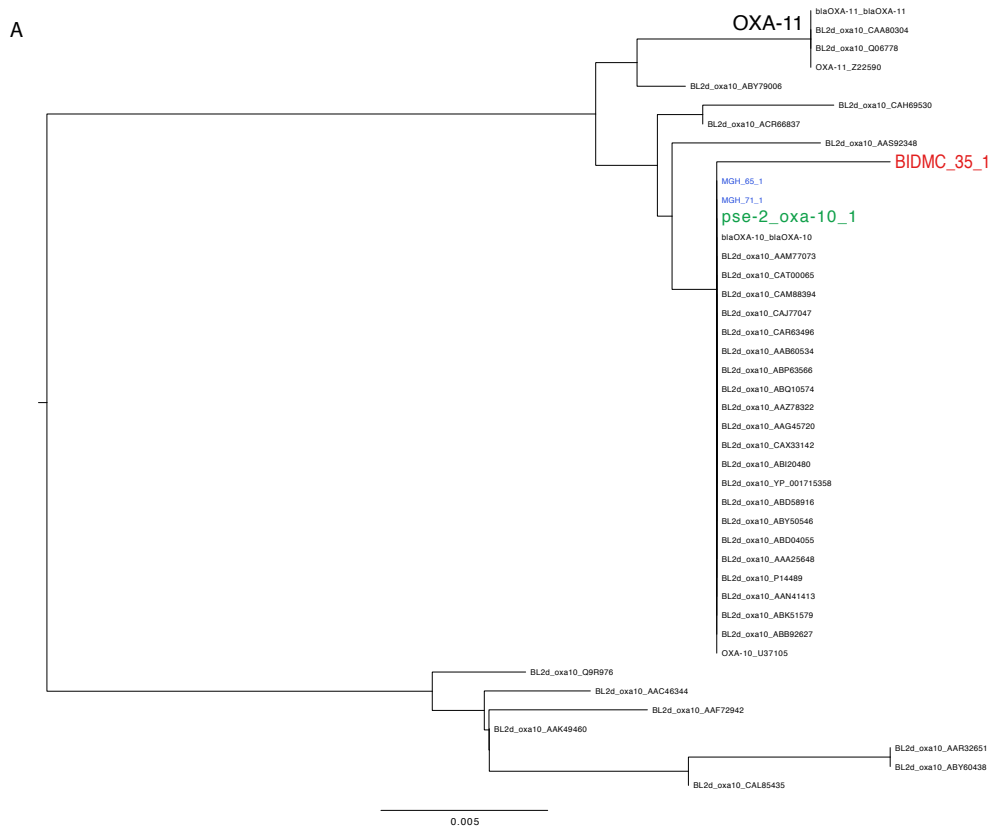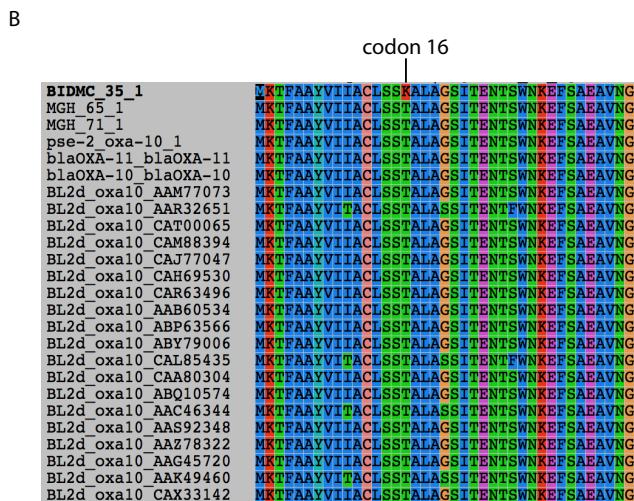

Figure S8. **Phylogenetic tree of nucleotide alignment of Tn4401 isoforms** - Tn4401 transposon isoforms are indicated according to the color legend. Only transposons encoded in the genomes of *K. pneumoniae*, *E. coli* and *E. cloacae* isolates were included in this analysis. Very large branches were contracted to facilitate visualization and indicated by scale breaks (two parallel lines). Branch length scales indicate the number of substitutions per site.

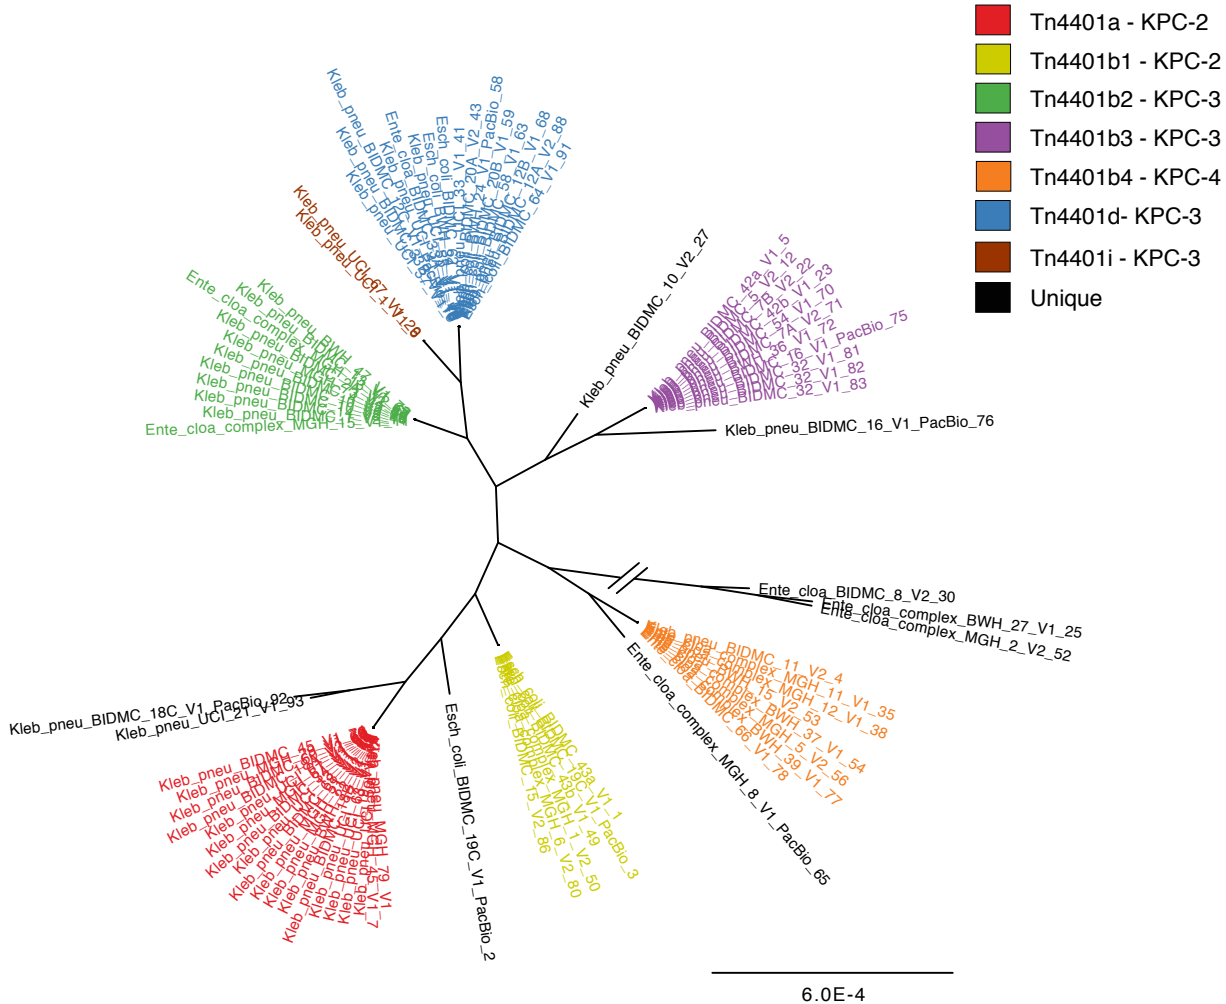



Figure S10. **Alignment of UCI\_1 and UCI\_67 reads against BIDMC\_43B assembly confirms a 210 nt deletion in Tn4401.** Top track shows the Tn4401b-containing region of scaffold NZ\_KI929662.1 from BIMDC\_43B. Grey, blue and red arrows in the second, third and fourth track represent alignments of sequencing reads from isolates BIDMC\_43B, UCI\_1 and UCI\_67 to BIDMC\_43B assembly, respectively. The color of the arrows indicates paired-end reads (jumps) mapped farther apart than expected (red; farther than 99.5% of jumps), optimally mapped (grey) and closer than expected (blue; closer than 99.5% of jumps) based on the distribution of all jumps aligned to the reference. Colored vertical lines in the arrows correspond to nucleotide differences between reads and the reference genome, BIDMC\_43B.

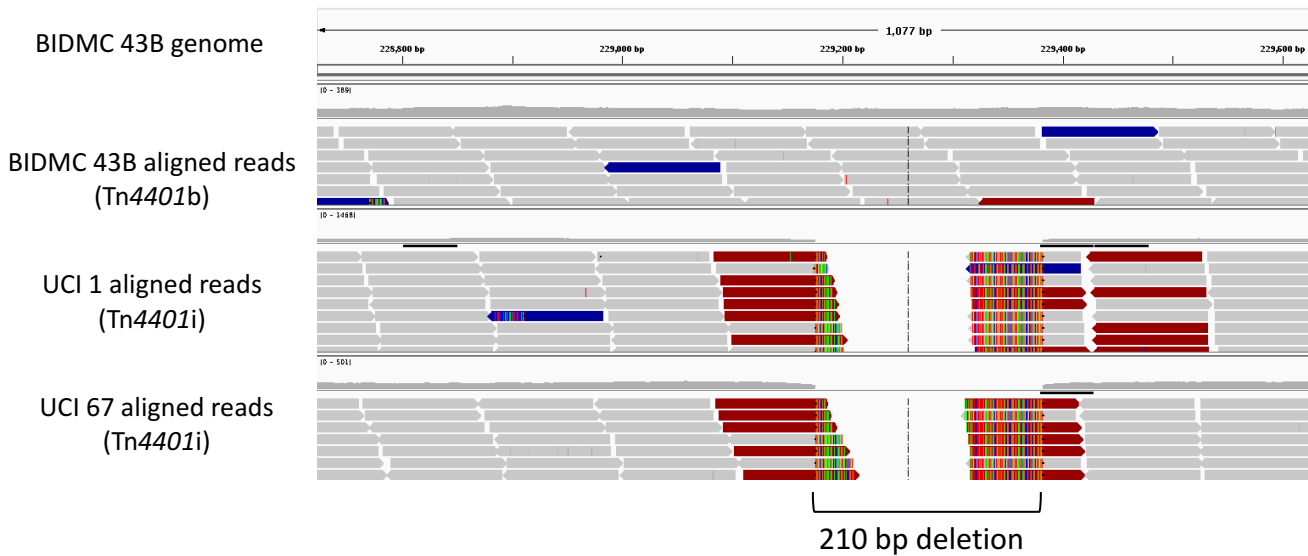



## SI REFERENCES

1. Ribeiro FJ, et al. (2012) Finished bacterial genomes from shotgun sequence data. *Genome research* 22(11):2270–2277.
2. Kim KE, et al. (2014) Long-read, whole-genome shotgun sequence data for five model organisms. *Sci Data* 1:140045.
3. Maccallum I, et al. (2009) ALLPATHS 2: small genomes assembled accurately and with high continuity from short paired reads. *Genome Biol* 10(10):R103.
4. Walker BJ, et al. (2014) Pilon: an integrated tool for comprehensive microbial variant detection and genome assembly improvement. *PloS one* 9(11):e112963.
5. Li H, Durbin R (2009) Fast and accurate short read alignment with Burrows-Wheeler transform. *Bioinformatics (Oxford, England)* 26(14):1754–1760.
6. Boetzer M, Henkel CV, Jansen HJ, Butler D, Pirovano W (2011) Scaffolding pre-assembled contigs using SSPACE. *Bioinformatics (Oxford, England)* 27(4):578–579.
7. Chin C-S, et al. (2013) Nonhybrid, finished microbial genome assemblies from long-read SMRT sequencing data. *Nature methods* 10(6):563–569.
8. Hyatt D, et al. (2010) Prodigal: prokaryotic gene recognition and translation initiation site identification. *BMC Bioinformatics* 11:119.
9. Lagesen K, et al. (2007) RNAmmer: consistent and rapid annotation of ribosomal RNA genes. *Nucleic Acids Res* 35(9):3100–3108.
10. Lowe TM, Eddy SR (1997) tRNAscan-SE: a program for improved detection of transfer RNA genes in genomic sequence. *Nucleic Acids Res* 25(5):955–964.
11. UniProt Consortium (2015) UniProt: a hub for protein information. *Nucleic Acids Res* 43(Database issue):D204–12.
12. Haft DH, et al. (2013) TIGRFAMs and Genome Properties in 2013. *Nucleic Acids Res* 41(Database issue):D387–95.
13. Zankari E, et al. (2012) Identification of acquired antimicrobial resistance genes. *J Antimicrob Chemother* 67(11):2640–2644.
14. Liu B, Pop M (2009) ARDB--Antibiotic Resistance Genes Database. *Nucleic Acids Res* 37(Database):D443–D447.
15. Li L, Stoeckert CJ, Roos DS (2003) OrthoMCL: identification of ortholog groups for eukaryotic genomes. *Genome research* 13(9):2178–2189.
16. Edgar RC (2004) MUSCLE: multiple sequence alignment with high accuracy and high

- throughput. *Nucleic Acids Res* 32(5):1792–1797.
17. Price MN, Dehal PS, Arkin AP (2009) FastTree: computing large minimum evolution trees with profiles instead of a distance matrix. *Molecular Biology and Evolution* 26(7):1641–1650.
  18. Figtree *Figtree* Available at: <http://tree.bio.ed.ac.uk/software/figtree/> [Accessed September 7, 2016].
  19. Darling AE, Mau B, Perna NT (2010) progressiveMauve: multiple genome alignment with gene gain, loss and rearrangement. *PloS one* 5(6):e11147.
  20. Croucher NJ, et al. (2015) Rapid phylogenetic analysis of large samples of recombinant bacterial whole genome sequences using Gubbins. *Nucleic Acids Res* 43(3):e15.
  21. Stamatakis A, Ludwig T, Meier H (2005) RAxML-III: a fast program for maximum likelihood-based inference of large phylogenetic trees. *Bioinformatics* 21(4):456–463.
  22. Price MN, Dehal PS, Arkin AP (2010) FastTree 2--approximately maximum-likelihood trees for large alignments. *PloS one* 5(3):e9490.
  23. Huson DH, Scornavacca C (2012) Dendroscope 3: an interactive tool for rooted phylogenetic trees and networks. *Syst Biol* 61(6):1061–1067.
  24. DeLeo FR, et al. (2014) Molecular dissection of the evolution of carbapenem-resistant multilocus sequence type 258 *Klebsiella pneumoniae*. *Proceedings of the National Academy of Sciences of the United States of America* 111(13):4988–4993.
  25. Chen L, et al. (2014) Multiplex PCR for identification of two capsular types in epidemic KPC-producing *Klebsiella pneumoniae* sequence type 258 strains. *Antimicrobial agents and chemotherapy* 58(7):4196–4199.
  26. Altschul SF, Gish W, Miller W, Myers EW, Lipman DJ (1990) Basic local alignment search tool. *Journal of Molecular Biology* 215(3):403–410.
  27. Katoh K (2005) MAFFT version 5: improvement in accuracy of multiple sequence alignment. *Nucleic Acids Res* 33(2):511–518.
  28. Delcher AL, Phillippy A, Carlton J, Salzberg SL (2002) Fast algorithms for large-scale genome alignment and comparison. *Nucleic Acids Res* 30(11):2478–2483.
  29. Carattoli A, et al. (2014) In silico detection and typing of plasmids using PlasmidFinder and plasmid multilocus sequence typing. *Antimicrobial agents and chemotherapy* 58(7):3895–3903.
  30. R Core Team. R: A language and environment for statistical computing (2013) R Core Team. R: A language and environment for statistical computing. [wwwR-project.org](http://www.R-project.org). Available at: <http://www.R-project.org> [Accessed February 9, 2016].

31. Lanza VF, et al. (2014) Plasmid flux in Escherichia coli ST131 sublineages, analyzed by plasmid constellation network (PLACNET), a new method for plasmid reconstruction from whole genome sequences. *PLoS Genet* 10(12):e1004766.
32. Kent WJ (2002) BLAT--the BLAST-like alignment tool. *Genome research* 12(4):656–664.
33. Martinez T, Martinez I, Vazquez GJ, Aquino EE, Robledo IE (2016) Genetic environment of the KPC gene in Acinetobacter baumannii ST2 clone from Puerto Rico and genomic insights into its drug resistance. *J Med Microbiol* 65(8):784–792.
34. Wang L, et al. (2015) Complete sequences of KPC-2-encoding plasmid p628-KPC and CTX-M-55-encoding p628-CTXM coexisted in Klebsiella pneumoniae. *Front Microbiol* 6:838.
35. Krzywinski M, et al. (2009) Circos: an information aesthetic for comparative genomics. *Genome research* 19(9):1639–1645.
36. Li H Aligning sequence reads, clone sequences and assembly contigs with BWA-MEM. *ArXiv e-prints* (1303.3997).
37. Thorvaldsdóttir H, Robinson JT, Mesirov JP (2013) Integrative Genomics Viewer (IGV): high-performance genomics data visualization and exploration. *Briefings in Bioinformatics* 14(2):178–192.
38. Finn RD, et al. (2016) The Pfam protein families database: towards a more sustainable future. *Nucleic Acids Res* 44(D1):D279–85.
39. Huovinen P, Huovinen S, Jacoby GA (1988) Sequence of PSE-2 beta-lactamase. *Antimicrobial agents and chemotherapy* 32(1):134–136.
40. Gouy M, Guindon S, Gascuel O (2010) SeaView version 4: A multiplatform graphical user interface for sequence alignment and phylogenetic tree building. *Molecular Biology and Evolution* 27(2):221–224.

## SI TABLES

Table S1. List of strains, hospitals, collection date, ST, MIC to meropenem, predicted carbapenem resistance determinant, cps prediction and Tn4401 isoform.

| collection phase   | collection date | clinical sample type     | species                      | isolate   | MIC mero (ug/ml) | MLST  | cps prediction | resistance phenotype | genotype conferring resistance | Tn4401 variant                |
|--------------------|-----------------|--------------------------|------------------------------|-----------|------------------|-------|----------------|----------------------|--------------------------------|-------------------------------|
| Boston historical  | September-07    | Urine                    | <i>Enterobacter cloacae</i>  | MGH 13    | >=16             | ST58  |                | NON-SUSCEPTIBLE      | blaKPC-3                       | Tn4401b2                      |
| Boston historical  | October-07      | Urine                    | <i>Enterobacter cloacae</i>  | MGH 5     | >=16             | ST78  |                | NON-SUSCEPTIBLE      | blaKPC-4                       | Tn4401b4                      |
| Boston historical  | January-08      | Wound                    | <i>Enterobacter cloacae</i>  | MGH 7     | >=16             | ST64  |                | NON-SUSCEPTIBLE      | blaKPC-3                       | truncated                     |
| Boston historical  | April-08        | Urine                    | <i>Enterobacter cloacae</i>  | MGH 9     | 0.5              | ST78  |                | SUSCEPTIBLE          |                                |                               |
| Boston historical  | July-08         | Blood Culture            | <i>Klebsiella pneumoniae</i> | BIDMC 5   | >32              | ST258 | II             | NON-SUSCEPTIBLE      | blaKPC-3                       | 2 copies: Tn4401b3, truncated |
| Boston historical  | December-08     | Swab, Peritoneal Abscess | <i>Klebsiella pneumoniae</i> | BIDMC 11  | >32              | ST14  |                | NON-SUSCEPTIBLE      | blaKPC-4                       | Tn4401b4                      |
| Boston historical  | April-09        | Respiratory              | <i>Enterobacter cloacae</i>  | MGH 14    | >=16             | ST66  |                | NON-SUSCEPTIBLE      | blaKPC-3                       | truncated                     |
| Boston historical  | May-09          | Urine                    | <i>Enterobacter cloacae</i>  | MGH 10    | >=16             | ST45  |                | NON-SUSCEPTIBLE      | NDM-1                          |                               |
| Boston historical  | June-09         | Urine                    | <i>Enterobacter cloacae</i>  | MGH 12    | 8                | ST78  |                | NON-SUSCEPTIBLE      | blaKPC-4                       | Tn4401b4                      |
| Boston historical  | June-09         | Urine                    | <i>Enterobacter cloacae</i>  | MGH 11    | >=16             | ST78  |                | NON-SUSCEPTIBLE      | blaKPC-4                       | Tn4401b4                      |
| Boston historical  | July-09         | Urine                    | <i>Enterobacter cloacae</i>  | MGH 8     | 8                | ST78  |                | NON-SUSCEPTIBLE      | blaKPC-4                       | unique                        |
| Boston historical  | July-09         | Respiratory              | <i>Enterobacter cloacae</i>  | MGH 1     | >=16             | ST45  |                | NON-SUSCEPTIBLE      | blaKPC-2                       | Tn4401b1                      |
| Boston historical  | August-09       | Swab, abdominal incision | <i>Escherichia coli</i>      | BIDMC 3   | >32              | ST648 |                | NON-SUSCEPTIBLE      | blaKPC-2                       | truncated                     |
| Boston historical  | August-09       | Foot Culture             | <i>Klebsiella pneumoniae</i> | BIDMC 10  | >32              | ST258 | II             | NON-SUSCEPTIBLE      | blaKPC-3                       | 3 copies: 2xTn4401b2, unique  |
| Boston historical  | September-09    | Wound                    | <i>Enterobacter cloacae</i>  | MGH 2     | >=16             | ST78  |                | NON-SUSCEPTIBLE      | blaKPC-4                       | unique                        |
| Boston historical  | September-09    | Urine                    | <i>Escherichia coli</i>      | BIDMC 9   | >32              | ST648 |                | NON-SUSCEPTIBLE      | blaKPC-2                       | truncated                     |
| Boston historical  | September-09    | Tissue, Abdomen          | <i>Klebsiella pneumoniae</i> | BIDMC 4   | >8               | ST258 | II             | NON-SUSCEPTIBLE      | blaKPC-3                       | Tn4401b2                      |
| Boston historical  | November-09     | Urine                    | <i>Enterobacter cloacae</i>  | MGH 6     | >=16             | ST45  |                | NON-SUSCEPTIBLE      | blaKPC-2                       | Tn4401b1                      |
| Boston historical  | November-09     | Urine                    | <i>Klebsiella pneumoniae</i> | BIDMC 14  | >32              | ST258 | II             | NON-SUSCEPTIBLE      | blaKPC-3                       | Tn4401b2                      |
| Boston historical  | November-09     | Blood Culture            | <i>Klebsiella pneumoniae</i> | BIDMC 16  | >32              | ST258 | II             | NON-SUSCEPTIBLE      | blaKPC-3                       | 2 copies: Tn4401b3, unique    |
| Boston historical  | November-09     | Blood Culture            | <i>Klebsiella pneumoniae</i> | BIDMC 13  | >32              | ST258 | II             | NON-SUSCEPTIBLE      | blaKPC-3                       | Tn4401b2                      |
| Boston historical  | December-09     | Urine                    | <i>Enterobacter cloacae</i>  | MGH 4     | 4                | ST58  |                | NON-SUSCEPTIBLE      | UNKNOWN                        |                               |
| Boston historical  | December-09     | Respiratory              | <i>Enterobacter cloacae</i>  | MGH 3     | >=16             | ST66  |                | NON-SUSCEPTIBLE      | blaKPC-3                       | truncated                     |
| Boston historical  | December-09     | Peritoneal Fluid         | <i>Escherichia coli</i>      | BIDMC 17B | >32              | ST648 |                | NON-SUSCEPTIBLE      | blaKPC-2                       | truncated                     |
| Boston historical  | December-09     | Blood Culture            | <i>Escherichia coli</i>      | BIDMC 17A | >32              | ST648 |                | NON-SUSCEPTIBLE      | blaKPC-2                       | truncated                     |
| Boston historical  | March-10        | Swab, Abdomen            | <i>Escherichia coli</i>      | BIDMC 15  | >32              | ST648 |                | NON-SUSCEPTIBLE      | blaKPC-2                       | 2 copies: Tn4401b1, truncated |
| Boston historical  | March-10        | Bile                     | <i>Escherichia coli</i>      | BIDMC 6   | >32              | ST648 |                | NON-SUSCEPTIBLE      | blaKPC-2                       | truncated                     |
| Boston historical  | April-10        | Blood Culture            | <i>Klebsiella pneumoniae</i> | BIDMC 12B | >32              | ST258 | II             | NON-SUSCEPTIBLE      | blaKPC-3                       | Tn4401d                       |
| Boston historical  | May-10          | Blood Culture            | <i>Escherichia coli</i>      | BIDMC 2B  | >32              | ST648 |                | NON-SUSCEPTIBLE      | blaKPC-2                       | truncated                     |
| Boston historical  | May-10          | Blood Culture            | <i>Klebsiella pneumoniae</i> | BIDMC 2A  | >32              | ST258 | II             | NON-SUSCEPTIBLE      | blaKPC-3                       | Tn4401b2                      |
| Boston historical  | August-10       | Urine                    | <i>Klebsiella pneumoniae</i> | BIDMC 18D | <=0.25           | ST37  |                | SUSCEPTIBLE          |                                |                               |
| Boston historical  | August-10       | Bone Tissue, Toe         | <i>Klebsiella pneumoniae</i> | BIDMC 1   | >32              | ST258 | II             | NON-SUSCEPTIBLE      | blaKPC-3                       | Tn4401b2                      |
| Boston historical  | September-10    | Urine                    | <i>Escherichia coli</i>      | BIDMC 19C | >32              | ST648 |                | NON-SUSCEPTIBLE      | blaKPC-2                       | 2 copies: Tn4401b1, unique    |
| Boston historical  | October-10      | Bronchoalveolar Lavage   | <i>Escherichia coli</i>      | BIDMC 19A | >32              | ST648 |                | NON-SUSCEPTIBLE      | blaKPC-2                       | truncated                     |
| Boston historical  | October-10      | Urine                    | <i>Escherichia coli</i>      | BIDMC 19B | >32              | ST648 |                | NON-SUSCEPTIBLE      | blaKPC-2                       | truncated                     |
| Boston historical  | November-10     | Urine                    | <i>Klebsiella pneumoniae</i> | BIDMC 18C | >8               | ST258 | I              | NON-SUSCEPTIBLE      | blaKPC-2                       | unique                        |
| Boston historical  | December-10     | Urine                    | <i>Klebsiella pneumoniae</i> | BIDMC 18B | 2                | ST258 | I              | NON-SUSCEPTIBLE      | blaKPC-2                       | Tn4401a                       |
| Boston historical  | July-11         | Urine                    | <i>Enterobacter cloacae</i>  | BIDMC 8   | 8                | ST63  |                | NON-SUSCEPTIBLE      | blaKPC-3                       | unique                        |
| Boston historical  | November-11     | Tissue                   | <i>Klebsiella pneumoniae</i> | BWH 2     | >32              | ST101 |                | NON-SUSCEPTIBLE      | OXA-48                         |                               |
| Boston historical  | March-12        | Peritoneal               | <i>Klebsiella pneumoniae</i> | BWH 15    | 2                | ST113 |                | NON-SUSCEPTIBLE      | blaKPC-4                       | Tn4401b4                      |
| Boston historical  | April-12        | Urine                    | <i>Escherichia coli</i>      | BIDMC 20A | 8                | ST131 |                | NON-SUSCEPTIBLE      | blaKPC-3                       | Tn4401d                       |
| Boston historical  | April-12        | Urine                    | <i>Klebsiella pneumoniae</i> | BIDMC 7A  | 4                | ST258 | II             | NON-SUSCEPTIBLE      | blaKPC-3                       | Tn4401b3                      |
| Boston historical  | April-12        | Sputum                   | <i>Klebsiella pneumoniae</i> | BIDMC 12A | >8               | ST258 | II             | NON-SUSCEPTIBLE      | blaKPC-3                       | Tn4401d                       |
| Boston historical  | April-12        | Urine                    | <i>Klebsiella pneumoniae</i> | BIDMC 7B  | 8                | ST258 | II             | NON-SUSCEPTIBLE      | blaKPC-3                       | Tn4401b3                      |
| Boston historical  | May-12          | Urine                    | <i>Escherichia coli</i>      | BIDMC 20B | >32              | ST131 |                | NON-SUSCEPTIBLE      | blaKPC-3                       | Tn4401d                       |
| Boston historical  | May-12          | Urine                    | <i>Klebsiella pneumoniae</i> | BIDMC 18A | >8               | ST258 | UNKNOWN        | NON-SUSCEPTIBLE      | blaKPC-2                       | Tn4401a                       |
| Boston historical  | May-12          | Endotracheal             | <i>Klebsiella pneumoniae</i> | BIDMC 12C | >8               | ST258 | II             | NON-SUSCEPTIBLE      | blaKPC-3                       | Tn4401d                       |
| Boston historical  | June-12         | Urine                    | <i>Klebsiella pneumoniae</i> | BWH 22    | >32              | ST258 | I              | NON-SUSCEPTIBLE      | blaKPC-2                       | Tn4401a                       |
| Boston historical  | July-12         | Drainage                 | <i>Escherichia coli</i>      | BWH 24    | 2                | ST131 |                | NON-SUSCEPTIBLE      | blaKPC-3                       | Tn4401d                       |
| Boston prospective | August-12       | Tissue                   | <i>Enterobacter cloacae</i>  | MGH 24    | <=0.25           | ST22  |                | SUSCEPTIBLE          |                                |                               |
| Boston prospective | August-12       | Urine                    | <i>Enterobacter cloacae</i>  | MGH 22    | <=0.25           | ST32  |                | SUSCEPTIBLE          |                                |                               |
| Boston prospective | August-12       | Urine                    | <i>Enterobacter cloacae</i>  | MGH 23    | <=0.25           | ST32  |                | SUSCEPTIBLE          |                                |                               |
| Boston prospective | August-12       | Respiratory              | <i>Enterobacter cloacae</i>  | MGH 16    | <=0.25           | ST40  |                | SUSCEPTIBLE          |                                |                               |
| Boston prospective | August-12       | Wound                    | <i>Enterobacter cloacae</i>  | BWH 29    | <=0.25           | ST60  |                | SUSCEPTIBLE          |                                |                               |
| Boston prospective | August-12       | Urine                    | <i>Enterobacter cloacae</i>  | MGH 26    | <=0.25           | ST78  |                | SUSCEPTIBLE          |                                |                               |
| Boston prospective | August-12       | Urine                    | <i>Enterobacter cloacae</i>  | MGH 25    | 0.5              | ST54  |                | SUSCEPTIBLE          |                                |                               |
| Boston prospective | August-12       | Respiratory              | <i>Enterobacter cloacae</i>  | BIDMC 33A | >8               | ST64  |                | NON-SUSCEPTIBLE      | blaKPC-3                       | Tn4401d                       |
| Boston prospective | August-12       | Respiratory              | <i>Enterobacter cloacae</i>  | MGH 15    | >=16             | ST45  |                | NON-SUSCEPTIBLE      | blaKPC-3                       | Tn4401b2                      |
| Boston prospective | August-12       | Sputum                   | <i>Enterobacter cloacae</i>  | BWH 27    | 16               | ST78  |                | NON-SUSCEPTIBLE      | blaKPC-4                       | unique                        |
| Boston prospective | August-12       | Blood                    | <i>Escherichia coli</i>      | BIDMC 38  | <=0.25           | ST131 |                | SUSCEPTIBLE          |                                |                               |
| Boston prospective | August-12       | Blood                    | <i>Escherichia coli</i>      | BIDMC 39  | <=0.25           | ST206 |                | SUSCEPTIBLE          |                                |                               |
| Boston prospective | August-12       | Urine                    | <i>Klebsiella pneumoniae</i> | MGH 21    | <=0.25           | ST111 |                | SUSCEPTIBLE          |                                |                               |
| Boston prospective | August-12       | Sputum                   | <i>Klebsiella pneumoniae</i> | BWH 28    | <=0.25           | ST133 |                | SUSCEPTIBLE          |                                |                               |
| Boston prospective | August-12       | Urine                    | <i>Klebsiella pneumoniae</i> | MGH 17    | <=0.25           | ST134 |                | SUSCEPTIBLE          |                                |                               |
| Boston prospective | August-12       | Respiratory              | <i>Klebsiella pneumoniae</i> | MGH 18    | <=0.25           | ST20  |                | SUSCEPTIBLE          |                                |                               |
| Boston prospective | August-12       | Respiratory              | <i>Klebsiella pneumoniae</i> | MGH 20    | <=0.25           | ST209 |                | SUSCEPTIBLE          |                                |                               |
| Boston prospective | August-12       | Urine                    | <i>Klebsiella pneumoniae</i> | MGH 19    | <=0.25           | ST988 |                | SUSCEPTIBLE          |                                |                               |
| Boston prospective | August-12       | Respiratory              | <i>Klebsiella pneumoniae</i> | BIDMC 33B | >8               | ST15  |                | NON-SUSCEPTIBLE      | blaKPC-3                       | Tn4401d                       |

| collection phase   | collection date | clinical sample type          | species                      | isolate   | MIC mero (ug/ml) | MLST   | cps prediction | resistance phenotype | genotype conferring resistance        | Tn4401 variant       |
|--------------------|-----------------|-------------------------------|------------------------------|-----------|------------------|--------|----------------|----------------------|---------------------------------------|----------------------|
| Boston prospective | August-12       | Abscess                       | <i>Klebsiella pneumoniae</i> | BIDMC 32  | >8               | ST258  | II             | NON-SUSCEPTIBLE      | blaKPC-3                              | 3 copies: 3xTn4401b3 |
| Boston prospective | September-12    | Blood                         | <i>Enterobacter cloacae</i>  | BIDMC 26  | <=0.25           | ST12   |                | SUSCEPTIBLE          |                                       |                      |
| Boston prospective | September-12    | Urine                         | <i>Enterobacter cloacae</i>  | BIDMC 30  | <=0.25           | ST16   |                | SUSCEPTIBLE          |                                       |                      |
| Boston prospective | September-12    | Wound                         | <i>Enterobacter cloacae</i>  | BIDMC 29  | <=0.25           | ST37   |                | SUSCEPTIBLE          |                                       |                      |
| Boston prospective | September-12    | Wound                         | <i>Enterobacter cloacae</i>  | BIDMC 27  | <=0.25           | ST50   |                | SUSCEPTIBLE          |                                       |                      |
| Boston prospective | September-12    | Blood                         | <i>Enterobacter cloacae</i>  | BIDMC 28  | <=0.25           | ST51   |                | SUSCEPTIBLE          |                                       |                      |
| Boston prospective | September-12    | Bile                          | <i>Enterobacter cloacae</i>  | BWH 31    | <=0.25           | ST53   |                | SUSCEPTIBLE          |                                       |                      |
| Boston prospective | September-12    | Rectal Swab                   | <i>Enterobacter cloacae</i>  | BWH 37    | 2                | ST64   |                | NON-SUSCEPTIBLE      | blaKPC-4                              | Tn4401b4             |
| Boston prospective | September-12    | Urine                         | <i>Enterobacter cloacae</i>  | BWH 39    | 2                | ST78   |                | NON-SUSCEPTIBLE      | blaKPC-4                              | Tn4401b4             |
| Boston prospective | September-12    | Blood                         | <i>Escherichia coli</i>      | BIDMC 37  | <=0.25           | ST1421 |                | SUSCEPTIBLE          |                                       |                      |
| Boston prospective | September-12    | Urine                         | <i>Escherichia coli</i>      | BWH 32    | <=0.25           | ST3254 |                | SUSCEPTIBLE          |                                       |                      |
| Boston prospective | September-12    | Wound                         | <i>Escherichia coli</i>      | BWH 34    | >8               | ST131  |                | NON-SUSCEPTIBLE      | blaKPC-3                              | Tn4401d              |
| Boston prospective | September-12    | Tissue                        | <i>Klebsiella oxytoca</i>    | MGH 28    | <=0.25           |        |                | SUSCEPTIBLE          |                                       |                      |
| Boston prospective | September-12    | Urine                         | <i>Klebsiella oxytoca</i>    | MGH 27    | >=16             |        |                | NON-SUSCEPTIBLE      | blaKPC-3                              | unique               |
| Boston prospective | September-12    | Urine                         | <i>Klebsiella pneumoniae</i> | BIDMC 31  | <=0.25           | ST502  |                | SUSCEPTIBLE          |                                       |                      |
| Boston prospective | September-12    | Urine                         | <i>Klebsiella pneumoniae</i> | BIDMC 23  | <=0.25           | ST111  |                | SUSCEPTIBLE          |                                       |                      |
| Boston prospective | September-12    | Urine                         | <i>Klebsiella pneumoniae</i> | MGH 32    | <=0.25           | ST111  |                | SUSCEPTIBLE          |                                       |                      |
| Boston prospective | September-12    | Blood                         | <i>Klebsiella pneumoniae</i> | BWH 30    | <=0.25           | ST1164 |                | SUSCEPTIBLE          |                                       |                      |
| Boston prospective | September-12    | Urine                         | <i>Klebsiella pneumoniae</i> | BIDMC 22  | <=0.25           | ST1189 |                | SUSCEPTIBLE          |                                       |                      |
| Boston prospective | September-12    | Urine                         | <i>Klebsiella pneumoniae</i> | BIDMC 25  | <=0.25           | ST186  |                | SUSCEPTIBLE          |                                       |                      |
| Boston prospective | September-12    | Urine                         | <i>Klebsiella pneumoniae</i> | BIDMC 40  | <=0.25           | ST34   |                | SUSCEPTIBLE          |                                       |                      |
| Boston prospective | September-12    | Urine                         | <i>Klebsiella pneumoniae</i> | BIDMC 21  | <=0.25           | ST37   |                | SUSCEPTIBLE          |                                       |                      |
| Boston prospective | September-12    | Blood                         | <i>Klebsiella pneumoniae</i> | BIDMC 41  | <=0.25           | ST37   |                | SUSCEPTIBLE          |                                       |                      |
| Boston prospective | September-12    | Urine                         | <i>Klebsiella pneumoniae</i> | MGH 30    | <=0.25           | ST37   |                | SUSCEPTIBLE          |                                       |                      |
| Boston prospective | September-12    | Blood                         | <i>Klebsiella pneumoniae</i> | BIDMC 36  | <=0.25           | ST661  |                | SUSCEPTIBLE          |                                       |                      |
| Boston prospective | September-12    | Urine                         | <i>Klebsiella pneumoniae</i> | BIDMC 24  | <=0.25           | ST797  |                | SUSCEPTIBLE          |                                       |                      |
| Boston prospective | September-12    | Urine                         | <i>Klebsiella pneumoniae</i> | BWH 41    | 0.5              | ST258  | II             | SUSCEPTIBLE          |                                       |                      |
| Boston prospective | September-12    | Bronchoalveolar Lavage        | <i>Klebsiella pneumoniae</i> | BWH 36    | 2                | ST258  | II             | NON-SUSCEPTIBLE      | blaKPC-3                              | Tn4401b3             |
| Boston prospective | September-12    | Tissue                        | <i>Klebsiella pneumoniae</i> | MGH 31    | 4                | ST258  | II             | NON-SUSCEPTIBLE      | UNKNOWN                               |                      |
| Boston prospective | September-12    | Urine                         | <i>Klebsiella pneumoniae</i> | BIDMC 34  | >8               | ST258  | I              | NON-SUSCEPTIBLE      | blaKPC-2                              | Tn4401a              |
| Boston prospective | September-12    | Respiratory                   | <i>Klebsiella pneumoniae</i> | MGH 29    | >=16             | ST258  | I              | NON-SUSCEPTIBLE      | blaKPC-2                              | Tn4401a              |
| Boston prospective | September-12    | Urine                         | <i>Klebsiella pneumoniae</i> | BIDMC 35  | >=32             | ST17   |                | NON-SUSCEPTIBLE      | UNKNOWN                               |                      |
| Boston prospective | October-12      | Abdominal Surgical Drain Flui | <i>Enterobacter cloacae</i>  | MGH 33    | <=0.25           | ST51   |                | SUSCEPTIBLE          |                                       |                      |
| Boston prospective | October-12      | Urine                         | <i>Enterobacter cloacae</i>  | MGH 34    | <=0.25           | ST39   |                | SUSCEPTIBLE          |                                       |                      |
| Boston prospective | October-12      | Urine                         | <i>Enterobacter cloacae</i>  | MGH 38    | <=0.25           | ST66   |                | SUSCEPTIBLE          |                                       |                      |
| Boston prospective | October-12      | Urine                         | <i>Enterobacter cloacae</i>  | MGH 37    | 4                | ST54   |                | NON-SUSCEPTIBLE      | UNKNOWN                               |                      |
| Boston prospective | October-12      | Urine                         | <i>Escherichia coli</i>      | BWH 40    | 2                | ST405  |                | NON-SUSCEPTIBLE      | blaCTX-M-15 + OmpF(truncated)         |                      |
| Boston prospective | October-12      | Respiratory                   | <i>Klebsiella oxytoca</i>    | MGH 42    | <=0.25           |        |                | SUSCEPTIBLE          |                                       |                      |
| Boston prospective | October-12      | Urine                         | <i>Klebsiella oxytoca</i>    | MGH 41    | >=16             |        |                | NON-SUSCEPTIBLE      | blaKPC-2                              | unique               |
| Boston prospective | October-12      | Urine                         | <i>Klebsiella pneumoniae</i> | MGH 40    | <=0.25           | ST355  |                | SUSCEPTIBLE          |                                       |                      |
| Boston prospective | October-12      | Urine                         | <i>Klebsiella pneumoniae</i> | MGH 36    | <=0.25           | ST466  |                | SUSCEPTIBLE          |                                       |                      |
| Boston prospective | October-12      | Respiratory                   | <i>Klebsiella pneumoniae</i> | MGH 44    | <=0.25           | ST613  |                | SUSCEPTIBLE          |                                       |                      |
| Boston prospective | October-12      | Bile (fluid)                  | <i>Klebsiella pneumoniae</i> | MGH 35    | 2                | ST392  |                | NON-SUSCEPTIBLE      | blaCTX-M-15 + OmpK36(truncated)       |                      |
| Boston prospective | October-12      | Urine                         | <i>Klebsiella pneumoniae</i> | MGH 43    | 4                | ST307  |                | NON-SUSCEPTIBLE      | blaCTX-M-15 + OmpK36(truncated)       |                      |
| Boston prospective | October-12      | Urine                         | <i>Klebsiella pneumoniae</i> | MGH 39    | >=16             | ST1138 |                | NON-SUSCEPTIBLE      | blaKPC-3                              | truncated            |
| Boston prospective | November-12     | Urine                         | <i>Klebsiella pneumoniae</i> | MGH 46    | <=0.25           | ST14   |                | SUSCEPTIBLE          |                                       |                      |
| Boston prospective | November-12     | Urine                         | <i>Klebsiella pneumoniae</i> | MGH 48    | <=0.25           | ST189  |                | SUSCEPTIBLE          |                                       |                      |
| Boston prospective | November-12     | Wound fluid                   | <i>Klebsiella pneumoniae</i> | MGH 47    | 4                | ST37   |                | NON-SUSCEPTIBLE      | OmpK35(truncated) + OmpK36(truncated) |                      |
| Boston prospective | November-12     | Urine                         | <i>Klebsiella pneumoniae</i> | MGH 45    | >=16             | ST1084 | I              | NON-SUSCEPTIBLE      | blaKPC-2                              | Tn4401a              |
| Boston prospective | December-12     | Blood Culture                 | <i>Escherichia coli</i>      | BIDMC 49B | 0.5              | ST95   |                | SUSCEPTIBLE          |                                       |                      |
| Boston prospective | December-12     | Blood Culture                 | <i>Escherichia coli</i>      | BIDMC 49A | <=0.25           | ST95   |                | SUSCEPTIBLE          |                                       |                      |
| Boston prospective | December-12     | Blood Culture                 | <i>Escherichia coli</i>      | BIDMC 43A | 2                | ST648  |                | NON-SUSCEPTIBLE      | blaKPC-2                              | Tn4401b1             |
| Boston prospective | December-12     | Blood Culture                 | <i>Escherichia coli</i>      | BIDMC 43B | 8                | ST648  |                | NON-SUSCEPTIBLE      | blaKPC-2                              | Tn4401b1             |
| Boston prospective | December-12     | Urine                         | <i>Klebsiella pneumoniae</i> | BIDMC 47  | <=0.25           | ST540  |                | SUSCEPTIBLE          |                                       |                      |
| Boston prospective | December-12     | Sputum                        | <i>Klebsiella pneumoniae</i> | BIDMC 48  | <=0.25           | ST37   |                | SUSCEPTIBLE          |                                       |                      |
| Boston prospective | December-12     | Blood Culture                 | <i>Klebsiella pneumoniae</i> | BIDMC 42A | >8               | ST258  | II             | NON-SUSCEPTIBLE      | blaKPC-3                              | Tn4401b3             |
| Boston prospective | December-12     | Blood Culture                 | <i>Klebsiella pneumoniae</i> | BIDMC 42B | >8               | ST258  | II             | NON-SUSCEPTIBLE      | blaKPC-3                              | Tn4401b3             |
| Boston prospective | January-13      | Bronchoalveolar Lavage        | <i>Serratia marcescens</i>   | BIDMC 50  | <=0.25           |        |                | SUSCEPTIBLE          |                                       |                      |
| Boston prospective | January-13      | Urine                         | <i>Serratia marcescens</i>   | BIDMC 44  | >8               |        |                | NON-SUSCEPTIBLE      | blaSME-2 + AmpC                       |                      |
| Boston prospective | February-13     | Urine                         | <i>Klebsiella pneumoniae</i> | BIDMC 46B | <=0.25           | ST372  |                | SUSCEPTIBLE          |                                       |                      |
| Boston prospective | February-13     | Urine                         | <i>Klebsiella pneumoniae</i> | BIDMC 51  | <=0.25           | ST36   |                | SUSCEPTIBLE          |                                       |                      |
| Boston prospective | February-13     | Urine                         | <i>Klebsiella pneumoniae</i> | BIDMC 52  | <=0.25           | ST628  |                | SUSCEPTIBLE          |                                       |                      |
| Boston prospective | February-13     | Urine                         | <i>Klebsiella pneumoniae</i> | MGH 52    | <=0.25           | ST70   |                | SUSCEPTIBLE          |                                       |                      |
| Boston prospective | February-13     | Urine                         | <i>Klebsiella pneumoniae</i> | BIDMC 46A | 2                | ST37   |                | NON-SUSCEPTIBLE      | UNKNOWN                               |                      |
| Boston prospective | February-13     | Urine                         | <i>Klebsiella pneumoniae</i> | BIDMC 53  | 2                | ST37   |                | NON-SUSCEPTIBLE      | UNKNOWN                               |                      |
| Boston prospective | February-13     | Urine                         | <i>Klebsiella pneumoniae</i> | BIDMC 45  | >8               | ST258  | I              | NON-SUSCEPTIBLE      | blaKPC-2                              | Tn4401a              |
| Boston prospective | February-13     | Urine                         | <i>Klebsiella pneumoniae</i> | MGH 51    | 8                | ST258  | I              | NON-SUSCEPTIBLE      | blaKPC-2                              | Tn4401a              |
| Boston prospective | March-13        | Urine                         | <i>Enterobacter cloacae</i>  | MGH 53    | 1                | ST51   |                | SUSCEPTIBLE          |                                       |                      |
| Boston prospective | March-13        | Urine                         | <i>Enterobacter cloacae</i>  | MGH 54    | 1                | ST40   |                | SUSCEPTIBLE          |                                       |                      |
| Boston prospective | April-13        | Renal Stone                   | <i>Citrobacter freundii</i>  | MGH 56    | <=0.25           |        |                | SUSCEPTIBLE          |                                       |                      |
| Boston prospective | April-13        | Urine                         | <i>Citrobacter species</i>   | MGH 55    | 16               |        |                | NON-SUSCEPTIBLE      | blaKPC-4                              | truncated            |

| collection phase   | collection date | clinical sample type   | species                        | isolate  | MIC mero (ug/ml) | MLST   | cps prediction | resistance phenotype | genotype conferring resistance  | Tn4401 variant |
|--------------------|-----------------|------------------------|--------------------------------|----------|------------------|--------|----------------|----------------------|---------------------------------|----------------|
| Boston prospective | April-13        | Wound                  | <i>Enterobacter aerogenes</i>  | MGH_62   | <=0.25           |        |                | SUSCEPTIBLE          |                                 |                |
| Boston prospective | April-13        | Blood                  | <i>Enterobacter aerogenes</i>  | MGH_61   | 1                |        |                | SUSCEPTIBLE          |                                 |                |
| Boston prospective | April-13        | Urine                  | <i>Escherichia coli</i>        | MGH_58   | <=0.25           | ST69   |                | SUSCEPTIBLE          |                                 |                |
| Boston prospective | April-13        | Wound abscess          | <i>Escherichia coli</i>        | MGH_57   | >32              | ST156  |                | NON-SUSCEPTIBLE      | blaCTX-M-15 + OmpC(truncated)   |                |
| Boston prospective | April-13        | Sputum                 | <i>Klebsiella pneumoniae</i>   | MGH_60   | <=0.25           | ST17   |                | SUSCEPTIBLE          |                                 |                |
| Boston prospective | April-13        | Urine                  | <i>Klebsiella pneumoniae</i>   | MGH_64   | <=0.25           | ST35   |                | SUSCEPTIBLE          |                                 |                |
| Boston prospective | April-13        | Urine                  | <i>Klebsiella pneumoniae</i>   | MGH_59   | >4               | ST258  | II             | NON-SUSCEPTIBLE      | UNKNOWN                         |                |
| Boston prospective | April-13        | Bile (fluid)           | <i>Klebsiella pneumoniae</i>   | MGH_63   | 8                | ST15   |                | NON-SUSCEPTIBLE      | blaCTX-M-15 + OmpK35(truncated) |                |
| Boston prospective | May-13          | Urine                  | <i>Klebsiella pneumoniae</i>   | MGH_66   | <=0.25           | ST29   |                | SUSCEPTIBLE          |                                 |                |
| Boston prospective | May-13          | Urine                  | <i>Klebsiella pneumoniae</i>   | MGH_68   | <=0.25           | ST1166 |                | SUSCEPTIBLE          |                                 |                |
| Boston prospective | May-13          | Bile (fluid)           | <i>Klebsiella pneumoniae</i>   | MGH_65   | 8                | ST15   |                | NON-SUSCEPTIBLE      | blaCTX-M-15 + OmpK35(truncated) |                |
| Boston prospective | May-13          | Pleural Tissue         | <i>Klebsiella pneumoniae</i>   | MGH_67   | 16               | ST258  | II             | NON-SUSCEPTIBLE      | blaKPC-2                        | Tn4401a        |
| Boston prospective | June-13         | Urine                  | <i>Klebsiella pneumoniae</i>   | MGH_70   | <=0.25           | ST20   |                | SUSCEPTIBLE          |                                 |                |
| Boston prospective | June-13         | Urine                  | <i>Klebsiella pneumoniae</i>   | MGH_72   | <=0.25           | ST37   |                | SUSCEPTIBLE          |                                 |                |
| Boston prospective | June-13         | Urine                  | <i>Klebsiella pneumoniae</i>   | MGH_74   | <=0.25           | ST76   |                | SUSCEPTIBLE          |                                 |                |
| Boston prospective | June-13         | Sputum                 | <i>Klebsiella pneumoniae</i>   | MGH_69   | 16               | ST11   |                | NON-SUSCEPTIBLE      | NDM-1                           |                |
| Boston prospective | June-13         | Urine                  | <i>Klebsiella pneumoniae</i>   | MGH_71   | 16               | ST258  | I              | NON-SUSCEPTIBLE      | blaKPC-2                        | Tn4401a        |
| Boston prospective | June-13         | Wound - Deep Sinus     | <i>Klebsiella pneumoniae</i>   | MGH_73   | 16               | ST258  | II             | NON-SUSCEPTIBLE      | blaKPC-3                        | Tn4401b2       |
| Boston prospective | June-13         | Urine                  | <i>Acinetobacter baumannii</i> | BIDMC_56 | >32              | ST208  |                | NON-SUSCEPTIBLE      | OXA-113                         |                |
| Boston prospective | June-13         | Urine                  | <i>Klebsiella pneumoniae</i>   | BIDMC_54 | 8                | ST258  | II             | NON-SUSCEPTIBLE      | blaKPC-3                        | Tn4401b3       |
| Boston prospective | June-13         | Urine                  | <i>Klebsiella pneumoniae</i>   | BIDMC_55 | <=0.25           | ST105  |                | SUSCEPTIBLE          |                                 |                |
| Boston prospective | June-13         | Bronchoalveolar Lavage | <i>Acinetobacter baumannii</i> | BIDMC_57 | 1                | ST324  |                | SUSCEPTIBLE          |                                 |                |
| Boston prospective | July-13         | Urine                  | <i>Enterobacter aerogenes</i>  | MGH_78   | <=0.25           |        |                | SUSCEPTIBLE          |                                 |                |
| Boston prospective | July-13         | Wound - Abdominal      | <i>Enterobacter aerogenes</i>  | MGH_77   | >4               |        |                | NON-SUSCEPTIBLE      | UNKNOWN                         |                |
| Boston prospective | July-13         | Bile (fluid)           | <i>Klebsiella pneumoniae</i>   | MGH_76   | <=0.25           | ST837  |                | SUSCEPTIBLE          |                                 |                |
| Boston prospective | July-13         | Urine                  | <i>Klebsiella pneumoniae</i>   | MGH_80   | <=0.25           | ST1251 |                | SUSCEPTIBLE          |                                 |                |
| Boston prospective | July-13         | Wound - Abdominal      | <i>Klebsiella pneumoniae</i>   | MGH_75   | 4                | ST15   |                | NON-SUSCEPTIBLE      | blaCTX-M-15 + OmpK35(truncated) |                |
| Boston prospective | July-13         | Urine                  | <i>Klebsiella pneumoniae</i>   | MGH_79   | 16               | ST258  | II             | NON-SUSCEPTIBLE      | blaKPC-2                        | Tn4401a        |
| Boston prospective | July-13         | Urine                  | <i>Escherichia coli</i>        | BIDMC_70 | <=0.25           | ST131  |                | SUSCEPTIBLE          |                                 |                |
| Boston prospective | July-13         | Urine                  | <i>Escherichia coli</i>        | BIDMC_71 | <=0.25           | ST648  |                | SUSCEPTIBLE          |                                 |                |
| Boston prospective | July-13         | Urine                  | <i>Escherichia coli</i>        | BIDMC_72 | <=0.25           | ST1193 |                | SUSCEPTIBLE          |                                 |                |
| Boston prospective | July-13         | Urine                  | <i>Escherichia coli</i>        | BIDMC_73 | <=0.25           | ST1193 |                | SUSCEPTIBLE          |                                 |                |
| Boston prospective | July-13         | Urine                  | <i>Escherichia coli</i>        | BIDMC_74 | <=0.25           | ST1196 |                | SUSCEPTIBLE          |                                 |                |
| Boston prospective | July-13         | Urine                  | <i>Escherichia coli</i>        | BIDMC_75 | <=0.25           | ST131  |                | SUSCEPTIBLE          |                                 |                |
| Boston prospective | July-13         | Urine                  | <i>Escherichia coli</i>        | BIDMC_76 | <=0.25           | ST131  |                | SUSCEPTIBLE          |                                 |                |
| Boston prospective | July-13         | Urine                  | <i>Escherichia coli</i>        | BIDMC_79 | <=0.25           | ST131  |                | SUSCEPTIBLE          |                                 |                |
| Boston prospective | July-13         | Urine                  | <i>Escherichia coli</i>        | BIDMC_58 | 8                | ST131  |                | NON-SUSCEPTIBLE      | blaKPC-3                        | Tn4401d        |
| Boston prospective | August-13       | Urine                  | <i>Enterobacter cloacae</i>    | BWH_43   | <=0.25           | ST24   |                | SUSCEPTIBLE          |                                 |                |
| Boston prospective | August-13       | Peritoneal Fluid       | <i>Klebsiella pneumoniae</i>   | BIDMC_60 | 8                | ST258  | II             | NON-SUSCEPTIBLE      | blaKPC-2                        | Tn4401a        |
| Boston prospective | August-13       | Urine                  | <i>Klebsiella pneumoniae</i>   | BIDMC_61 | <=0.25           | ST697  |                | SUSCEPTIBLE          |                                 |                |
| Boston prospective | August-13       | Urine                  | <i>Escherichia coli</i>        | BIDMC_59 | <=0.25           | ST1304 |                | SUSCEPTIBLE          |                                 |                |
| Boston prospective | August-13       | Blood Culture          | <i>Escherichia coli</i>        | BIDMC_78 | <=0.25           | ST131  |                | SUSCEPTIBLE          |                                 |                |
| Boston prospective | August-13       | Bronchoalveolar Lavage | <i>Escherichia coli</i>        | BIDMC_62 | 8                | ST131  |                | NON-SUSCEPTIBLE      | blaKPC-3                        | Tn4401d        |
| Boston prospective | September-13    | Blood Culture          | <i>Escherichia coli</i>        | BIDMC_77 | <=0.25           | ST405  |                | SUSCEPTIBLE          |                                 |                |
| Boston prospective | September-13    | Sputum                 | <i>Klebsiella pneumoniae</i>   | BWH_46   | <=0.25           | ST592  |                | SUSCEPTIBLE          |                                 |                |
| Boston prospective | September-13    | Tissue                 | <i>Klebsiella pneumoniae</i>   | BWH_47   | 4                | ST258  | II             | NON-SUSCEPTIBLE      | blaKPC-3                        | Tn4401b2       |
| Boston prospective | September-13    | Tissue                 | <i>Klebsiella pneumoniae</i>   | BWH_45   | 8                | ST258  | II             | NON-SUSCEPTIBLE      | blaKPC-2                        | truncated      |
| Boston prospective | September-13    | Swab                   | <i>Escherichia coli</i>        | BIDMC_63 | <=0.25           | ST131  |                | SUSCEPTIBLE          |                                 |                |
| Boston prospective | September-13    | Urine                  | <i>Escherichia coli</i>        | BIDMC_64 | 8                | ST131  |                | NON-SUSCEPTIBLE      | blaKPC-3                        | Tn4401d        |
| Boston prospective | September-13    | Tissue                 | <i>Enterobacter cloacae</i>    | BIDMC_66 | 4                | ST64   |                | NON-SUSCEPTIBLE      | blaKPC-4                        | Tn4401b4       |
| Boston prospective | September-13    | Abscess                | <i>Escherichia coli</i>        | BIDMC_65 | <=0.25           | ST95   |                | SUSCEPTIBLE          |                                 |                |
| Boston prospective | September-13    | Abscess, Pelvic Drain  | <i>Enterobacter cloacae</i>    | BIDMC_67 | <=0.25           | ST33   |                | SUSCEPTIBLE          |                                 |                |
| Boston prospective | September-13    | Blood Culture          | <i>Klebsiella pneumoniae</i>   | BIDMC_68 | 8                | ST258  | II             | NON-SUSCEPTIBLE      | blaKPC-2                        | Tn4401a        |
| Boston prospective | September-13    | Sputum                 | <i>Klebsiella pneumoniae</i>   | BIDMC_69 | <=0.25           | ST17   |                | SUSCEPTIBLE          |                                 |                |
| Boston prospective | September-13    | Tissue                 | <i>Serratia marcescens</i>     | BIDMC_81 | <=0.25           |        |                | SUSCEPTIBLE          |                                 |                |
| Boston prospective | September-13    | Blood Culture          | <i>Serratia marcescens</i>     | BIDMC_80 | 8                |        |                | NON-SUSCEPTIBLE      | blaSME-2 + AmpC                 |                |
| Boston prospective | October-13      | Urine                  | <i>Klebsiella pneumoniae</i>   | BWH_48   | <=0.25           | ST17   |                | SUSCEPTIBLE          |                                 |                |
| Boston prospective | November-13     | Urine                  | <i>Escherichia coli</i>        | BIDMC_83 | <=0.25           | ST12   |                | SUSCEPTIBLE          |                                 |                |
| Boston prospective | November-13     | Urine                  | <i>Escherichia coli</i>        | BIDMC_82 | 8                | ST648  |                | NON-SUSCEPTIBLE      | blaKPC-2                        | truncated      |
| Irvine prospective | 2012            | Urine                  | <i>Enterobacter cloacae</i>    | UCI_11   | <=0.25           | ST50   |                | SUSCEPTIBLE          |                                 |                |
| Irvine prospective | 2012            | Bronchoalveolar Lavage | <i>Enterobacter cloacae</i>    | UCI_12   | <=0.25           | ST40   |                | SUSCEPTIBLE          |                                 |                |
| Irvine prospective | 2012            | Sputum                 | <i>Enterobacter cloacae</i>    | UCI_3    | <=0.25           | ST58   |                | SUSCEPTIBLE          |                                 |                |
| Irvine prospective | 2012            | Perirectal abscess     | <i>Enterobacter cloacae</i>    | UCI_5    | <=0.25           | ST45   |                | SUSCEPTIBLE          |                                 |                |
| Irvine prospective | 2012            | Sputum                 | <i>Enterobacter cloacae</i>    | UCI_9    | <=0.25           | ST58   |                | SUSCEPTIBLE          |                                 |                |
| Irvine prospective | 2012            | Blood                  | <i>Klebsiella pneumoniae</i>   | UCI_10   | <=0.25           | ST596  |                | SUSCEPTIBLE          |                                 |                |
| Irvine prospective | 2012            | Sputum                 | <i>Klebsiella pneumoniae</i>   | UCI_14   | <=0.25           | ST1091 |                | SUSCEPTIBLE          |                                 |                |
| Irvine prospective | 2012            | Sputum                 | <i>Klebsiella pneumoniae</i>   | UCI_2    | <=0.25           | ST37   |                | SUSCEPTIBLE          |                                 |                |
| Irvine prospective | 2012            | Blood                  | <i>Klebsiella pneumoniae</i>   | UCI_4    | <=0.25           | ST14   |                | SUSCEPTIBLE          |                                 |                |
| Irvine prospective | 2012            | Sputum                 | <i>Klebsiella pneumoniae</i>   | UCI_6    | <=0.25           | ST86   |                | SUSCEPTIBLE          |                                 |                |
| Irvine prospective | 2012            | Urine                  | <i>Klebsiella pneumoniae</i>   | UCI_7    | <=0.25           | ST17   |                | SUSCEPTIBLE          |                                 |                |
| Irvine prospective | 2012            | Urine                  | <i>Klebsiella pneumoniae</i>   | UCI_8    | <=0.25           | ST1198 |                | SUSCEPTIBLE          |                                 |                |

| collection phase   | collection date | clinical sample type        | species                       | isolate | MIC mero (ug/ml) | MLST   | cps prediction | resistance phenotype | genotype conferring resistance | Tn4401 variant |
|--------------------|-----------------|-----------------------------|-------------------------------|---------|------------------|--------|----------------|----------------------|--------------------------------|----------------|
| Irvine prospective | 2012            | Sputum                      | <i>Klebsiella pneumoniae</i>  | UCI_1   | >=16             | ST258  | II             | NON-SUSCEPTIBLE      | blaKPC-3                       | Tn4401i        |
| Irvine prospective | 2012            | Urine                       | <i>Klebsiella pneumoniae</i>  | UCI_13  | >=16             | ST258  | I              | NON-SUSCEPTIBLE      | blaKPC-2                       | Tn4401a        |
| Irvine prospective | 2013            | Urine                       | <i>Citrobacter freundii</i>   | UCI_31  | <=0.25           |        |                | SUSCEPTIBLE          |                                |                |
| Irvine prospective | 2013            | Urine                       | <i>Citrobacter freundii</i>   | UCI_32  | <=0.25           |        |                | SUSCEPTIBLE          |                                |                |
| Irvine prospective | 2013            | Sputum                      | <i>Enterobacter aerogenes</i> | UCI_45  | <=0.25           |        |                | SUSCEPTIBLE          |                                |                |
| Irvine prospective | 2013            | Blood                       | <i>Enterobacter aerogenes</i> | UCI_16  | <=0.25           |        |                | SUSCEPTIBLE          |                                |                |
| Irvine prospective | 2013            | Drainage                    | <i>Enterobacter aerogenes</i> | UCI_28  | <=0.25           |        |                | SUSCEPTIBLE          |                                |                |
| Irvine prospective | 2013            | CSF                         | <i>Enterobacter aerogenes</i> | UCI_46  | <=0.25           |        |                | SUSCEPTIBLE          |                                |                |
| Irvine prospective | 2013            | Sputum                      | <i>Enterobacter aerogenes</i> | UCI_48  | <=0.25           |        |                | SUSCEPTIBLE          |                                |                |
| Irvine prospective | 2013            | Sputum                      | <i>Enterobacter aerogenes</i> | UCI_47  | 1                |        |                | SUSCEPTIBLE          |                                |                |
| Irvine prospective | 2013            | Blood                       | <i>Enterobacter aerogenes</i> | UCI_27  | 2                |        |                | NON-SUSCEPTIBLE      | UNKNOWN                        |                |
| Irvine prospective | 2013            | Aspirate                    | <i>Enterobacter aerogenes</i> | UCI_15  | >32              |        |                | NON-SUSCEPTIBLE      | UNKNOWN                        |                |
| Irvine prospective | 2013            | Aspirate                    | <i>Enterobacter cloacae</i>   | UCI_23  | <=0.25           | ST80   |                | SUSCEPTIBLE          |                                |                |
| Irvine prospective | 2013            | Urine                       | <i>Enterobacter cloacae</i>   | UCI_24  | <=0.25           | ST32   |                | SUSCEPTIBLE          |                                |                |
| Irvine prospective | 2013            | Urine                       | <i>Enterobacter cloacae</i>   | UCI_30  | <=0.25           | ST9    |                | SUSCEPTIBLE          |                                |                |
| Irvine prospective | 2013            | Tissue                      | <i>Enterobacter cloacae</i>   | UCI_36  | <=0.25           | ST60   |                | SUSCEPTIBLE          |                                |                |
| Irvine prospective | 2013            | Urine                       | <i>Enterobacter cloacae</i>   | UCI_39  | <=0.25           | ST40   |                | SUSCEPTIBLE          |                                |                |
| Irvine prospective | 2013            | Urine                       | <i>Enterobacter cloacae</i>   | UCI_49  | <=0.25           | ST28   |                | SUSCEPTIBLE          |                                |                |
| Irvine prospective | 2013            | Aspirate, JP drain          | <i>Enterobacter cloacae</i>   | UCI_50  | <=0.25           | ST58   |                | SUSCEPTIBLE          |                                |                |
| Irvine prospective | 2013            | Blood                       | <i>Enterobacter cloacae</i>   | UCI_29  | 2                | ST32   |                | NON-SUSCEPTIBLE      | UNKNOWN                        |                |
| Irvine prospective | 2013            | Surgical Procedure Specimen | <i>Enterobacter cloacae</i>   | UCI_35  | 4                | ST60   |                | NON-SUSCEPTIBLE      | UNKNOWN                        |                |
| Irvine prospective | 2013            | Urine                       | <i>Escherichia coli</i>       | UCI_57  | <=0.25           | ST2071 |                | SUSCEPTIBLE          |                                |                |
| Irvine prospective | 2013            | Urine                       | <i>Escherichia coli</i>       | UCI_58  | <=0.25           | ST2071 |                | SUSCEPTIBLE          |                                |                |
| Irvine prospective | 2013            | Urine                       | <i>Escherichia coli</i>       | UCI_65  | <=0.25           | ST38   |                | SUSCEPTIBLE          |                                |                |
| Irvine prospective | 2013            | Urine                       | <i>Escherichia coli</i>       | UCI_66  | <=0.25           | ST88   |                | SUSCEPTIBLE          |                                |                |
| Irvine prospective | 2013            | Aspirate, biliary drain     | <i>Escherichia coli</i>       | UCI_53  | 2                | ST410  |                | NON-SUSCEPTIBLE      | UNKNOWN                        |                |
| Irvine prospective | 2013            | Urine                       | <i>Escherichia coli</i>       | UCI_51  | >=4              | ST131  |                | NON-SUSCEPTIBLE      | UNKNOWN                        |                |
| Irvine prospective | 2013            | Urine                       | <i>Klebsiella pneumoniae</i>  | UCI_18  | <=0.25           | ST641  |                | SUSCEPTIBLE          |                                |                |
| Irvine prospective | 2013            | Urine                       | <i>Klebsiella pneumoniae</i>  | UCI_20  | <=0.25           | ST268  |                | SUSCEPTIBLE          |                                |                |
| Irvine prospective | 2013            | Sputum                      | <i>Klebsiella pneumoniae</i>  | UCI_22  | <=0.25           | ST258  | UNKNOWN        | SUSCEPTIBLE          |                                |                |
| Irvine prospective | 2013            | Urine                       | <i>Klebsiella pneumoniae</i>  | UCI_26  | <=0.25           | ST322  |                | SUSCEPTIBLE          |                                |                |
| Irvine prospective | 2013            | Urine                       | <i>Klebsiella pneumoniae</i>  | UCI_34  | <=0.25           | ST34   |                | SUSCEPTIBLE          |                                |                |
| Irvine prospective | 2013            | Urine                       | <i>Klebsiella pneumoniae</i>  | UCI_38  | <=0.25           | ST258  | II             | SUSCEPTIBLE          |                                |                |
| Irvine prospective | 2013            | Sputum                      | <i>Klebsiella pneumoniae</i>  | UCI_42  | <=0.25           | ST86   |                | SUSCEPTIBLE          |                                |                |
| Irvine prospective | 2013            | Urine                       | <i>Klebsiella pneumoniae</i>  | UCI_43  | <=0.25           | ST258  | II             | SUSCEPTIBLE          |                                |                |
| Irvine prospective | 2013            | Urine                       | <i>Klebsiella pneumoniae</i>  | UCI_44  | <=0.25           | ST258  | II             | SUSCEPTIBLE          |                                |                |
| Irvine prospective | 2013            | Sputum                      | <i>Klebsiella pneumoniae</i>  | UCI_56  | <=0.25           | ST678  |                | SUSCEPTIBLE          |                                |                |
| Irvine prospective | 2013            | Urine                       | <i>Klebsiella pneumoniae</i>  | UCI_60  | <=0.25           | ST728  |                | SUSCEPTIBLE          |                                |                |
| Irvine prospective | 2013            | Urine                       | <i>Klebsiella pneumoniae</i>  | UCI_62  | <=0.25           | ST34   |                | SUSCEPTIBLE          |                                |                |
| Irvine prospective | 2013            | Urine                       | <i>Klebsiella pneumoniae</i>  | UCI_64  | <=0.25           | ST17   |                | SUSCEPTIBLE          |                                |                |
| Irvine prospective | 2013            | Urine                       | <i>Klebsiella pneumoniae</i>  | UCI_68  | <=0.25           | ST37   |                | SUSCEPTIBLE          |                                |                |
| Irvine prospective | 2013            | Urine                       | <i>Klebsiella pneumoniae</i>  | UCI_25  | >=4              | ST873  |                | NON-SUSCEPTIBLE      | UNKNOWN                        |                |
| Irvine prospective | 2013            | Urine                       | <i>Klebsiella pneumoniae</i>  | UCI_19  | >=16             | ST258  | I              | NON-SUSCEPTIBLE      | blaKPC-2                       | Tn4401a        |
| Irvine prospective | 2013            | rectal                      | <i>Klebsiella pneumoniae</i>  | UCI_21  | >=16             | ST258  | I              | NON-SUSCEPTIBLE      | blaKPC-2                       | unique         |
| Irvine prospective | 2013            | Urine                       | <i>Klebsiella pneumoniae</i>  | UCI_33  | >=16             | ST258  | II             | NON-SUSCEPTIBLE      | blaKPC-3                       | Tn4401d        |
| Irvine prospective | 2013            | Urine                       | <i>Klebsiella pneumoniae</i>  | UCI_37  | >=16             | ST258  | II             | NON-SUSCEPTIBLE      | blaKPC-3                       | Tn4401d        |
| Irvine prospective | 2013            | Urine                       | <i>Klebsiella pneumoniae</i>  | UCI_41  | >=16             | ST258  | II             | NON-SUSCEPTIBLE      | blaKPC-3                       | Tn4401d        |
| Irvine prospective | 2013            | Wound                       | <i>Klebsiella pneumoniae</i>  | UCI_55  | 16               | ST258  | II             | NON-SUSCEPTIBLE      | blaKPC-3                       | Tn4401d        |
| Irvine prospective | 2013            | Wound                       | <i>Klebsiella pneumoniae</i>  | UCI_59  | 16               | ST258  | I              | NON-SUSCEPTIBLE      | blaKPC-2                       | Tn4401a        |
| Irvine prospective | 2013            | Urine                       | <i>Klebsiella pneumoniae</i>  | UCI_61  | 16               | ST258  | UNKNOWN        | NON-SUSCEPTIBLE      | blaKPC-2                       | Tn4401a        |
| Irvine prospective | 2013            | Wound                       | <i>Klebsiella pneumoniae</i>  | UCI_63  | 16               | ST258  | I              | NON-SUSCEPTIBLE      | blaKPC-2                       | Tn4401a        |
| Irvine prospective | 2013            | Sputum                      | <i>Klebsiella pneumoniae</i>  | UCI_67  | 16               | ST258  | II             | NON-SUSCEPTIBLE      | blaKPC-3                       | Tn4401i        |
| Irvine prospective | 2013            | Urine                       | <i>Klebsiella pneumoniae</i>  | UCI_17  | >32              | ST437  |                | NON-SUSCEPTIBLE      | blaKPC-2                       | Tn4401a        |

**Table S2. Breakdown of number of meropenem non-susceptible and susceptible strains and STs in Boston Prospective Collection by species**

|                                | Number of NON-SUSCEPTIBLE strains | Number of SUSCEPTIBLE strains | Number of NON-SUSCEPTIBLE STs | Number of SUSCEPTIBLE STs |
|--------------------------------|-----------------------------------|-------------------------------|-------------------------------|---------------------------|
| <i>Klebsiella pneumoniae</i>   | 32                                | 44                            | 9                             | 35                        |
| <i>Enterobacter cloacae</i>    | 7                                 | 20                            | 4                             | 16                        |
| <i>Escherichia coli</i>        | 9                                 | 21                            | 4                             | 12                        |
| <i>Klebsiella oxytoca</i>      | 2                                 | 2                             | -                             | -                         |
| <i>Serratia marcescens</i>     | 2                                 | 2                             | -                             | -                         |
| <i>Enterobacter aerogenes</i>  | 1                                 | 3                             | -                             | -                         |
| <i>Acinetobacter baumannii</i> | 1                                 | 1                             | 1                             | 1                         |
| <i>Citrobacter species</i>     | 1                                 | 1                             | -                             | -                         |
| TOTALS                         | 55                                | 94                            | 18                            | 64                        |



**Table S3. Breakdown of number of strains in Boston Prospective Collection, Boston Historical Collection and Irvine Prospective Collection by phenotype and STs**

|                                       | Boston Prospective |              | Boston Historical |             | Irvine Prospective |             |
|---------------------------------------|--------------------|--------------|-------------------|-------------|--------------------|-------------|
|                                       | Non-susceptible    | Susceptibles | Non-susceptible   | Susceptible | Non-susceptible    | Susceptible |
| <b>Total</b>                          | 55                 | 94           | 47                | 2           | 20                 | 45          |
| <b>Overall total</b>                  | 149                |              | 49                |             | 65                 |             |
| <i>Klebsiella pneumoniae</i> _ST258   | 19                 | 1            | 17                | 0           | 12                 | 4           |
| <i>Escherichia coli</i> _ST131        | 4                  | 7            | 3                 | 0           | 1                  | 0           |
| <i>Klebsiella pneumoniae</i> _ST15    | 4                  | 0            | 0                 | 0           | 0                  | 0           |
| <i>Escherichia coli</i> _ST648        | 3                  | 1            | 10                | 0           | 0                  | 0           |
| <i>Enterobacter cloacae</i> _ST64     | 3                  | 0            | 1                 | 0           | 0                  | 0           |
| <i>Klebsiella pneumoniae</i> _ST37    | 3                  | 5            | 0                 | 1           | 0                  | 2           |
| <i>Enterobacter aerogenes</i> _       | 1                  | 3            | 0                 | 0           | 2                  | 6           |
| <i>Enterobacter cloacae</i> _ST54     | 1                  | 1            | 0                 | 0           | 0                  | 0           |
| <i>Enterobacter cloacae</i> _ST78     | 2                  | 1            | 5                 | 1           | 0                  | 0           |
| <i>Klebsiella oxytoca</i> _           | 2                  | 2            | 0                 | 0           | 0                  | 0           |
| <i>Serratia marcesens</i> _           | 2                  | 2            | 0                 | 0           | 0                  | 0           |
| <i>Acinetobacter baumannii</i> _ST208 | 1                  | 0            | 0                 | 0           | 0                  | 0           |
| <i>Acinetobacter baumannii</i> _ST324 | 0                  | 1            | 0                 | 0           | 0                  | 0           |
| <i>Citrobacter species</i> _          | 1                  | 0            | 0                 | 0           | 0                  | 0           |
| <i>Enterobacter cloacae</i> _ST40     | 0                  | 2            | 0                 | 0           | 0                  | 2           |
| <i>Enterobacter cloacae</i> _ST45     | 1                  | 0            | 3                 | 0           | 0                  | 1           |
| <i>Enterobacter cloacae</i> _ST51     | 0                  | 3            | 0                 | 0           | 0                  | 0           |
| <i>Escherichia coli</i> _ST156        | 1                  | 0            | 0                 | 0           | 0                  | 0           |
| <i>Escherichia coli</i> _ST405        | 1                  | 1            | 0                 | 0           | 0                  | 0           |
| <i>Klebsiella pneumoniae</i> _ST1084  | 1                  | 0            | 0                 | 0           | 0                  | 0           |
| <i>Klebsiella pneumoniae</i> _ST11    | 1                  | 0            | 0                 | 0           | 0                  | 0           |
| <i>Klebsiella pneumoniae</i> _ST1138  | 1                  | 0            | 0                 | 0           | 0                  | 0           |
| <i>Klebsiella pneumoniae</i> _ST17    | 1                  | 3            | 0                 | 0           | 0                  | 2           |
| <i>Klebsiella pneumoniae</i> _ST307   | 1                  | 0            | 0                 | 0           | 0                  | 0           |
| <i>Klebsiella pneumoniae</i> _ST392   | 1                  | 0            | 0                 | 0           | 0                  | 0           |
| <i>Citrobacter freundii</i> _         | 0                  | 1            | 0                 | 0           | 0                  | 2           |
| <i>Enterobacter cloacae</i> _ST12     | 0                  | 1            | 0                 | 0           | 0                  | 0           |
| <i>Enterobacter cloacae</i> _ST16     | 0                  | 1            | 0                 | 0           | 0                  | 0           |
| <i>Enterobacter cloacae</i> _ST22     | 0                  | 1            | 0                 | 0           | 0                  | 0           |

|                              | Boston Prospective |              | Boston Historical |             | Irvine Prospective |             |
|------------------------------|--------------------|--------------|-------------------|-------------|--------------------|-------------|
|                              | Non-susceptible    | Susceptibles | Non-susceptible   | Susceptible | Non-susceptible    | Susceptible |
| Enterobacter_cloacae_ST24    | 0                  | 1            | 0                 | 0           | 0                  | 0           |
| Enterobacter_cloacae_ST28    | 0                  | 0            | 0                 | 0           | 0                  | 1           |
| Enterobacter_cloacae_ST32    | 0                  | 2            | 0                 | 0           | 1                  | 1           |
| Enterobacter_cloacae_ST33    | 0                  | 1            | 0                 | 0           | 0                  | 0           |
| Enterobacter_cloacae_ST37    | 0                  | 1            | 0                 | 0           | 0                  | 0           |
| Enterobacter_cloacae_ST39    | 0                  | 1            | 0                 | 0           | 0                  | 0           |
| Enterobacter_cloacae_ST50    | 0                  | 1            | 0                 | 0           | 0                  | 1           |
| Enterobacter_cloacae_ST53    | 0                  | 1            | 0                 | 0           | 0                  | 0           |
| Enterobacter_cloacae_ST58    | 0                  | 0            | 2                 | 0           | 0                  | 3           |
| Enterobacter_cloacae_ST60    | 0                  | 1            | 0                 | 0           | 1                  | 1           |
| Enterobacter_cloacae_ST63    | 0                  | 0            | 1                 | 0           | 0                  | 0           |
| Enterobacter_cloacae_ST66    | 0                  | 1            | 2                 | 0           | 0                  | 0           |
| Enterobacter_cloacae_ST80    | 0                  | 0            | 0                 | 0           | 0                  | 1           |
| Enterobacter_cloacae_ST9     | 0                  | 0            | 0                 | 0           | 0                  | 1           |
| Escherichia_coli_ST1193      | 0                  | 2            | 0                 | 0           | 0                  | 0           |
| Escherichia_coli_ST1196      | 0                  | 1            | 0                 | 0           | 0                  | 0           |
| Escherichia_coli_ST12        | 0                  | 1            | 0                 | 0           | 0                  | 0           |
| Escherichia_coli_ST1304      | 0                  | 1            | 0                 | 0           | 0                  | 0           |
| Escherichia_coli_ST1421      | 0                  | 1            | 0                 | 0           | 0                  | 0           |
| Escherichia_coli_ST206       | 0                  | 1            | 0                 | 0           | 0                  | 0           |
| Escherichia_coli_ST2071      | 0                  | 0            | 0                 | 0           | 0                  | 2           |
| Escherichia_coli_ST3254      | 0                  | 1            | 0                 | 0           | 0                  | 0           |
| Escherichia_coli_ST38        | 0                  | 0            | 0                 | 0           | 0                  | 1           |
| Escherichia_coli_ST410       | 0                  | 0            | 0                 | 0           | 1                  | 0           |
| Escherichia_coli_ST69        | 0                  | 1            | 0                 | 0           | 0                  | 0           |
| Escherichia_coli_ST88        | 0                  | 0            | 0                 | 0           | 0                  | 1           |
| Escherichia_coli_ST95        | 0                  | 3            | 0                 | 0           | 0                  | 0           |
| Klebsiella_pneumoniae_ST101  | 0                  | 0            | 1                 | 0           | 0                  | 0           |
| Klebsiella_pneumoniae_ST105  | 0                  | 1            | 0                 | 0           | 0                  | 0           |
| Klebsiella_pneumoniae_ST1091 | 0                  | 0            | 0                 | 0           | 0                  | 1           |
| Klebsiella_pneumoniae_ST111  | 0                  | 3            | 0                 | 0           | 0                  | 0           |
| Klebsiella_pneumoniae_ST113  | 0                  | 0            | 1                 | 0           | 0                  | 0           |
| Klebsiella_pneumoniae_ST1164 | 0                  | 1            | 0                 | 0           | 0                  | 0           |
| Klebsiella_pneumoniae_ST1166 | 0                  | 1            | 0                 | 0           | 0                  | 0           |

|                              | Boston Prospective |              | Boston Historical |             | Irvine Prospective |             |
|------------------------------|--------------------|--------------|-------------------|-------------|--------------------|-------------|
|                              | Non-susceptible    | Susceptibles | Non-susceptible   | Susceptible | Non-susceptible    | Susceptible |
| Klebsiella_pneumoniae_ST1189 | 0                  | 1            | 0                 | 0           | 0                  | 0           |
| Klebsiella_pneumoniae_ST1198 | 0                  | 0            | 0                 | 0           | 0                  | 1           |
| Klebsiella_pneumoniae_ST1251 | 0                  | 1            | 0                 | 0           | 0                  | 0           |
| Klebsiella_pneumoniae_ST133  | 0                  | 1            | 0                 | 0           | 0                  | 0           |
| Klebsiella_pneumoniae_ST134  | 0                  | 1            | 0                 | 0           | 0                  | 0           |
| Klebsiella_pneumoniae_ST14   | 0                  | 1            | 1                 | 0           | 0                  | 1           |
| Klebsiella_pneumoniae_ST186  | 0                  | 1            | 0                 | 0           | 0                  | 0           |
| Klebsiella_pneumoniae_ST189  | 0                  | 1            | 0                 | 0           | 0                  | 0           |
| Klebsiella_pneumoniae_ST20   | 0                  | 2            | 0                 | 0           | 0                  | 0           |
| Klebsiella_pneumoniae_ST209  | 0                  | 1            | 0                 | 0           | 0                  | 0           |
| Klebsiella_pneumoniae_ST268  | 0                  | 0            | 0                 | 0           | 0                  | 1           |
| Klebsiella_pneumoniae_ST29   | 0                  | 1            | 0                 | 0           | 0                  | 0           |
| Klebsiella_pneumoniae_ST322  | 0                  | 0            | 0                 | 0           | 0                  | 1           |
| Klebsiella_pneumoniae_ST34   | 0                  | 1            | 0                 | 0           | 0                  | 2           |
| Klebsiella_pneumoniae_ST35   | 0                  | 1            | 0                 | 0           | 0                  | 0           |
| Klebsiella_pneumoniae_ST355  | 0                  | 1            | 0                 | 0           | 0                  | 0           |
| Klebsiella_pneumoniae_ST36   | 0                  | 1            | 0                 | 0           | 0                  | 0           |
| Klebsiella_pneumoniae_ST372  | 0                  | 1            | 0                 | 0           | 0                  | 0           |
| Klebsiella_pneumoniae_ST437  | 0                  | 0            | 0                 | 0           | 1                  | 0           |
| Klebsiella_pneumoniae_ST466  | 0                  | 1            | 0                 | 0           | 0                  | 0           |
| Klebsiella_pneumoniae_ST502  | 0                  | 1            | 0                 | 0           | 0                  | 0           |
| Klebsiella_pneumoniae_ST540  | 0                  | 1            | 0                 | 0           | 0                  | 0           |
| Klebsiella_pneumoniae_ST592  | 0                  | 1            | 0                 | 0           | 0                  | 0           |
| Klebsiella_pneumoniae_ST596  | 0                  | 0            | 0                 | 0           | 0                  | 1           |
| Klebsiella_pneumoniae_ST613  | 0                  | 1            | 0                 | 0           | 0                  | 0           |
| Klebsiella_pneumoniae_ST628  | 0                  | 1            | 0                 | 0           | 0                  | 0           |
| Klebsiella_pneumoniae_ST641  | 0                  | 0            | 0                 | 0           | 0                  | 1           |
| Klebsiella_pneumoniae_ST661  | 0                  | 1            | 0                 | 0           | 0                  | 0           |
| Klebsiella_pneumoniae_ST678  | 0                  | 0            | 0                 | 0           | 0                  | 1           |
| Klebsiella_pneumoniae_ST697  | 0                  | 1            | 0                 | 0           | 0                  | 0           |
| Klebsiella_pneumoniae_ST70   | 0                  | 1            | 0                 | 0           | 0                  | 0           |
| Klebsiella_pneumoniae_ST728  | 0                  | 0            | 0                 | 0           | 0                  | 1           |
| Klebsiella_pneumoniae_ST76   | 0                  | 1            | 0                 | 0           | 0                  | 0           |
| Klebsiella_pneumoniae_ST797  | 0                  | 1            | 0                 | 0           | 0                  | 0           |

|                             | Boston Prospective |              | Boston Historical |             | Irvine Prospective |             |
|-----------------------------|--------------------|--------------|-------------------|-------------|--------------------|-------------|
|                             | Non-susceptible    | Susceptibles | Non-susceptible   | Susceptible | Non-susceptible    | Susceptible |
| Klebsiella_pneumoniae_ST837 | 0                  | 1            | 0                 | 0           | 0                  | 0           |
| Klebsiella_pneumoniae_ST86  | 0                  | 0            | 0                 | 0           | 0                  | 2           |
| Klebsiella_pneumoniae_ST873 | 0                  | 0            | 0                 | 0           | 1                  | 0           |
| Klebsiella_pneumoniae_ST988 | 0                  | 1            | 0                 | 0           | 0                  | 0           |

**Table S4. Breakdown of number of meropenem non-susceptible strains in Boston Prospective Collection, Boston Historical Collection and Irvine Prospective Collection by predicted resistance determinant.**

|                                          | BOSTON PROSPECTIVE COLLECTION | BOSTON HISTORICAL COLLECTION | IRVINE PROSPECTIVE COLLECTION | TOTAL |
|------------------------------------------|-------------------------------|------------------------------|-------------------------------|-------|
| KPC                                      | 36                            | 44                           | 13                            | 93    |
| KPC-3                                    | 16                            | 21                           | 6                             | 43    |
| KPC-2                                    | 15                            | 16                           | 7                             | 38    |
| KPC-4                                    | 5                             | 7                            | 0                             | 12    |
| NDM-1                                    | 1                             | 1                            | 0                             | 2     |
| OXA-48                                   | 0                             | 1                            | 0                             | 1     |
| SME-2 + AmpC                             | 2                             | 0                            | 0                             | 2     |
| OXA-113                                  | 1                             | 0                            | 0                             | 1     |
| CTX-M-15 + OmpK35(truncated)             | 3                             | 0                            | 0                             | 3     |
| CTX-M-15 + OmpK36(truncated)             | 2                             | 0                            | 0                             | 2     |
| CTX-M-15 + OmpF(truncated)               | 1                             | 0                            | 0                             | 1     |
| CTX-M-15 + OmpC(truncated)               | 1                             | 0                            | 0                             | 1     |
| OmpK35(truncated) +<br>OmpK36(truncated) | 1                             | 0                            | 0                             | 1     |
| Non-susceptible unknown                  | 7                             | 1                            | 7                             | 15    |
| SUM                                      | 55                            | 47                           | 20                            | 122   |



Species  
Accession  
ST  
meropenem  
Genetic determinant of resistance

| species  | isolate name | City/Collection    | ST        | meropenem<br>MIC (µg/ml) | Genetic determinant of resistance |
|----------|--------------|--------------------|-----------|--------------------------|-----------------------------------|
| ecobaeae | MGH_1        | Boston historical  | ST148 N   | >=16 RPC-2               |                                   |
| ecobaeae | MGH_6        | Boston historical  | ST145 N   | >=16 RPC-2               |                                   |
| ecobaeae | MGH_13       | Boston historical  | ST156 N   | >=16 RPC-3               |                                   |
| ecobaeae | MGH_14       | Boston historical  | ST146 N   | >=16 RPC-3               |                                   |
| ecobaeae | MGH_15       | Boston prospective | ST145 N   | >=16 RPC-3               |                                   |
| ecobaeae | MGH_5        | Boston historical  | ST146 N   | >=16 RPC-3               |                                   |
| ecobaeae | MGH_7        | Boston historical  | ST146 N   | >=16 RPC-3               |                                   |
| ecobaeae | MGH_2        | Boston historical  | ST178 N   | >=16 RPC-4               |                                   |
| ecobaeae | MGH_11       | Boston historical  | ST178 N   | >=16 RPC-4               |                                   |
| ecobaeae | MGH_10       | Boston historical  | ST178 N   | >=16 RPC-4               |                                   |
| ecobaeae | BWH_27       | Boston prospective | ST178 N   | >=16 RPC-4               |                                   |
| ecobaeae | BIDMC_33A    | Boston prospective | ST164 N   | 4 RPC-3                  |                                   |
| ecobaeae | BIDMC_5      | Boston historical  | ST160 N   | 8 RPC-3                  |                                   |
| ecobaeae | MGH_12       | Boston historical  | ST178 N   | 8 RPC-4                  |                                   |
| ecobaeae | MGH_9        | Boston historical  | ST178 N   | 8 RPC-4                  |                                   |
| ecobaeae | BIDMC_64     | Boston prospective | ST164 N   | 8 RPC-4                  |                                   |
| ecobaeae | MGH_37       | Boston prospective | ST154 N   | 4 UNKNOWN                |                                   |
| ecobaeae | MGH_4        | ST158 N            | 4 UNKNOWN |                          |                                   |
| ecobaeae | UCI_25       | ST160 N            | 4 UNKNOWN |                          |                                   |
| ecobaeae | UCI_29       | ST172 N            | 2 UNKNOWN |                          |                                   |
| ecobaeae | BWH_37       | ST174 N            | 2 RPC-4   |                          |                                   |
| ecobaeae | MGH_39       | ST178 N            | 2 RPC-4   |                          |                                   |
| ecobaeae | MGH_14       | ST145 S            | 1         |                          |                                   |
| ecobaeae | MGH_18       | ST151 S            | 0.5       |                          |                                   |
| ecobaeae | MGH_25       | ST175 S            | 0.5       |                          |                                   |
| ecobaeae | BIDMC_26     | ST172 S            | <=0.25    |                          |                                   |
| ecobaeae | BIDMC_27     | ST150 S            | <=0.25    |                          |                                   |
| ecobaeae | BIDMC_28     | ST173 S            | <=0.25    |                          |                                   |
| ecobaeae | BIDMC_29     | ST173 S            | <=0.25    |                          |                                   |
| ecobaeae | BIDMC_30     | ST116 S            | <=0.25    |                          |                                   |
| ecobaeae | BIDMC_47     | ST133 S            | <=0.25    |                          |                                   |
| ecobaeae | BWH_29       | ST160 S            | <=0.25    |                          |                                   |
| ecobaeae | BWH_31       | ST153 S            | <=0.25    |                          |                                   |
| ecobaeae | BWH_43       | ST174 S            | <=0.25    |                          |                                   |
| ecobaeae | MGH_16       | ST140 S            | <=0.25    |                          |                                   |
| ecobaeae | MGH_22       | ST152 S            | <=0.25    |                          |                                   |
| ecobaeae | MGH_23       | ST152 S            | <=0.25    |                          |                                   |
| ecobaeae | MGH_24       | ST172 S            | <=0.25    |                          |                                   |
| ecobaeae | MGH_26       | ST178 S            | <=0.25    |                          |                                   |
| ecobaeae | MGH_34       | ST178 S            | <=0.25    |                          |                                   |
| ecobaeae | MGH_38       | ST166 S            | <=0.25    |                          |                                   |
| ecobaeae | UCI_11       | ST170 S            | <=0.25    |                          |                                   |
| ecobaeae | UCI_12       | ST140 S            | <=0.25    |                          |                                   |
| ecobaeae | UCI_23       | ST180 S            | <=0.25    |                          |                                   |
| ecobaeae | UCI_24       | ST152 S            | <=0.25    |                          |                                   |
| ecobaeae | UCI_3        | ST158 S            | <=0.25    |                          |                                   |
| ecobaeae | UCI_30       | ST19 S             | <=0.25    |                          |                                   |
| ecobaeae | UCI_36       | ST160 S            | <=0.25    |                          |                                   |
| ecobaeae | UCI_39       | ST140 S            | <=0.25    |                          |                                   |
| ecobaeae | UCI_49       | ST175 S            | <=0.25    |                          |                                   |
| ecobaeae | UCI_5        | ST140 S            | <=0.25    |                          |                                   |
| ecobaeae | UCI_50       | ST178 S            | <=0.25    |                          |                                   |
| ecobaeae | UCI_9        | ST158 S            | <=0.25    |                          |                                   |
| ecobaeae | MGH_33       | ST151 S            | <=0.25    |                          |                                   |

Genes associated with resistance to  
beta-lactams

Porins; red (gene present/Intact = less impact on resistance; green (absent/truncated, low similarity with reference) = likely to contribute to phenotype

Genes associated with resistance to  
aminoglycoside  
bacitracin  
bractracin  
chitranaphthol  
fosfomicin  
kasugamycin  
macrolide  
polymyxin  
resistance to phenicol  
quinolone  
rifampin  
rifampicin  
sulphonamide  
sulphonamide  
sulphonamide  
tetracycline  
trimethoprim  
multidrug efflux pump

| Species | Accession | ST | meropenem MIC (µg/ml) | Genetic determinant of resistance | ampC | ampC2 | ampC3 | ampC4 | ampC5 | ampC6 | ampC7 | ampC8 | ampC9 | ampC10 | ampC11 | ampC12 | ampC13 | ampC14 | ampC15 | ampC16 | ampC17 | ampC18 | ampC19 | ampC20 | ampC21 | ampC22 | ampC23 | ampC24 | ampC25 | ampC26 | ampC27 | ampC28 | ampC29 | ampC30 | ampC31 | ampC32 | ampC33 | ampC34 | ampC35 | ampC36 | ampC37 | ampC38 | ampC39 | ampC40 | ampC41 | ampC42 | ampC43 | ampC44 | ampC45 | ampC46 | ampC47 | ampC48 | ampC49 | ampC50 | ampC51 | ampC52 | ampC53 | ampC54 | ampC55 | ampC56 | ampC57 | ampC58 | ampC59 | ampC60 | ampC61 | ampC62 | ampC63 | ampC64 | ampC65 | ampC66 | ampC67 | ampC68 | ampC69 | ampC70 | ampC71 | ampC72 | ampC73 | ampC74 | ampC75 | ampC76 | ampC77 | ampC78 | ampC79 | ampC80 | ampC81 | ampC82 | ampC83 | ampC84 | ampC85 | ampC86 | ampC87 | ampC88 | ampC89 | ampC90 | ampC91 | ampC92 | ampC93 | ampC94 | ampC95 | ampC96 | ampC97 | ampC98 | ampC99 | ampC100 | ampC101 | ampC102 | ampC103 | ampC104 | ampC105 | ampC106 | ampC107 | ampC108 | ampC109 | ampC110 | ampC111 | ampC112 | ampC113 | ampC114 | ampC115 | ampC116 | ampC117 | ampC118 | ampC119 | ampC120 | ampC121 | ampC122 | ampC123 | ampC124 | ampC125 | ampC126 | ampC127 | ampC128 | ampC129 | ampC130 | ampC131 | ampC132 | ampC133 | ampC134 | ampC135 | ampC136 | ampC137 | ampC138 | ampC139 | ampC140 | ampC141 | ampC142 | ampC143 | ampC144 | ampC145 | ampC146 | ampC147 | ampC148 | ampC149 | ampC150 | ampC151 | ampC152 | ampC153 | ampC154 | ampC155 | ampC156 | ampC157 | ampC158 | ampC159 | ampC160 | ampC161 | ampC162 | ampC163 | ampC164 | ampC165 | ampC166 | ampC167 | ampC168 | ampC169 | ampC170 | ampC171 | ampC172 | ampC173 | ampC174 | ampC175 | ampC176 | ampC177 | ampC178 | ampC179 | ampC180 | ampC181 | ampC182 | ampC183 | ampC184 | ampC185 | ampC186 | ampC187 | ampC188 | ampC189 | ampC190 | ampC191 | ampC192 | ampC193 | ampC194 | ampC195 | ampC196 | ampC197 | ampC198 | ampC199 | ampC200 | ampC201 | ampC202 | ampC203 | ampC204 | ampC205 | ampC206 | ampC207 | ampC208 | ampC209 | ampC210 | ampC211 | ampC212 | ampC213 | ampC214 | ampC215 | ampC216 | ampC217 | ampC218 | ampC219 | ampC220 | ampC221 | ampC222 | ampC223 | ampC224 | ampC225 | ampC226 | ampC227 | ampC228 | ampC229 | ampC230 | ampC231 | ampC232 | ampC233 | ampC234 | ampC235 | ampC236 | ampC237 | ampC238 | ampC239 | ampC240 | ampC241 | ampC242 | ampC243 | ampC244 | ampC245 | ampC246 | ampC247 | ampC248 | ampC249 | ampC250 | ampC251 | ampC252 | ampC253 | ampC254 | ampC255 | ampC256 | ampC257 | ampC258 | ampC259 | ampC260 | ampC261 | ampC262 | ampC263 | ampC264 | ampC265 | ampC266 | ampC267 | ampC268 | ampC269 | ampC270 | ampC271 | ampC272 | ampC273 | ampC274 | ampC275 | ampC276 | ampC277 | ampC278 | ampC279 | ampC280 | ampC281 | ampC282 | ampC283 | ampC284 | ampC285 | ampC286 | ampC287 | ampC288 | ampC289 | ampC290 | ampC291 | ampC292 | ampC293 | ampC294 | ampC295 | ampC296 | ampC297 | ampC298 | ampC299 | ampC300 | ampC301 | ampC302 | ampC303 | ampC304 | ampC305 | ampC306 | ampC307 | ampC308 | ampC309 | ampC310 | ampC311 | ampC312 | ampC313 | ampC314 | ampC315 | ampC316 | ampC317 | ampC318 | ampC319 | ampC320 | ampC321 | ampC322 | ampC323 | ampC324 | ampC325 | ampC326 | ampC327 | ampC328 | ampC329 | ampC330 | ampC331 | ampC332 | ampC333 | ampC334 | ampC335 | ampC336 | ampC337 | ampC338 | ampC339 | ampC340 | ampC341 | ampC342 | ampC343 | ampC344 | ampC345 | ampC346 | ampC347 | ampC348 | ampC349 | ampC350 | ampC351 | ampC352 | ampC353 | ampC354 | ampC355 | ampC356 | ampC357 | ampC358 | ampC359 | ampC360 | ampC361 | ampC362 | ampC363 | ampC364 | ampC365 | ampC366 | ampC367 | ampC368 | ampC369 | ampC370 | ampC371 | ampC372 | ampC373 | ampC374 | ampC375 | ampC376 | ampC377 | ampC378 | ampC379 | ampC380 | ampC381 | ampC382 | ampC383 | ampC384 | ampC385 | ampC386 | ampC387 | ampC388 | ampC389 | ampC390 | ampC391 | ampC392 | ampC393 | ampC394 | ampC395 | ampC396 | ampC397 | ampC398 | ampC399 | ampC400 | ampC401 | ampC402 | ampC403 | ampC404 | ampC405 | ampC406 | ampC407 | ampC408 | ampC409 | ampC410 | ampC411 | ampC412 | ampC413 | ampC414 | ampC415 | ampC416 | ampC417 | ampC418 | ampC419 | ampC420 | ampC421 | ampC422 | ampC423 | ampC424 | ampC425 | ampC426 | ampC427 | ampC428 | ampC429 | ampC430 | ampC431 | ampC432 | ampC433 | ampC434 | ampC435 | ampC436 | ampC437 | ampC438 | ampC439 | ampC440 | ampC441 | ampC442 | ampC443 | ampC444 | ampC445 | ampC446 | ampC447 | ampC448 | ampC449 | ampC450 | ampC451 | ampC452 | ampC453 | ampC454 | ampC455 | ampC456 | ampC457 | ampC458 | ampC459 | ampC460 | ampC461 | ampC462 | ampC463 | ampC464 | ampC465 | ampC466 | ampC467 | ampC468 | ampC469 | ampC470 | ampC471 | ampC472 | ampC473 | ampC474 | ampC475 | ampC476 | ampC477 | ampC478 | ampC479 | ampC480 | ampC481 | ampC482 | ampC483 | ampC484 | ampC485 | ampC486 | ampC487 | ampC488 | ampC489 | ampC490 | ampC491 | ampC492 | ampC493 | ampC494 | ampC495 | ampC496 | ampC497 | ampC498 | ampC499 | ampC500 | ampC501 | ampC502 | ampC503 | ampC504 | ampC505 | ampC506 | ampC507 | ampC508 | ampC509 | ampC510 | ampC511 | ampC512 | ampC513 | ampC514 | ampC515 | ampC516 | ampC517 | ampC518 | ampC519 | ampC520 | ampC521 | ampC522 | ampC523 | ampC524 | ampC525 | ampC526 | ampC527 | ampC528 | ampC529 | ampC530 | ampC531 | ampC532 | ampC533 | ampC534 | ampC535 | ampC536 | ampC537 | ampC538 | ampC539 | ampC540 | ampC541 | ampC542 | ampC543 | ampC544 | ampC545 | ampC546 | ampC547 | ampC548 | ampC549 | ampC550 | ampC551 | ampC552 | ampC553 | ampC554 | ampC555 | ampC556 | ampC557 | ampC558 | ampC559 | ampC560 | ampC561 | ampC562 | ampC563 | ampC564 | ampC565 | ampC566 | ampC567 | ampC568 | ampC569 | ampC570 | ampC571 | ampC572 | ampC573 | ampC574 | ampC575 | ampC576 | ampC577 | ampC578 | ampC579 | ampC580 | ampC581 | ampC582 | ampC583 | ampC584 | ampC585 | ampC586 | ampC587 | ampC588 | ampC589 | ampC590 | ampC591 | ampC592 | ampC593 | ampC594 | ampC595 | ampC596 | ampC597 | ampC598 | ampC599 | ampC600 | ampC601 | ampC602 | ampC603 | ampC604 | ampC605 | ampC606 | ampC607 | ampC608 | ampC609 | ampC610 | ampC611 | ampC612 | ampC613 | ampC614 | ampC615 | ampC616 | ampC617 | ampC618 | ampC619 | ampC620 | ampC621 | ampC622 | ampC623 | ampC624 | ampC625 | ampC626 | ampC627 | ampC628 | ampC629 | ampC630 | ampC631 | ampC632 | ampC633 | ampC634 | ampC635 | ampC636 | ampC637 | ampC638 | ampC639 | ampC640 | ampC641 | ampC642 | ampC643 | ampC644 | ampC645 | ampC646 | ampC647 | ampC648 | ampC649 | ampC650 | ampC651 | ampC652 | ampC653 | ampC654 | ampC655 | ampC656 | ampC657 | ampC658 | ampC659 | ampC660 | ampC661 | ampC662 | ampC663 | ampC664 | ampC665 | ampC666 | ampC667 | ampC668 | ampC669 | ampC670 | ampC671 | ampC672 | ampC673 | ampC674 | ampC675 | ampC676 | ampC677 | ampC678 | ampC679 | ampC680 | ampC681 | ampC682 | ampC683 | ampC684 | ampC685 | ampC686 | ampC687 | ampC688 | ampC689 | ampC690 | ampC691 | ampC692 | ampC693 | ampC694 | ampC695 | ampC696 | ampC697 | ampC698 | ampC699 | ampC700 | ampC701 | ampC702 | ampC703 | ampC704 | ampC705 | ampC706 | ampC707 | ampC708 | ampC709 | ampC710 | ampC711 | ampC712 | ampC713 | ampC714 | ampC715 | ampC716 | ampC717 | ampC718 | ampC719 | ampC720 | ampC721 | ampC722 | ampC723 | ampC724 | ampC725 | ampC726 | ampC727 | ampC728 | ampC729 | ampC730 | ampC731 | ampC732 | ampC733 | ampC734 | ampC735 | ampC736 | ampC737 | ampC738 | ampC739 | ampC740 | ampC741 | ampC742 | ampC743 | ampC744 | ampC745 | ampC746 | ampC747 | ampC748 | ampC749 | ampC750 | ampC751 | ampC752 | ampC753 | ampC754 | ampC755 | ampC756 | ampC757 | ampC758 | ampC759 | ampC760 | ampC761 | ampC762 | ampC763 | ampC764 | ampC765 | ampC766 | ampC767 | ampC768 | ampC769 | ampC770 | ampC771 | ampC772 | ampC773 | ampC774 | ampC775 | ampC776 | ampC777 | ampC778 | ampC779 | ampC780 | ampC781 | ampC782 | ampC783 | ampC784 | ampC785 | ampC786 | ampC787 | ampC788 | ampC789 | ampC790 | ampC791 | ampC792 | ampC793 | ampC794 | ampC795 | ampC796 | ampC797 | ampC798 | ampC799 | ampC800 | ampC801 | ampC802 | ampC803 | ampC804 | ampC805 | ampC806 | ampC807 | ampC808 | ampC809 | ampC810 | ampC811 | ampC812 | ampC813 | ampC814 | ampC815 | ampC816 | ampC817 | ampC818 | ampC819 | ampC820 | ampC821 | ampC822 | ampC823 | ampC824 | ampC825 | ampC826 | ampC827 | ampC828 | ampC829 | ampC830 | ampC831 | ampC832 | ampC833 | ampC834 | ampC835 | ampC836 | ampC837 | ampC838 | ampC839 | ampC840 | ampC841 | ampC842 | ampC843 | ampC844 | ampC845 | ampC846 | ampC847 | ampC848 | ampC849 | ampC850 | ampC851 | ampC852 | ampC853 | ampC854 | ampC855 | ampC856 | ampC857 | ampC858 | ampC859 | ampC860 | ampC861 | ampC862 | ampC863 | ampC864 | ampC865 | ampC866 | ampC867 | ampC868 | ampC869 | ampC870 | ampC871 | ampC872 | ampC873 | ampC874 | ampC875 | ampC876 | ampC877 | ampC878 | ampC879 | ampC880 | ampC881 | ampC882 | ampC883 | ampC884 | ampC885 | ampC886 | ampC887 | ampC888 | ampC889 | ampC890 | ampC891 | ampC892 | ampC893 | ampC894 | ampC895 | ampC896 | ampC897 | ampC898 | ampC899 | ampC900 | ampC901 | ampC902 | ampC903 | ampC904 | ampC905 | ampC906 | ampC907 | ampC908 | ampC909 | ampC910 | ampC911 | ampC912 | ampC913 | ampC914 | ampC915 | ampC916 | ampC917 | ampC918 | ampC919 | ampC920 | ampC921 | ampC922 | ampC923 | ampC924 | ampC925 | ampC926 | ampC927 | ampC928 | ampC929 | ampC930</ |
|---------|-----------|----|-----------------------|-----------------------------------|------|-------|-------|-------|-------|-------|-------|-------|-------|--------|--------|--------|--------|--------|--------|--------|--------|--------|--------|--------|--------|--------|--------|--------|--------|--------|--------|--------|--------|--------|--------|--------|--------|--------|--------|--------|--------|--------|--------|--------|--------|--------|--------|--------|--------|--------|--------|--------|--------|--------|--------|--------|--------|--------|--------|--------|--------|--------|--------|--------|--------|--------|--------|--------|--------|--------|--------|--------|--------|--------|--------|--------|--------|--------|--------|--------|--------|--------|--------|--------|--------|--------|--------|--------|--------|--------|--------|--------|--------|--------|--------|--------|--------|--------|--------|--------|--------|--------|--------|---------|---------|---------|---------|---------|---------|---------|---------|---------|---------|---------|---------|---------|---------|---------|---------|---------|---------|---------|---------|---------|---------|---------|---------|---------|---------|---------|---------|---------|---------|---------|---------|---------|---------|---------|---------|---------|---------|---------|---------|---------|---------|---------|---------|---------|---------|---------|---------|---------|---------|---------|---------|---------|---------|---------|---------|---------|---------|---------|---------|---------|---------|---------|---------|---------|---------|---------|---------|---------|---------|---------|---------|---------|---------|---------|---------|---------|---------|---------|---------|---------|---------|---------|---------|---------|---------|---------|---------|---------|---------|---------|---------|---------|---------|---------|---------|---------|---------|---------|---------|---------|---------|---------|---------|---------|---------|---------|---------|---------|---------|---------|---------|---------|---------|---------|---------|---------|---------|---------|---------|---------|---------|---------|---------|---------|---------|---------|---------|---------|---------|---------|---------|---------|---------|---------|---------|---------|---------|---------|---------|---------|---------|---------|---------|---------|---------|---------|---------|---------|---------|---------|---------|---------|---------|---------|---------|---------|---------|---------|---------|---------|---------|---------|---------|---------|---------|---------|---------|---------|---------|---------|---------|---------|---------|---------|---------|---------|---------|---------|---------|---------|---------|---------|---------|---------|---------|---------|---------|---------|---------|---------|---------|---------|---------|---------|---------|---------|---------|---------|---------|---------|---------|---------|---------|---------|---------|---------|---------|---------|---------|---------|---------|---------|---------|---------|---------|---------|---------|---------|---------|---------|---------|---------|---------|---------|---------|---------|---------|---------|---------|---------|---------|---------|---------|---------|---------|---------|---------|---------|---------|---------|---------|---------|---------|---------|---------|---------|---------|---------|---------|---------|---------|---------|---------|---------|---------|---------|---------|---------|---------|---------|---------|---------|---------|---------|---------|---------|---------|---------|---------|---------|---------|---------|---------|---------|---------|---------|---------|---------|---------|---------|---------|---------|---------|---------|---------|---------|---------|---------|---------|---------|---------|---------|---------|---------|---------|---------|---------|---------|---------|---------|---------|---------|---------|---------|---------|---------|---------|---------|---------|---------|---------|---------|---------|---------|---------|---------|---------|---------|---------|---------|---------|---------|---------|---------|---------|---------|---------|---------|---------|---------|---------|---------|---------|---------|---------|---------|---------|---------|---------|---------|---------|---------|---------|---------|---------|---------|---------|---------|---------|---------|---------|---------|---------|---------|---------|---------|---------|---------|---------|---------|---------|---------|---------|---------|---------|---------|---------|---------|---------|---------|---------|---------|---------|---------|---------|---------|---------|---------|---------|---------|---------|---------|---------|---------|---------|---------|---------|---------|---------|---------|---------|---------|---------|---------|---------|---------|---------|---------|---------|---------|---------|---------|---------|---------|---------|---------|---------|---------|---------|---------|---------|---------|---------|---------|---------|---------|---------|---------|---------|---------|---------|---------|---------|---------|---------|---------|---------|---------|---------|---------|---------|---------|---------|---------|---------|---------|---------|---------|---------|---------|---------|---------|---------|---------|---------|---------|---------|---------|---------|---------|---------|---------|---------|---------|---------|---------|---------|---------|---------|---------|---------|---------|---------|---------|---------|---------|---------|---------|---------|---------|---------|---------|---------|---------|---------|---------|---------|---------|---------|---------|---------|---------|---------|---------|---------|---------|---------|---------|---------|---------|---------|---------|---------|---------|---------|---------|---------|---------|---------|---------|---------|---------|---------|---------|---------|---------|---------|---------|---------|---------|---------|---------|---------|---------|---------|---------|---------|---------|---------|---------|---------|---------|---------|---------|---------|---------|---------|---------|---------|---------|---------|---------|---------|---------|---------|---------|---------|---------|---------|---------|---------|---------|---------|---------|---------|---------|---------|---------|---------|---------|---------|---------|---------|---------|---------|---------|---------|---------|---------|---------|---------|---------|---------|---------|---------|---------|---------|---------|---------|---------|---------|---------|---------|---------|---------|---------|---------|---------|---------|---------|---------|---------|---------|---------|---------|---------|---------|---------|---------|---------|---------|---------|---------|---------|---------|---------|---------|---------|---------|---------|---------|---------|---------|---------|---------|---------|---------|---------|---------|---------|---------|---------|---------|---------|---------|---------|---------|---------|---------|---------|---------|---------|---------|---------|---------|---------|---------|---------|---------|---------|---------|---------|---------|---------|---------|---------|---------|---------|---------|---------|---------|---------|---------|---------|---------|---------|---------|---------|---------|---------|---------|---------|---------|---------|---------|---------|---------|---------|---------|---------|---------|---------|---------|---------|---------|---------|---------|---------|---------|---------|---------|---------|---------|---------|---------|---------|---------|---------|---------|---------|---------|---------|---------|---------|---------|---------|---------|---------|---------|---------|---------|---------|---------|---------|---------|---------|---------|---------|---------|---------|---------|---------|---------|---------|---------|---------|---------|---------|---------|---------|---------|---------|---------|---------|---------|---------|---------|---------|---------|---------|---------|---------|---------|---------|---------|---------|---------|---------|---------|---------|---------|---------|---------|---------|---------|---------|---------|---------|---------|---------|---------|---------|---------|---------|---------|---------|---------|---------|---------|---------|---------|---------|---------|---------|---------|---------|---------|---------|---------|---------|---------|---------|---------|---------|---------|---------|---------|---------|---------|---------|---------|---------|---------|---------|---------|---------|---------|---------|---------|---------|---------|---------|---------|---------|---------|---------|---------|---------|---------|---------|---------|---------|---------|---------|---------|---------|---------|---------|---------|---------|---------|---------|---------|---------|---------|---------|---------|---------|---------|---------|---------|---------|---------|---------|---------|---------|---------|---------|---------|---------|---------|---------|---------|---------|---------|---------|---------|---------|---------|-----------|
|---------|-----------|----|-----------------------|-----------------------------------|------|-------|-------|-------|-------|-------|-------|-------|-------|--------|--------|--------|--------|--------|--------|--------|--------|--------|--------|--------|--------|--------|--------|--------|--------|--------|--------|--------|--------|--------|--------|--------|--------|--------|--------|--------|--------|--------|--------|--------|--------|--------|--------|--------|--------|--------|--------|--------|--------|--------|--------|--------|--------|--------|--------|--------|--------|--------|--------|--------|--------|--------|--------|--------|--------|--------|--------|--------|--------|--------|--------|--------|--------|--------|--------|--------|--------|--------|--------|--------|--------|--------|--------|--------|--------|--------|--------|--------|--------|--------|--------|--------|--------|--------|--------|--------|--------|--------|--------|---------|---------|---------|---------|---------|---------|---------|---------|---------|---------|---------|---------|---------|---------|---------|---------|---------|---------|---------|---------|---------|---------|---------|---------|---------|---------|---------|---------|---------|---------|---------|---------|---------|---------|---------|---------|---------|---------|---------|---------|---------|---------|---------|---------|---------|---------|---------|---------|---------|---------|---------|---------|---------|---------|---------|---------|---------|---------|---------|---------|---------|---------|---------|---------|---------|---------|---------|---------|---------|---------|---------|---------|---------|---------|---------|---------|---------|---------|---------|---------|---------|---------|---------|---------|---------|---------|---------|---------|---------|---------|---------|---------|---------|---------|---------|---------|---------|---------|---------|---------|---------|---------|---------|---------|---------|---------|---------|---------|---------|---------|---------|---------|---------|---------|---------|---------|---------|---------|---------|---------|---------|---------|---------|---------|---------|---------|---------|---------|---------|---------|---------|---------|---------|---------|---------|---------|---------|---------|---------|---------|---------|---------|---------|---------|---------|---------|---------|---------|---------|---------|---------|---------|---------|---------|---------|---------|---------|---------|---------|---------|---------|---------|---------|---------|---------|---------|---------|---------|---------|---------|---------|---------|---------|---------|---------|---------|---------|---------|---------|---------|---------|---------|---------|---------|---------|---------|---------|---------|---------|---------|---------|---------|---------|---------|---------|---------|---------|---------|---------|---------|---------|---------|---------|---------|---------|---------|---------|---------|---------|---------|---------|---------|---------|---------|---------|---------|---------|---------|---------|---------|---------|---------|---------|---------|---------|---------|---------|---------|---------|---------|---------|---------|---------|---------|---------|---------|---------|---------|---------|---------|---------|---------|---------|---------|---------|---------|---------|---------|---------|---------|---------|---------|---------|---------|---------|---------|---------|---------|---------|---------|---------|---------|---------|---------|---------|---------|---------|---------|---------|---------|---------|---------|---------|---------|---------|---------|---------|---------|---------|---------|---------|---------|---------|---------|---------|---------|---------|---------|---------|---------|---------|---------|---------|---------|---------|---------|---------|---------|---------|---------|---------|---------|---------|---------|---------|---------|---------|---------|---------|---------|---------|---------|---------|---------|---------|---------|---------|---------|---------|---------|---------|---------|---------|---------|---------|---------|---------|---------|---------|---------|---------|---------|---------|---------|---------|---------|---------|---------|---------|---------|---------|---------|---------|---------|---------|---------|---------|---------|---------|---------|---------|---------|---------|---------|---------|---------|---------|---------|---------|---------|---------|---------|---------|---------|---------|---------|---------|---------|---------|---------|---------|---------|---------|---------|---------|---------|---------|---------|---------|---------|---------|---------|---------|---------|---------|---------|---------|---------|---------|---------|---------|---------|---------|---------|---------|---------|---------|---------|---------|---------|---------|---------|---------|---------|---------|---------|---------|---------|---------|---------|---------|---------|---------|---------|---------|---------|---------|---------|---------|---------|---------|---------|---------|---------|---------|---------|---------|---------|---------|---------|---------|---------|---------|---------|---------|---------|---------|---------|---------|---------|---------|---------|---------|---------|---------|---------|---------|---------|---------|---------|---------|---------|---------|---------|---------|---------|---------|---------|---------|---------|---------|---------|---------|---------|---------|---------|---------|---------|---------|---------|---------|---------|---------|---------|---------|---------|---------|---------|---------|---------|---------|---------|---------|---------|---------|---------|---------|---------|---------|---------|---------|---------|---------|---------|---------|---------|---------|---------|---------|---------|---------|---------|---------|---------|---------|---------|---------|---------|---------|---------|---------|---------|---------|---------|---------|---------|---------|---------|---------|---------|---------|---------|---------|---------|---------|---------|---------|---------|---------|---------|---------|---------|---------|---------|---------|---------|---------|---------|---------|---------|---------|---------|---------|---------|---------|---------|---------|---------|---------|---------|---------|---------|---------|---------|---------|---------|---------|---------|---------|---------|---------|---------|---------|---------|---------|---------|---------|---------|---------|---------|---------|---------|---------|---------|---------|---------|---------|---------|---------|---------|---------|---------|---------|---------|---------|---------|---------|---------|---------|---------|---------|---------|---------|---------|---------|---------|---------|---------|---------|---------|---------|---------|---------|---------|---------|---------|---------|---------|---------|---------|---------|---------|---------|---------|---------|---------|---------|---------|---------|---------|---------|---------|---------|---------|---------|---------|---------|---------|---------|---------|---------|---------|---------|---------|---------|---------|---------|---------|---------|---------|---------|---------|---------|---------|---------|---------|---------|---------|---------|---------|---------|---------|---------|---------|---------|---------|---------|---------|---------|---------|---------|---------|---------|---------|---------|---------|---------|---------|---------|---------|---------|---------|---------|---------|---------|---------|---------|---------|---------|---------|---------|---------|---------|---------|---------|---------|---------|---------|---------|---------|---------|---------|---------|---------|---------|---------|---------|---------|---------|---------|---------|---------|---------|---------|---------|---------|---------|---------|---------|---------|---------|---------|---------|---------|---------|---------|---------|---------|---------|---------|---------|---------|---------|---------|---------|---------|---------|---------|---------|---------|---------|---------|---------|---------|---------|---------|---------|---------|---------|---------|---------|---------|---------|---------|---------|---------|---------|---------|---------|---------|---------|---------|---------|---------|---------|---------|---------|---------|---------|---------|---------|---------|---------|---------|---------|---------|---------|---------|---------|---------|---------|---------|---------|---------|---------|---------|---------|---------|---------|---------|---------|---------|---------|---------|---------|---------|---------|---------|---------|---------|---------|---------|---------|---------|---------|---------|---------|---------|---------|---------|---------|---------|---------|---------|---------|---------|---------|---------|---------|---------|---------|---------|---------|---------|---------|---------|---------|---------|---------|---------|---------|---------|---------|---------|---------|---------|---------|---------|---------|---------|-----------|

**Table S6. Incompatibility groups replicons found in the scaffolds of MGH\_31 and MGH\_59**

| MGH_31       | MGH_59           |
|--------------|------------------|
| IncFIB(K);   | ColpVC           |
| IncFIB(pQil) | IncFIB(AP001918) |
| IncFII(K)    | IncFII(pRSB107)  |
| IncR         | IncN             |
|              | IncI1            |



Table S7. List of genes located in non-chromosomal scaffolds and having orthologs in MGH\_31 and MGH\_59

| #cluster id | isolate | Genbank locus name | functional annotation                                                     | location of gene | BLAST NR of unannotated clusters                                        | Number of orthologous genes among susceptible K. pneumoniae isolates |
|-------------|---------|--------------------|---------------------------------------------------------------------------|------------------|-------------------------------------------------------------------------|----------------------------------------------------------------------|
|             |         |                    |                                                                           |                  | (hit description, #accession, e-value)                                  |                                                                      |
| 737         | MGH_31  | L377_05470         | hypothetical protein                                                      | plasm            | phage protein, CAJ49067.1, 4e-07                                        | 23                                                                   |
| 737         | MGH_59  | AF45_05325         | hypothetical protein                                                      | plasm            |                                                                         |                                                                      |
| 936         | MGH_31  | L377_05449         | transposase insH for insertion sequence element IS5T                      | plasm            |                                                                         | 112                                                                  |
| 936         | MGH_31  | L377_05283         | transposase insH for insertion sequence element IS5I                      | plasm            |                                                                         |                                                                      |
| 936         | MGH_59  | AF45_05125         | transposase insH for insertion sequence element IS5Y                      | plasm            |                                                                         |                                                                      |
| 936         | MGH_59  | AF45_05321         | transposase insH for insertion sequence element IS5Y                      | undetermined     |                                                                         |                                                                      |
| 936         | MGH_59  | AF45_05255         | transposase insH for insertion sequence element IS5H                      | undetermined     |                                                                         |                                                                      |
| 1173        | MGH_31  | L377_05485         | hypothetical protein                                                      | plasm            | StbA, WP_012561140.1, 2e-49                                             | 14                                                                   |
| 1173        | MGH_59  | AF45_05333         | hypothetical protein                                                      | plasm            |                                                                         |                                                                      |
| 1243        | MGH_31  | L377_05482         | insertion element IS1 protein insB                                        | plasm            |                                                                         | 218                                                                  |
| 1243        | MGH_31  | L377_05202         | insertion element IS1 protein insB                                        | plasm            |                                                                         |                                                                      |
| 1243        | MGH_31  | L377_05205         | insertion element IS1 protein insB                                        | plasm            |                                                                         |                                                                      |
| 1243        | MGH_31  | L377_05282         | insertion element IS1 protein insB                                        | plasm            |                                                                         |                                                                      |
| 1243        | MGH_59  | AF45_05127         | insertion element IS1 protein insB                                        | plasm            |                                                                         |                                                                      |
| 1243        | MGH_59  | AF45_05399         | insertion element IS1 protein insB                                        | plasm            |                                                                         |                                                                      |
| 1243        | MGH_59  | AF45_05240         | insertion element IS1 5 protein insB                                      | undetermined     |                                                                         |                                                                      |
| 1243        | MGH_59  | AF45_05260         | insertion element IS1 3 protein insB                                      | undetermined     |                                                                         |                                                                      |
| 2267        | MGH_31  | L377_05191         | protein sopB                                                              | plasm            |                                                                         | 43                                                                   |
| 2267        | MGH_59  | AF45_05232         | protein sopB                                                              | undetermined     |                                                                         |                                                                      |
| 2911        | MGH_31  | L377_05513         | resolvase                                                                 | plasm            |                                                                         | 44                                                                   |
| 2911        | MGH_59  | AF45_05372         | resolvase                                                                 | plasm            |                                                                         |                                                                      |
| 2911        | MGH_59  | AF45_05235         | resolvase                                                                 | undetermined     |                                                                         | 54                                                                   |
| 2974        | MGH_31  | L377_05194         | integrase                                                                 | plasm            |                                                                         |                                                                      |
| 2974        | MGH_59  | AF45_05263         | hypothetical protein                                                      | undetermined     |                                                                         | 84                                                                   |
| 3206        | MGH_31  | L377_05478         | protein samB                                                              | plasm            |                                                                         |                                                                      |
| 3206        | MGH_31  | L377_05380         | protein samB                                                              | plasm            |                                                                         | 43                                                                   |
| 3206        | MGH_31  | L377_05390         | protein samB                                                              | plasm            |                                                                         |                                                                      |
| 3206        | MGH_31  | L377_05187         | protein samB                                                              | plasm            |                                                                         |                                                                      |
| 3206        | MGH_59  | AF45_05420         | protein impB                                                              | undetermined     |                                                                         |                                                                      |
| 3309        | MGH_31  | L377_05192         | protein sopA                                                              | plasm            |                                                                         | 20                                                                   |
| 3309        | MGH_59  | AF45_05233         | protein sopA                                                              | undetermined     |                                                                         |                                                                      |
| 3447        | MGH_31  | L377_05473         | hypothetical protein                                                      | plasm            | transposase, WP_033179069.1, 4e-36                                      | 50                                                                   |
| 3447        | MGH_59  | AF45_05328         | hypothetical protein                                                      | plasm            |                                                                         |                                                                      |
| 3458        | MGH_31  | L377_05361         | hypothetical protein                                                      | plasm            | plasmid stability protein StbA family protein, CNI36763.1, 1e-14        | 20                                                                   |
| 3458        | MGH_31  | L377_05294         | hypothetical protein                                                      | plasm            |                                                                         |                                                                      |
| 3458        | MGH_31  | L377_05305         | hypothetical protein                                                      | plasm            |                                                                         |                                                                      |
| 3458        | MGH_59  | AF45_05304         | hypothetical protein                                                      | undetermined     | putative toxin-antitoxin system, antitoxin component, ADP40712.1, 9e-39 | 89                                                                   |
| 4082        | MGH_31  | L377_05472         | hypothetical protein                                                      | plasm            |                                                                         |                                                                      |
| 4082        | MGH_59  | AF45_05327         | hypothetical protein                                                      | plasm            |                                                                         | 203                                                                  |
| 4402        | MGH_31  | L377_05481         | insertion element IS1 protein insA                                        | plasm            |                                                                         |                                                                      |
| 4402        | MGH_59  | AF45_05126         | insertion element IS1 1 protein insA                                      | plasm            |                                                                         | 112                                                                  |
| 4415        | MGH_31  | L377_05333         | conjugal transfer transcriptional regulator TraJ                          | plasm            |                                                                         |                                                                      |
| 4415        | MGH_59  | AF45_05331         | hypothetical protein                                                      | plasm            |                                                                         | 17                                                                   |
| 4415        | MGH_59  | AF45_05332         | hypothetical protein                                                      | plasm            |                                                                         |                                                                      |
| 4764        | MGH_31  | L377_05501         | transposase                                                               | plasm            |                                                                         | 21                                                                   |
| 4764        | MGH_31  | L377_05235         | transposase                                                               | plasm            |                                                                         |                                                                      |
| 4764        | MGH_31  | L377_05273         | transposase                                                               | plasm            |                                                                         |                                                                      |
| 4764        | MGH_59  | AF45_05162         | hypothetical protein                                                      | plasm            |                                                                         |                                                                      |
| 4764        | MGH_59  | AF45_05310         | hypothetical protein                                                      | undetermined     |                                                                         |                                                                      |
| 4764        | MGH_59  | AF45_05312         | hypothetical protein                                                      | undetermined     |                                                                         |                                                                      |
| 4764        | MGH_59  | AF45_05405         | hypothetical protein                                                      | plasm            |                                                                         |                                                                      |
| 4839        | MGH_31  | L377_05471         | hypothetical protein                                                      | plasm            |                                                                         |                                                                      |
| 4839        | MGH_59  | AF45_05326         | hypothetical protein                                                      | plasm            | Thermophilic glucose-6-phosphate isomerase, WP_031942309.1, 1e-60       |                                                                      |
| 4845        | MGH_31  | L377_05445         | transposon Tn3 resolvase                                                  | plasm            |                                                                         | 12                                                                   |
| 4845        | MGH_31  | L377_05232         | transposon Tn3 resolvase                                                  | plasm            |                                                                         |                                                                      |
| 4845        | MGH_31  | L377_05276         | transposon Tn3 resolvase                                                  | plasm            |                                                                         |                                                                      |
| 4845        | MGH_59  | AF45_05417         | transposon Tn3 resolvase                                                  | undetermined     |                                                                         | 7                                                                    |
| 4845        | MGH_59  | AF45_05152         | transposon Tn3 resolvase                                                  | plasm            |                                                                         |                                                                      |
| 4867        | MGH_31  | L377_05484         | hypothetical protein                                                      | plasm            | StdB, WP_012561139.1, 3e-169                                            | 31                                                                   |
| 4867        | MGH_59  | AF45_05334         | hypothetical protein                                                      | plasm            |                                                                         |                                                                      |
| 4936        | MGH_31  | L377_05446         | beta-lactamase TEM-12                                                     | plasm            |                                                                         | 71                                                                   |
| 4936        | MGH_31  | L377_05447         | beta-lactamase TEM                                                        | plasm            |                                                                         |                                                                      |
| 4936        | MGH_59  | AF45_05418         | blaTEM-1B1, resistance to beta-lactam                                     | undetermined     |                                                                         |                                                                      |
| 4936        | MGH_59  | AF45_05151         | blaTEM-1A4, resistance to beta-lactam                                     | plasm            |                                                                         |                                                                      |
| 4936        | MGH_59  | AF45_05409         | blaTEM-1A4, resistance to beta-lactam                                     | plasm            |                                                                         |                                                                      |
| 4938        | MGH_31  | L377_05301         | transposase                                                               | plasm            |                                                                         | 30                                                                   |
| 4938        | MGH_59  | AF45_05166         | hypothetical protein                                                      | plasm            |                                                                         |                                                                      |
| 4996        | MGH_31  | L377_05307         | type-F conjugative transfer system pilin assembly thiol-disulfide isomera | plasm            |                                                                         | 67                                                                   |
| 4996        | MGH_59  | AF45_05129         | type-F conjugative transfer system pilin assembly thiol-disulfide isomera | plasm            |                                                                         |                                                                      |
| 5057        | MGH_31  | L377_05407         | inner membrane protein                                                    | plasm            |                                                                         | 75                                                                   |
| 5057        | MGH_31  | L377_05418         | inner membrane protein                                                    | plasm            |                                                                         |                                                                      |
| 5057        | MGH_31  | L377_05432         | protein tral                                                              | plasm            |                                                                         |                                                                      |
| 5057        | MGH_31  | L377_05436         | conjugative transfer relaxase TraI                                        | plasm            |                                                                         |                                                                      |
| 5057        | MGH_59  | AF45_05138         | protein tral                                                              | plasm            |                                                                         |                                                                      |
| 5061        | MGH_31  | L377_05313         | type-F conjugative transfer system mating-pair stabilization protein TraN | plasm            |                                                                         | 7                                                                    |
| 5061        | MGH_59  | AF45_05122         | type-F conjugative transfer system mating-pair stabilization protein TraN | plasm            |                                                                         |                                                                      |
| 5068        | MGH_31  | L377_05360         | transposase                                                               | plasm            |                                                                         | 3                                                                    |
| 5068        | MGH_31  | L377_05293         | transposase                                                               | plasm            |                                                                         |                                                                      |
| 5068        | MGH_31  | L377_05304         | transposase                                                               | plasm            |                                                                         |                                                                      |
| 5068        | MGH_59  | AF45_05169         | hypothetical protein                                                      | plasm            |                                                                         | 7                                                                    |
| 5092        | MGH_31  | L377_05427         | conjugal transfer mating pair stabilization protein TraG                  | plasm            |                                                                         |                                                                      |
| 5092        | MGH_31  | L377_05431         | type IV conjugative transfer system coupling protein TraD                 | plasm            |                                                                         | 7                                                                    |
| 5092        | MGH_31  | L377_05435         | type IV conjugative transfer system coupling protein TraD                 | plasm            |                                                                         |                                                                      |

|             |         |                    |                                                                |                  | BLAST NR of unannotated clusters                             |                                                                      |
|-------------|---------|--------------------|----------------------------------------------------------------|------------------|--------------------------------------------------------------|----------------------------------------------------------------------|
| #cluster id | isolate | Genbank locus name | functional annotation                                          | location of gene | (hit description, #accession, e-value)                       | Number of orthologous genes among susceptible K. pneumoniae isolates |
| 5092        | MGH_59  | AF45_05137         | protein traD                                                   | plasm            |                                                              |                                                                      |
| 5160        | MGH_31  | L377_05179         | hypothetical protein                                           | plasm            | only hits against genes encoding hypothetical proteins       | 41                                                                   |
| 5160        | MGH_59  | AF45_05416         | hypothetical protein                                           | plasm            |                                                              |                                                                      |
| 5170        | MGH_31  | L377_05319         | protein traC                                                   | plasm            |                                                              | 35                                                                   |
| 5170        | MGH_59  | AF45_05117         | protein traC                                                   | plasm            |                                                              |                                                                      |
| 5195        | MGH_31  | L377_05521         | protein traB                                                   | plasm            |                                                              |                                                                      |
| 5195        | MGH_31  | L377_05328         | protein traB                                                   | plasm            |                                                              | 32                                                                   |
| 5195        | MGH_59  | AF45_05114         | protein traB                                                   | plasm            |                                                              |                                                                      |
| 5207        | MGH_31  | L377_05178         | hypothetical protein                                           | plasm            | hydrolase, WP_009310030.1, 0.0                               | 26                                                                   |
| 5207        | MGH_59  | AF45_05415         | hypothetical protein                                           | plasm            |                                                              |                                                                      |
| 5235        | MGH_31  | L377_05309         | type-F conjugative transfer system pilin assembly protein TraF | plasm            |                                                              | 30                                                                   |
| 5235        | MGH_59  | AF45_05124         | type-F conjugative transfer system pilin assembly protein TraF | plasm            |                                                              |                                                                      |
| 5254        | MGH_31  | L377_05451         | hypothetical protein                                           | plasm            |                                                              | 11                                                                   |
| 5254        | MGH_59  | AF45_05173         | replication initiation protein                                 | plasm            |                                                              |                                                                      |
| 5295        | MGH_31  | L377_05314         | type-F conjugative transfer system pilin assembly protein TrbC | plasm            |                                                              | 29                                                                   |
| 5295        | MGH_59  | AF45_05121         | type-F conjugative transfer system pilin assembly protein TrbC | plasm            |                                                              |                                                                      |
| 5421        | MGH_31  | L377_05315         | conjugal transfer pilus assembly protein TraU                  | plasm            |                                                              | 31                                                                   |
| 5421        | MGH_59  | AF45_05120         | hypothetical protein                                           | plasm            |                                                              |                                                                      |
| 5437        | MGH_31  | L377_05429         | TraT complement resistance protein                             | plasm            |                                                              |                                                                      |
| 5437        | MGH_31  | L377_05433         | TraT complement resistance protein                             | plasm            |                                                              | 31                                                                   |
| 5437        | MGH_59  | AF45_05135         | TraT complement resistance protein                             | plasm            |                                                              |                                                                      |
| 5444        | MGH_31  | L377_05426         | conjugative transfer pilus assembly protein TraH               | plasm            |                                                              | 32                                                                   |
| 5444        | MGH_59  | AF45_05132         | hypothetical protein                                           | plasm            |                                                              |                                                                      |
| 5465        | MGH_31  | L377_05298         | mph(A)1, resistance to macrolide                               | plasm            |                                                              | 3                                                                    |
| 5465        | MGH_59  | AF45_05163         | mph(A)1, resistance to macrolide                               | plasm            |                                                              |                                                                      |
| 5467        | MGH_31  | L377_05303         | hypothetical protein                                           | plasm            | chromate transporter, CHR family, partial, ESD86461.1, 0.0   | 3                                                                    |
| 5467        | MGH_59  | AF45_05168         | hypothetical protein                                           | plasm            |                                                              |                                                                      |
| 5471        | MGH_31  | L377_05302         | hypothetical protein                                           | plasm            | PadR family transcriptional regulator, WP_038612200.1, 5e-40 | 3                                                                    |
| 5471        | MGH_59  | AF45_05167         | hypothetical protein                                           | plasm            |                                                              |                                                                      |
| 5476        | MGH_31  | L377_05299         | hypothetical protein                                           | plasm            |                                                              | 3                                                                    |
| 5476        | MGH_59  | AF45_05164         | hypothetical protein                                           | plasm            | Mrx, AHA87067.1, e-145                                       |                                                                      |

Table S8. List of genes located in non-chromosomal scaffolds of BIDMC\_35 isolate

| Genbank locus name | functional annotation                               | PFAM/TIGRFAM domains                                                                                                     |
|--------------------|-----------------------------------------------------|--------------------------------------------------------------------------------------------------------------------------|
| L472_05108         | hypothetical protein                                |                                                                                                                          |
| L472_05109         | hypothetical protein                                |                                                                                                                          |
| L472_05110         | hypothetical protein                                |                                                                                                                          |
| L472_05111         | hypothetical protein                                |                                                                                                                          |
| L472_05112         | hypothetical protein                                |                                                                                                                          |
| L472_05114         | hypothetical protein                                |                                                                                                                          |
| L472_05113         | hypothetical protein                                |                                                                                                                          |
| L472_05115         | hypothetical protein                                |                                                                                                                          |
| L472_05116         | hypothetical protein                                |                                                                                                                          |
| L472_05117         | hypothetical protein                                |                                                                                                                          |
| L472_05118         | hypothetical protein                                |                                                                                                                          |
| L472_05119         | hypothetical protein                                |                                                                                                                          |
| L472_05120         | hypothetical protein                                |                                                                                                                          |
| L472_05121         | hypothetical protein                                | Methyltransferase domain                                                                                                 |
| L472_05122         | hypothetical protein                                | HD domain                                                                                                                |
| L472_05124         | hypothetical protein                                |                                                                                                                          |
| L472_05123         | hypothetical protein                                |                                                                                                                          |
| L472_05125         | hypothetical protein                                |                                                                                                                          |
| L472_05126         | hypothetical protein                                |                                                                                                                          |
| L472_05127         | hypothetical protein                                |                                                                                                                          |
| L472_05128         | hypothetical protein                                | Gram-negative bacterial TonB protein C-terminal                                                                          |
| L472_05129         | hypothetical protein                                |                                                                                                                          |
| L472_05130         | hypothetical protein                                | Phage regulatory protein Rha (Phage_pRha)                                                                                |
| L472_05132         | hypothetical protein                                | Protein of unknown function (DUF3927)                                                                                    |
| L472_05131         | hypothetical protein                                | Protein of unknown function (DUF3927)                                                                                    |
| L472_05133         | hypothetical protein                                |                                                                                                                          |
| L472_05134         | hypothetical protein                                | RNase H                                                                                                                  |
| L472_05135         | hypothetical protein                                |                                                                                                                          |
| L472_05136         | phage N-6-adenine-methyltransferase                 | DNA N-6-adenine-methyltransferase (Dam)                                                                                  |
| L472_05138         | hypothetical protein                                |                                                                                                                          |
| L472_05137         | hypothetical protein                                |                                                                                                                          |
| L472_05139         | hypothetical protein                                | Exonuclease, RNase_H superfamily, DNA polymerase family B, exonuclease domain                                            |
| L472_05140         | hypothetical protein                                | DNA polymerase family B, exonuclease domain                                                                              |
| L472_05141         | hypothetical protein                                | AAA domain                                                                                                               |
| L472_05142         | hypothetical protein                                | AAA domain, Dihydrofolate reductase                                                                                      |
| L472_05143         | hypothetical protein                                | Dihydrofolate reductase                                                                                                  |
| L472_05144         | hypothetical protein                                | Thymidylate synthase                                                                                                     |
| L472_05145         | hypothetical protein                                |                                                                                                                          |
| L472_05146         | hypothetical protein                                |                                                                                                                          |
| L472_05147         | RNA one modulator-like protein                      | Rop protein                                                                                                              |
| L472_05019         | hypothetical protein                                | Phosphoribosyl-ATP pyrophosphohydrolase                                                                                  |
| L472_05020         | ribonucleoside-diphosphate reductase 1 subunit beta | Ribonucleotide reductase, small chain                                                                                    |
| L472_05021         | ribonucleoside-diphosphate reductase, alpha subunit | Ribonucleotide reductase, barrel domain, Ribonucleotide reductase, all-alpha domain, ATP cone domain                     |
| L472_05022         | hypothetical protein                                |                                                                                                                          |
| L472_05025         | hypothetical protein                                | Calcineurin-like phosphoesterase superfamily domain, Calcineurin-like phosphoesterase                                    |
| L472_05023         | hypothetical protein                                |                                                                                                                          |
| L472_05024         | hypothetical protein                                | RecF/RecN/SMC N terminal domain, AAA domain                                                                              |
| L472_05026         | hypothetical protein                                |                                                                                                                          |
| L472_05028         | hypothetical protein                                | Initiator Replication protein                                                                                            |
| L472_05029         | hypothetical protein                                |                                                                                                                          |
| L472_05030         | hypothetical protein                                |                                                                                                                          |
| L472_05031         | hypothetical protein                                |                                                                                                                          |
| L472_05032         | hypothetical protein                                |                                                                                                                          |
| L472_05027         | hypothetical protein                                |                                                                                                                          |
| L472_05034         | hypothetical protein                                |                                                                                                                          |
| L472_05033         | hypothetical protein                                |                                                                                                                          |
| L472_05036         | hypothetical protein                                |                                                                                                                          |
| L472_05035         | hypothetical protein                                | SPFH domain / Band 7 family                                                                                              |
| L472_05037         | hypothetical protein                                |                                                                                                                          |
| L472_05038         | protein RecA                                        | recA bacterial DNA recombination protein                                                                                 |
| L472_05040         | hypothetical protein                                | 5'-3' exonuclease, N-terminal resolvase-like domain, 5'-3' exonuclease, C-terminal SAM fold                              |
| L472_05039         | hypothetical protein                                |                                                                                                                          |
| L472_05041         | hypothetical protein                                |                                                                                                                          |
| L472_05042         | hypothetical protein                                |                                                                                                                          |
| L472_05043         | hypothetical protein                                |                                                                                                                          |
| L472_05044         | hypothetical protein                                |                                                                                                                          |
| L472_05045         | hypothetical protein                                | Helix-hairpin-helix motif, Uracil DNA glycosylase superfamily                                                            |
| L472_05046         | hypothetical protein                                | PHP domain, Bacterial DNA polymerase III alpha subunit                                                                   |
| L472_05047         | hypothetical protein                                | AAA domain (dynein-related subfamily)                                                                                    |
| L472_05048         | hypothetical protein                                | Cobalamin biosynthesis protein CobT, Cobalamin biosynthesis protein CobT VWA domain, von Willebrand factor type A domain |
| L472_05049         | hypothetical protein                                |                                                                                                                          |
| L472_05051         | hypothetical protein                                |                                                                                                                          |
| L472_05052         | hypothetical protein                                |                                                                                                                          |
| L472_05050         | hypothetical protein                                | Phage integrase family                                                                                                   |
| L472_05053         | GrxA family glutaredoxin                            | Glutaredoxin-like domain (DUF836), Glutaredoxin                                                                          |
| L472_05054         | hypothetical protein                                |                                                                                                                          |
| L472_05055         | hypothetical protein                                |                                                                                                                          |
| L472_05056         | hypothetical protein                                | Protein of unknown function (DUF2829)                                                                                    |
| L472_05057         | protein phoH                                        | PhoH-like protein, Zonular occludens toxin (Zot)                                                                         |
| L472_05058         | hypothetical protein                                |                                                                                                                          |
| L472_05060         | hypothetical protein                                |                                                                                                                          |
| L472_05061         | hypothetical protein                                |                                                                                                                          |
| L472_05062         | hypothetical protein                                |                                                                                                                          |
| L472_05065         | hypothetical protein                                |                                                                                                                          |
| L472_05064         | hypothetical protein                                |                                                                                                                          |
| L472_05063         | hypothetical protein                                | ATP dependent DNA ligase domain, DNA ligase OB-like domain                                                               |
| L472_05066         | hypothetical protein                                |                                                                                                                          |
| L472_05067         | hypothetical protein                                |                                                                                                                          |
| L472_05068         | hypothetical protein                                | DnaB-like helicase C terminal domain, AAA domain                                                                         |
| L472_05069         | hypothetical protein                                |                                                                                                                          |
| L472_05070         | hypothetical protein                                |                                                                                                                          |
| L472_05071         | hypothetical protein                                |                                                                                                                          |
| L472_05072         | hypothetical protein                                | ATPase MipZ, VirC1 protein, CobQ/CobB/MinD/ParA nucleotide binding domain                                                |
| L472_05075         | hypothetical protein                                |                                                                                                                          |
| L472_05074         | hypothetical protein                                |                                                                                                                          |
| L472_05073         | hypothetical protein                                |                                                                                                                          |
| L472_05076         | hypothetical protein                                |                                                                                                                          |
| L472_05077         | hypothetical protein                                | Chaperone of endosialidase                                                                                               |
| L472_05078         | hypothetical protein                                | Domain of unknown function (DUF1983), Fibronectin type III domain, Putative phage tail protein                           |
| L472_05080         | hypothetical protein                                | Prokaryotic homologs of the JAB domain, Phage minor tail protein L, NipC/P60 family                                      |

| Genbank locus name | functional annotation                             | PFAM/TIGRFAM domains                                                                                                       |
|--------------------|---------------------------------------------------|----------------------------------------------------------------------------------------------------------------------------|
| L472_05081         | phage minor tail protein L                        | Phage minor tail protein L                                                                                                 |
| L472_05082         | hypothetical protein                              | Phage minor tail protein                                                                                                   |
| L472_05083         | hypothetical protein                              | Lambda phage tail tape-measure protein (Tape_meas_lam_C)                                                                   |
| L472_05079         | hypothetical protein                              |                                                                                                                            |
| L472_05084         | hypothetical protein                              |                                                                                                                            |
| L472_05085         | hypothetical protein                              |                                                                                                                            |
| L472_05086         | hypothetical protein                              |                                                                                                                            |
| L472_05088         | hypothetical protein                              |                                                                                                                            |
| L472_05087         | hypothetical protein                              |                                                                                                                            |
| L472_05089         | hypothetical protein                              |                                                                                                                            |
| L472_05091         | hypothetical protein                              |                                                                                                                            |
| L472_05090         | hypothetical protein                              |                                                                                                                            |
| L472_05092         | hypothetical protein                              | Bacterial Ig-like domain (group 2)                                                                                         |
| L472_05093         | hypothetical protein                              |                                                                                                                            |
| L472_05094         | hypothetical protein                              |                                                                                                                            |
| L472_05095         | hypothetical protein                              |                                                                                                                            |
| L472_05096         | hypothetical protein                              | Phage terminase large subunit, Terminase-like family                                                                       |
| L472_05097         | hypothetical protein                              |                                                                                                                            |
| L472_05098         | hypothetical protein                              |                                                                                                                            |
| L472_05101         | hypothetical protein                              | ABC transporter                                                                                                            |
| L472_05099         | hypothetical protein                              |                                                                                                                            |
| L472_05100         | hypothetical protein                              |                                                                                                                            |
| L472_05103         | hypothetical protein                              | ParB-like nuclease domain                                                                                                  |
| L472_05102         | hypothetical protein                              | ParB-like nuclease domain                                                                                                  |
| L472_05104         | hypothetical protein                              | Type III restriction enzyme, res subunit, Helicase conserved C-terminal domain, DEAD/DEAH box helicase                     |
| L472_05105         | hypothetical protein                              |                                                                                                                            |
| L472_05106         | hypothetical protein                              | Repressor of phase-1 flagellin                                                                                             |
| L472_05107         | hypothetical protein                              |                                                                                                                            |
| L472_04901         | hypothetical protein                              | Bacterial regulatory helix-turn-helix protein, lysR family                                                                 |
| L472_04902         | floR2, resistance to phenicol                     | Major Facilitator Superfamily, Sugar (and other) transporter                                                               |
| L472_04903         | hypothetical protein                              | Protein of unknown function (DUF3363)                                                                                      |
| L472_04904         | transposase                                       | Integrase core domain, DDE domain, Transposase IS66 family                                                                 |
| L472_04905         | S-formylglutathione hydrolase                     | Putative esterase                                                                                                          |
| L472_04906         | S-(hydroxymethyl)glutathione dehydrogenase        | Alcohol dehydrogenase GroES-like domain, Zinc-binding dehydrogenase                                                        |
| L472_04907         | tet(D)1, resistance to tetracycline               | Major Facilitator Superfamily, Sugar (and other) transporter                                                               |
| L472_04908         | tetracycline repressor protein class D            | Tetracyclin repressor, C-terminal all-alpha domain, Bacterial regulatory proteins, tetR family                             |
| L472_04909         | transposase                                       | Transposase IS66 family, DDE domain, Integrase core domain                                                                 |
| L472_04910         | Na <sup>+</sup> /H <sup>+</sup> antiporter nhaA 2 | Na <sup>+</sup> /H <sup>+</sup> antiporter 1                                                                               |
| L472_04911         | hypothetical protein                              |                                                                                                                            |
| L472_04912         | hypothetical protein                              | Cupin domain, Mannose-6-phosphate isomerase                                                                                |
| L472_04913         | hypothetical protein                              | Protein of unknown function DUF86, Nucleotidyltransferase domain                                                           |
| L472_04914         | hypothetical protein                              | Nucleotidyltransferase domain                                                                                              |
| L472_04915         | transposase for transposon Tn21                   | Tn3 transposase DDE domain, Domain of unknown function (DUF4158)                                                           |
| L472_04916         | transposase                                       | Transposase, Transposase IS116/IS110/IS902 family                                                                          |
| L472_04917         | hypothetical protein                              | Predicted membrane protein (DUF2254)                                                                                       |
| L472_04918         | hypothetical protein                              |                                                                                                                            |
| L472_04919         | high-affinity choline transporter                 | BCCT family transporter                                                                                                    |
| L472_04921         | hypothetical protein                              |                                                                                                                            |
| L472_04920         | insertion element IS1 protein insB                | IS1 transposase                                                                                                            |
| L472_04922         | hypothetical protein                              |                                                                                                                            |
| L472_04923         | hypothetical protein                              |                                                                                                                            |
| L472_04924         | transposase                                       | Transposase DDE domain                                                                                                     |
| L472_04925         | hypothetical protein                              | UvrD-like helicase C-terminal domain, Part of AAA domain, PIF1-like helicase                                               |
| L472_04926         | hypothetical protein                              |                                                                                                                            |
| L472_04927         | transposase                                       | Transposase DDE domain                                                                                                     |
| L472_04928         | DNA polymerase V                                  | Peptidase S24-like                                                                                                         |
| L472_04929         | protein samB                                      | Domain of unknown function (DUF4113), IMS family HHH motif, impB/mucB/samB family, impB/mucB/samB family C-terminal domain |
| L472_04931         | plasmid partition protein ParA                    | CobQ/CobB/Mind/ParA nucleotide binding domain                                                                              |
| L472_04930         | ParB family chromosome partitioning protein       | ParB-like nuclease domain, ParB family                                                                                     |
| L472_04932         | hypothetical protein                              |                                                                                                                            |
| L472_04933         | hypothetical protein                              |                                                                                                                            |
| L472_04934         | DNA replication protein RepB                      | Initiator Replication protein                                                                                              |
| L472_04935         | hypothetical protein                              |                                                                                                                            |
| L472_04936         | hypothetical protein                              |                                                                                                                            |
| L472_04937         | resolvase                                         | Phage integrase family                                                                                                     |
| L472_04938         | hypothetical protein                              |                                                                                                                            |
| L472_04939         | hypothetical protein                              |                                                                                                                            |
| L472_04940         | virulence-associated protein vagC                 | Antidote-toxin recognition MazE                                                                                            |
| L472_04941         | plasmid maintenance protein VagD                  | PIN domain                                                                                                                 |
| L472_04942         | hypothetical protein                              | AAA ATPase domain, P-loop containing region of AAA domain                                                                  |
| L472_04943         | transposase                                       | Transposase IS66 family, Integrase core domain, DDE domain                                                                 |
| L472_04944         | hypothetical protein                              | Electron transfer DM13                                                                                                     |
| L472_04945         | hypothetical protein                              | Protein of unknown function (DUF1471)                                                                                      |
| L472_04946         | hypothetical protein                              | Bacterial regulatory proteins, tetR family                                                                                 |
| L472_04947         | hypothetical protein                              | EamA-like transporter family                                                                                               |
| L472_04948         | hypothetical protein                              | Alpha/beta hydrolase family, Prolyl oligopeptidase family                                                                  |
| L472_04949         | transposase                                       | Transposase IS116/IS110/IS902 family, Transposase                                                                          |
| L472_04950         | hypothetical protein                              |                                                                                                                            |
| L472_04951         | hypothetical protein                              |                                                                                                                            |
| L472_04952         | hypothetical protein                              | RHS Repeat, RHS protein                                                                                                    |
| L472_04953         | hypothetical protein                              |                                                                                                                            |
| L472_04954         | hypothetical protein                              |                                                                                                                            |
| L472_04955         | hypothetical protein                              |                                                                                                                            |
| L472_04956         | hypothetical protein                              |                                                                                                                            |
| L472_04957         | hypothetical protein                              |                                                                                                                            |
| L472_04958         | hypothetical protein                              | Phage integrase family, Phage integrase, N-terminal SAM-like domain                                                        |
| L472_04959         | hypothetical protein                              | Exonuclease                                                                                                                |
| L472_04960         | hypothetical protein                              |                                                                                                                            |
| L472_04961         | DNA replicatio site-binding protein               | DNA replication terminus site-binding protein (Ter protein)                                                                |
| L472_04962         | hypothetical protein                              | Plasmid replication region DNA-binding N-term, Leucine-rich repeats of kinetochore protein Cenp-F/LEK1                     |
| L472_04963         | hypothetical protein                              |                                                                                                                            |
| L472_04964         | hypothetical protein                              | UvrD-like helicase C-terminal domain, Part of AAA domain, UvrD/REP helicase N-terminal domain                              |
| L472_04965         | hypothetical protein                              |                                                                                                                            |
| L472_04966         | hypothetical protein                              | Conjugative relaxosome accessory transposon protein                                                                        |
| L472_04967         | hypothetical protein                              | TraG-like protein, N-terminal region                                                                                       |
| L472_04968         | hypothetical protein                              | Transglycosylase SLT domain                                                                                                |
| L472_04969         | hypothetical protein                              |                                                                                                                            |
| L472_04970         | hypothetical protein                              | Flagellar transcriptional activator (FlhC)                                                                                 |
| L472_04971         | hypothetical protein                              | H-NS histone family                                                                                                        |
| L472_04972         | PTRC system protein D                             |                                                                                                                            |
| L472_04973         | hypothetical protein                              |                                                                                                                            |
| L472_04974         | hypothetical protein                              |                                                                                                                            |

| Genbank locus name | functional annotation                     | PFAM/TIGRFAM domains                                                                                                                                                                                    |
|--------------------|-------------------------------------------|---------------------------------------------------------------------------------------------------------------------------------------------------------------------------------------------------------|
| L472_04975         | hypothetical protein                      | Initiator Replication protein                                                                                                                                                                           |
| L472_04976         | hypothetical protein                      |                                                                                                                                                                                                         |
| L472_04977         | hypothetical protein                      | Phosphoadenosine phosphosulfate reductase family                                                                                                                                                        |
| L472_04978         | hypothetical protein                      |                                                                                                                                                                                                         |
| L472_04979         | hypothetical protein                      |                                                                                                                                                                                                         |
| L472_04980         | hypothetical protein                      |                                                                                                                                                                                                         |
| L472_04982         | hypothetical protein                      |                                                                                                                                                                                                         |
| L472_04981         | hypothetical protein                      |                                                                                                                                                                                                         |
| L472_04984         | signal peptide peptidase SppA, 36K type   | Serine dehydrogenase proteinase, Clp protease, Peptidase family 549                                                                                                                                     |
| L472_04983         | hypothetical protein                      |                                                                                                                                                                                                         |
| L472_04985         | hypothetical protein                      | DSBA-like thioredoxin domain, Thioredoxin-like domain, Thioredoxin                                                                                                                                      |
| L472_04986         | hypothetical protein                      |                                                                                                                                                                                                         |
| L472_04989         | hypothetical protein                      |                                                                                                                                                                                                         |
| L472_04988         | hypothetical protein                      |                                                                                                                                                                                                         |
| L472_04987         | hypothetical protein                      |                                                                                                                                                                                                         |
| L472_04990         | hypothetical protein                      |                                                                                                                                                                                                         |
| L472_04991         | hypothetical protein                      |                                                                                                                                                                                                         |
| L472_04992         | hypothetical protein                      |                                                                                                                                                                                                         |
| L472_04993         | hypothetical protein                      | Staphylococcal nuclease homologue                                                                                                                                                                       |
| L472_04994         | DNA-binding protein HU-beta               | Bacterial DNA-binding protein                                                                                                                                                                           |
| L472_04995         | hypothetical protein                      | Helix-turn-helix, Helix-turn-helix domain                                                                                                                                                               |
| L472_04996         | hypothetical protein                      | Phage derived protein Gp49-like (DUF891)                                                                                                                                                                |
| L472_04997         | hypothetical protein                      |                                                                                                                                                                                                         |
| L472_04998         | hypothetical protein                      |                                                                                                                                                                                                         |
| L472_04999         | hypothetical protein                      |                                                                                                                                                                                                         |
| L472_05000         | hypothetical protein                      |                                                                                                                                                                                                         |
| L472_05001         | hypothetical protein                      |                                                                                                                                                                                                         |
| L472_05002         | hypothetical protein                      | Protein of unknown function (DUF1643)                                                                                                                                                                   |
| L472_05003         | hypothetical protein                      |                                                                                                                                                                                                         |
| L472_05004         | hypothetical protein                      |                                                                                                                                                                                                         |
| L472_05005         | hypothetical protein                      | ATPase family associated with various cellular activities (AAA)                                                                                                                                         |
| L472_05006         | hypothetical protein                      |                                                                                                                                                                                                         |
| L472_05007         | hypothetical protein                      |                                                                                                                                                                                                         |
| L472_05009         | hypothetical protein                      |                                                                                                                                                                                                         |
| L472_05008         | hypothetical protein                      |                                                                                                                                                                                                         |
| L472_05012         | hypothetical protein                      |                                                                                                                                                                                                         |
| L472_05011         | hypothetical protein                      |                                                                                                                                                                                                         |
| L472_05010         | hypothetical protein                      |                                                                                                                                                                                                         |
| L472_05014         | hypothetical protein                      | VirB8 protein                                                                                                                                                                                           |
| L472_05013         | hypothetical protein                      | VirB8 protein                                                                                                                                                                                           |
| L472_05016         | hypothetical protein                      | Bacterial conjugation TrbI-like protein                                                                                                                                                                 |
| L472_05015         | P-type conjugative transfer protein VirB9 | Conjugal transfer protein                                                                                                                                                                               |
| L472_05017         | P-type DNA transfer ATPase VirB11         | Type II/IV secretion system protein                                                                                                                                                                     |
| L472_05018         | transposase                               | Transposase IS66 family, Integrase core domain, DDE domain                                                                                                                                              |
| L472_04842         | QnrB41, resistance to quinolone           | Pentapeptide repeats (9 copies), Pentapeptide repeats (8 copies)                                                                                                                                        |
| L472_04843         | psp operon transcriptional activator      | Bacterial regulatory protein, Fis family, AAA domain (dynein-related subfamily), Sigma-54 interaction domain                                                                                            |
| L472_04844         | phage shock protein A                     | PspA/IM30 family                                                                                                                                                                                        |
| L472_04845         | phage shock protein B                     | Phage shock protein B                                                                                                                                                                                   |
| L472_04846         | phage shock protein C                     | PspC domain                                                                                                                                                                                             |
| L472_04847         | phage shock protein D                     | Phage shock protein PspD (Phageshock_PspD)                                                                                                                                                              |
| L472_04848         | hypothetical protein                      |                                                                                                                                                                                                         |
| L472_04849         | transposase                               | Transposase IS66 family, Integrase core domain, DDE domain                                                                                                                                              |
| L472_04851         | hypothetical protein                      | PhoH-like protein, IstB-like ATP binding protein, ATPase family associated with various cellular activities (AAA), Bacterial dnaA protein                                                               |
| L472_04850         | hypothetical protein                      | Homeodomain-like domain, Integrase core domain                                                                                                                                                          |
| L472_04853         | blaOXA-10, resistance to beta-lactam      | Penicillin binding protein transpeptidase domain                                                                                                                                                        |
| L472_04852         | aadA12, resistance to aminoglycoside      | Domain of unknown function (DUF4111), Nucleotidyltransferase domain                                                                                                                                     |
| L472_04854         | integrase/recombinase                     | Phage integrase, N-terminal SAM-like domain, Phage integrase family                                                                                                                                     |
| L472_04855         | transposase                               | Integrase core domain, DDE domain, Transposase IS66 family                                                                                                                                              |
| L472_04856         | hypothetical protein                      | Tn3 transposase DDE domain, Domain of unknown function (DUF4158)                                                                                                                                        |
| L472_04857         | transposase                               | Transposase IS116/IS110/IS902 family, Transposase                                                                                                                                                       |
| L472_04858         | transposase for transposon                | Tn3 transposase DDE domain                                                                                                                                                                              |
| L472_04859         | transposase                               | Transposase, Transposase IS116/IS110/IS902 family                                                                                                                                                       |
| L472_04860         | hypothetical protein                      |                                                                                                                                                                                                         |
| L472_04861         | peptide-methionine (S)-S-oxide reductase  | Peptide methionine sulfoxide reductase                                                                                                                                                                  |
| L472_04862         | methionine-R-sulfoxide reductase          | SelR domain, Peptide methionine sulfoxide reductase                                                                                                                                                     |
| L472_04863         | hypothetical protein                      |                                                                                                                                                                                                         |
| L472_04864         | hypothetical protein                      | Protein of unknown function, DUF417                                                                                                                                                                     |
| L472_04865         | hypothetical protein                      | Protein of unknown function (DUF1471)                                                                                                                                                                   |
| L472_04866         | hypothetical protein                      | Bacterial regulatory proteins, tetR family                                                                                                                                                              |
| L472_04867         | hypothetical protein                      | Protein of unknown function (DUF1471)                                                                                                                                                                   |
| L472_04868         | transposase                               | Transposase IS116/IS110/IS902 family, Transposase                                                                                                                                                       |
| L472_04869         | transposase for transposon                | Tn3 transposase DDE domain                                                                                                                                                                              |
| L472_04870         | transposase                               | Integrase core domain, DDE domain, Transposase IS66 family                                                                                                                                              |
| L472_04871         | hypothetical protein                      | Transposase                                                                                                                                                                                             |
| L472_04872         | hypothetical protein                      | IS66 Orf2 like protein                                                                                                                                                                                  |
| L472_04875         | hypothetical protein                      |                                                                                                                                                                                                         |
| L472_04873         | hypothetical protein                      | Transposase C of IS166 homeodomain, Transposase IS66 family, zinc-finger binding domain of transposase IS66, IS66 C-terminal element                                                                    |
| L472_04874         | hypothetical protein                      |                                                                                                                                                                                                         |
| L472_04876         | hypothetical protein                      |                                                                                                                                                                                                         |
| L472_04877         | hypothetical protein                      | Domain of unknown function (DUF4400)                                                                                                                                                                    |
| L472_04878         | hypothetical protein                      | Domain of unknown function (DUF4400)                                                                                                                                                                    |
| L472_04879         | hypothetical protein                      | Type IV secretion-system coupling protein DNA-binding domain, Domain of unknown function DUF87, TraM recognition site of TraD and TraG, AAA-like domain, Bacterial protein of unknown function (DUF853) |
| L472_04880         | hypothetical protein                      | Putative helicase                                                                                                                                                                                       |
| L472_04881         | hypothetical protein                      |                                                                                                                                                                                                         |
| L472_04882         | hypothetical protein                      | DNA topoisomerase, Toprim domain, Topoisomerase DNA binding C4 zinc finger                                                                                                                              |
| L472_04883         | hypothetical protein                      |                                                                                                                                                                                                         |
| L472_04884         | hypothetical protein                      |                                                                                                                                                                                                         |
| L472_04886         | hypothetical protein                      | C-5 cytosine-specific DNA methylase                                                                                                                                                                     |
| L472_04885         | hypothetical protein                      |                                                                                                                                                                                                         |
| L472_04887         | hypothetical protein                      |                                                                                                                                                                                                         |
| L472_04888         | hypothetical protein                      |                                                                                                                                                                                                         |
| L472_04890         | hypothetical protein                      |                                                                                                                                                                                                         |
| L472_04891         | hypothetical protein                      |                                                                                                                                                                                                         |
| L472_04889         | hypothetical protein                      |                                                                                                                                                                                                         |
| L472_04892         | hypothetical protein                      |                                                                                                                                                                                                         |
| L472_04893         | hypothetical protein                      | N-6 DNA Methylase                                                                                                                                                                                       |
| L472_04894         | hypothetical protein                      | Winged helix-turn helix, M protein trans-acting positive regulator (MGA) HTH domain                                                                                                                     |
| L472_04895         | hypothetical protein                      | KorB domain, ParB-like nuclease domain                                                                                                                                                                  |
| L472_04896         | hypothetical protein                      | AAA domain, CobQ/CobB/MinD/ParA nucleotide binding domain, ATPase MipZ                                                                                                                                  |
| L472_04897         | hypothetical protein                      |                                                                                                                                                                                                         |
| L472_04898         | sul22, resistance to sulphonamide         | Pterin binding enzyme                                                                                                                                                                                   |

| Genbank locus name | functional annotation     | PFAM/TIGRFAM domains                                             |
|--------------------|---------------------------|------------------------------------------------------------------|
| L472_04899         | phosphoglucosamine mutase | Phosphoglucomutase/phosphomannomutase, alpha/beta/alpha domain I |
| L472_04900         | transposase               | Putative transposase, Transposase zinc-binding domain            |

Table S9. List of MGH\_31 and MGH\_59 genes associated antibiotic resistance and belonging to COGs shared by the two isolates.

| #cluster id | isolate | Genbank locus name | functional annotation                                               | location of gene | Has beta-lactamase PFAM domain                                        | PFAM domain e-value       |
|-------------|---------|--------------------|---------------------------------------------------------------------|------------------|-----------------------------------------------------------------------|---------------------------|
| 55          | MGH_31  | L377_05492         | aadA21, resistance to aminoglycoside                                | plasm            |                                                                       |                           |
| 55          | MGH_31  | L377_05494         | aadA13, resistance to aminoglycoside                                | plasm            |                                                                       |                           |
| 55          | MGH_31  | L377_01167         | aadA21, resistance to aminoglycoside                                | chrom            |                                                                       |                           |
| 55          | MGH_59  | AF45_05307         | aadA21, resistance to aminoglycoside                                | undetermined     |                                                                       |                           |
| 55          | MGH_59  | AF45_05411         | aadA15, resistance to aminoglycoside                                | plasm            |                                                                       |                           |
| 246         | MGH_31  | L377_02898         | ribonuclease Z                                                      | chrom            | Beta-lactamase superfamily domain, Metallo-beta-lactamase superfamily | 4.1e-28, 1.8e-11          |
| 246         | MGH_59  | AF45_02421         | ribonuclease Z                                                      | chrom            | Beta-lactamase superfamily domain, Metallo-beta-lactamase superfamily | 4.1e-28, 1.8e-11          |
| 388         | MGH_31  | L377_02805         | D-alanyl-D-alanine endopeptidase                                    | chrom            | Beta-lactamase enzyme family                                          | 3.20E-12                  |
| 388         | MGH_59  | AF45_02327         | D-alanyl-D-alanine endopeptidase                                    | chrom            | Beta-lactamase enzyme family                                          | 3.20E-12                  |
| 432         | MGH_31  | L377_02314         | penicillin-binding protein AmpH                                     | chrom            | Beta-lactamase                                                        | 0                         |
| 432         | MGH_59  | AF45_04918         | penicillin-binding protein AmpH                                     | chrom            | Beta-lactamase                                                        | 0                         |
| 544         | MGH_31  | L377_01986         | beta-lactamase                                                      | chrom            | Beta-lactamase superfamily domain                                     | 1.5e-35, 2.1e-22          |
| 544         | MGH_59  | AF45_00161         | hypothetical protein                                                | chrom            | Beta-lactamase superfamily domain                                     | 2.1e-22, 1.5e-35          |
| 604         | MGH_31  | L377_02852         | beta-lactamase                                                      | chrom            | Beta-lactamase                                                        | 7.10E-38                  |
| 604         | MGH_59  | AF45_02374         | hypothetical protein                                                | chrom            | Beta-lactamase                                                        | 7.10E-38                  |
| 642         | MGH_31  | L377_04342         | beta-lactamase                                                      | chrom            | Beta-lactamase superfamily domain, Metallo-beta-lactamase superfamily | 4.2e-12, 8.8e-18, 2.8e-05 |
| 642         | MGH_59  | AF45_03763         | hypothetical protein                                                | chrom            | Beta-lactamase superfamily domain, Metallo-beta-lactamase superfamily | 4.2e-12, 8.8e-18, 2.8e-05 |
| 711         | MGH_31  | L377_04742         | LamB, LamB                                                          | chrom            |                                                                       |                           |
| 711         | MGH_59  | AF45_04157         | LamB, LamB                                                          | chrom            |                                                                       |                           |
| 810         | MGH_31  | L377_04903         | L-ascorbate 6-phosphate lactonase                                   | chrom            | Beta-lactamase superfamily domain                                     | 1.3e-24, 1.7e-16          |
| 810         | MGH_59  | AF45_04323         | hypothetical protein                                                | chrom            | Beta-lactamase superfamily domain                                     | 1.3e-24, 1.7e-16          |
| 1054        | MGH_31  | L377_05076         | mdtm, Major facilitator superfamily transporter. Multidrug resista  | chrom            |                                                                       |                           |
| 1054        | MGH_59  | AF45_04497         | mdtm, Major facilitator superfamily transporter. Multidrug resista  | chrom            |                                                                       |                           |
| 1155        | MGH_31  | L377_02899         | D-alanyl-D-alanine carboxypeptidase dacD                            | chrom            | Beta-lactamase enzyme family                                          | 4.50E-12                  |
| 1155        | MGH_59  | AF45_02222         | D-alanyl-D-alanine carboxypeptidase dacD                            | chrom            | Beta-lactamase enzyme family                                          | 4.50E-12                  |
| 1179        | MGH_31  | L377_02594         | ksga, Specifically dimethylates two adjacent adenosines in the k    | chrom            |                                                                       |                           |
| 1179        | MGH_59  | AF45_04638         | ksga, Specifically dimethylates two adjacent adenosines in the k    | chrom            |                                                                       |                           |
| 1217        | MGH_31  | L377_01674         | multidrug transporter MdfA                                          | chrom            |                                                                       |                           |
| 1217        | MGH_59  | AF45_00477         | multidrug transporter MdfA                                          | chrom            |                                                                       |                           |
| 1345        | MGH_31  | L377_00441         | mdtk, Major facilitator superfamily transporter. Multidrug resista  | chrom            |                                                                       |                           |
| 1345        | MGH_59  | AF45_01719         | mdtk, Major facilitator superfamily transporter. Multidrug resista  | chrom            |                                                                       |                           |
| 1437        | MGH_31  | L377_01570         | competence protein ComEC                                            | chrom            | Metallo-beta-lactamase superfamily                                    | 4.20E-14                  |
| 1437        | MGH_59  | AF45_00590         | hypothetical protein                                                | chrom            | Metallo-beta-lactamase superfamily                                    | 4.20E-14                  |
| 1439        | MGH_31  | L377_02350         | PhoE, PhoE                                                          | chrom            |                                                                       |                           |
| 1439        | MGH_59  | AF45_04882         | PhoE, PhoE                                                          | chrom            |                                                                       |                           |
| 1468        | MGH_31  | L377_00433         | beta-lactamase                                                      | chrom            | Beta-lactamase superfamily domain, Metallo-beta-lactamase superfamily | 2e-10, 2.8e-05, 5.6e-23   |
| 1468        | MGH_59  | AF45_01727         | hypothetical protein                                                | chrom            | Beta-lactamase superfamily domain, Metallo-beta-lactamase superfamily | 2e-10, 2.8e-05, 5.6e-23   |
| 1641        | MGH_31  | L377_01729         | bcrA, ABC transporter system, bacitracin efflux pump.               | chrom            |                                                                       |                           |
| 1641        | MGH_59  | AF45_00422         | bcrA, ABC transporter system, bacitracin efflux pump.               | chrom            |                                                                       |                           |
| 1730        | MGH_31  | L377_05066         | fosA3_NZ, resistance to fosfomycin                                  | chrom            |                                                                       |                           |
| 1730        | MGH_59  | AF45_04487         | fosA3_NZ, resistance to fosfomycin                                  | chrom            |                                                                       |                           |
| 2049        | MGH_31  | L377_03744         | tolC, Resistance-nodulation-cell division transporter system. Mu    | chrom            |                                                                       |                           |
| 2049        | MGH_59  | AF45_03164         | tolC, Resistance-nodulation-cell division transporter system. Mu    | chrom            |                                                                       |                           |
| 2103        | MGH_31  | L377_01677         | D-alanyl-D-alanine carboxypeptidase dacC                            | chrom            | Beta-lactamase enzyme family                                          | 9.00E-14                  |
| 2103        | MGH_59  | AF45_00474         | D-alanyl-D-alanine carboxypeptidase dacC                            | chrom            | Beta-lactamase enzyme family                                          | 9.00E-14                  |
| 2292        | MGH_31  | L377_02187         | AcrB, acriflavine resistance protein B, multidrug resistance efflux | chrom            |                                                                       |                           |
| 2292        | MGH_59  | AF45_05047         | AcrB, acriflavine resistance protein B, multidrug resistance efflux | chrom            |                                                                       |                           |
| 2307        | MGH_31  | L377_01454         | mdtg, Major facilitator superfamily transporter. Multidrug resista  | chrom            |                                                                       |                           |
| 2307        | MGH_59  | AF45_00706         | mdtg, Major facilitator superfamily transporter. Multidrug resista  | chrom            |                                                                       |                           |
| 2345        | MGH_31  | L377_03986         | acrB, Resistance-nodulation-cell division transporter system. Mu    | chrom            |                                                                       |                           |
| 2345        | MGH_59  | AF45_03407         | acrB, Resistance-nodulation-cell division transporter system. Mu    | chrom            |                                                                       |                           |
| 2362        | MGH_31  | L377_01599         | macB, Resistance-nodulation-cell division transporter system. M     | chrom            |                                                                       |                           |
| 2362        | MGH_59  | AF45_00562         | macB, Resistance-nodulation-cell division transporter system. M     | chrom            |                                                                       |                           |
| 2598        | MGH_31  | L377_04159         | ama, Bifunctional enzyme that catalyzes the oxidative decarbox      | chrom            |                                                                       |                           |
| 2598        | MGH_59  | AF45_03580         | ama, Bifunctional enzyme that catalyzes the oxidative decarbox      | chrom            |                                                                       |                           |
| 2640        | MGH_31  | L377_01555         | metallo-beta-lactamase                                              | chrom            | Beta-lactamase superfamily domain, Metallo-beta-lactamase superfamily | 7.6e-07, 7.6e-32          |
| 2640        | MGH_59  | AF45_00605         | hypothetical protein                                                | chrom            | Beta-lactamase superfamily domain, Metallo-beta-lactamase superfamily | 7.6e-07, 7.6e-32          |
| 2669        | MGH_31  | L377_03891         | D-alanyl-D-alanine carboxypeptidase dacB                            | chrom            | Beta-lactamase enzyme family                                          | 2.10E-08                  |
| 2669        | MGH_59  | AF45_03312         | D-alanyl-D-alanine carboxypeptidase dacB                            | chrom            | Beta-lactamase enzyme family                                          | 2.10E-08                  |

| #cluster id | isolate | Genbank locus name | functional annotation                                            | location of gene | Has beta-lactamase PFAM domain                                        | PFAM domain e-value |
|-------------|---------|--------------------|------------------------------------------------------------------|------------------|-----------------------------------------------------------------------|---------------------|
| 2724        | MGH_31  | L377_00598         | metallo-beta-lactamase                                           | chrom            | Metallo-beta-lactamase superfamily                                    | 2.60E-13            |
| 2724        | MGH_59  | AF45_01562         | hypothetical protein                                             | chrom            | Metallo-beta-lactamase superfamily                                    | 2.60E-13            |
| 2858        | MGH_31  | L377_01034         | metallo-beta-lactamase                                           | chrom            | Metallo-beta-lactamase superfamily                                    | 2.60E-20            |
| 2858        | MGH_59  | AF45_01125         | hypothetical protein                                             | chrom            | Metallo-beta-lactamase superfamily                                    | 2.60E-20            |
| 2894        | MGH_31  | L377_01877         | D-alanyl-D-alanine carboxypeptidase dacA                         | chrom            | Beta-lactamase enzyme family                                          | 1.50E-08            |
| 2894        | MGH_59  | AF45_00270         | D-alanyl-D-alanine carboxypeptidase dacA                         | chrom            | Beta-lactamase enzyme family                                          | 1.50E-08            |
| 2899        | MGH_31  | L377_02847         | bcr, bicyclomycin resistance protein                             | chrom            |                                                                       |                     |
| 2899        | MGH_59  | AF45_02369         | bcr, bicyclomycin resistance protein                             | chrom            |                                                                       |                     |
| 2943        | MGH_31  | L377_02389         | tet34, Xanthine-guanine phosphoribosyltransferase. Mechanism     | chrom            |                                                                       |                     |
| 2943        | MGH_59  | AF45_04843         | tet34, Xanthine-guanine phosphoribosyltransferase. Mechanism     | chrom            |                                                                       |                     |
| 3014        | MGH_31  | L377_00634         | coenzyme PQQ synthesis protein B                                 | chrom            | Beta-lactamase superfamily domain                                     | 1.00E-21            |
| 3014        | MGH_59  | AF45_01527         | coenzyme PQQ synthesis protein B                                 | chrom            | Beta-lactamase superfamily domain                                     | 1.00E-21            |
| 3070        | MGH_31  | L377_02186         | acra, Resistance-nodulation-cell division transporter system. Mu | chrom            |                                                                       |                     |
| 3070        | MGH_59  | AF45_05048         | acra, Resistance-nodulation-cell division transporter system. Mu | chrom            |                                                                       |                     |
| 3281        | MGH_31  | L377_03757         | baca, Undecaprenyl pyrophosphate phosphatase, which consist      | chrom            |                                                                       |                     |
| 3281        | MGH_59  | AF45_03177         | baca, Undecaprenyl pyrophosphate phosphatase, which consist      | chrom            |                                                                       |                     |
| 3373        | MGH_31  | L377_03301         | anaerobic nitric oxide reductase flavorubredoxin                 | chrom            | Metallo-beta-lactamase superfamily                                    | 3.10E-27            |
| 3373        | MGH_59  | AF45_02778         | anaerobic nitric oxide reductase flavorubredoxin                 | chrom            | Metallo-beta-lactamase superfamily                                    | 3.10E-27            |
| 3525        | MGH_31  | L377_00858         | blaSHV-134, SHV                                                  | chrom            | Beta-lactamase, Beta-lactamase enzyme family                          | 1.9e-32, 5.5e-37    |
| 3525        | MGH_59  | AF45_05311         | blaSHV-134, SHV                                                  | undetermined     | Beta-lactamase, Beta-lactamase enzyme family                          | 1.2e-32, 5.6e-37    |
| 3525        | MGH_59  | AF45_01303         | blaSHV-134, SHV                                                  | chrom            | Beta-lactamase, Beta-lactamase enzyme family                          | 1.9e-32, 3.8e-37    |
| 3990        | MGH_31  | L377_04808         | protein phnP                                                     | chrom            | Beta-lactamase superfamily domain                                     | 3.40E-12            |
| 3990        | MGH_59  | AF45_04223         | protein phnP                                                     | chrom            | Beta-lactamase superfamily domain                                     | 3.40E-12            |
| 4100        | MGH_31  | L377_00628         | pbp2, The enzyme has a penicillin-insensitive transglycosylase   | chrom            |                                                                       |                     |
| 4100        | MGH_59  | AF45_01533         | pbp2, The enzyme has a penicillin-insensitive transglycosylase   | chrom            |                                                                       |                     |
| 4135        | MGH_31  | L377_04396         | emrd, Multidrug resistance efflux pump.                          | chrom            |                                                                       |                     |
| 4135        | MGH_59  | AF45_03817         | emrd, Multidrug resistance efflux pump.                          | chrom            |                                                                       |                     |
| 4179        | MGH_31  | L377_02412         | hydroxyacylglutathione hydrolase                                 | chrom            | Beta-lactamase superfamily domain, Metallo-beta-lactamase superfamily | 8.9e-07, 8.2e-31    |
| 4179        | MGH_59  | AF45_04820         | hydroxyacylglutathione hydrolase                                 | chrom            | Beta-lactamase superfamily domain, Metallo-beta-lactamase superfamily | 8.9e-07, 8.2e-31    |
| 4184        | MGH_31  | L377_04772         | metallo-beta-lactamase                                           | chrom            | Beta-lactamase superfamily domain, Metallo-beta-lactamase superfamily | 2.4e-18, 1.3e-10    |
| 4184        | MGH_59  | AF45_04187         | hypothetical protein                                             | chrom            | Beta-lactamase superfamily domain, Metallo-beta-lactamase superfamily | 2.4e-18, 1.3e-10    |
| 4774        | MGH_31  | L377_03223         | oqxB1, resistance to quinolone                                   | chrom            |                                                                       |                     |
| 4774        | MGH_59  | AF45_02700         | oqxB1, resistance to quinolone                                   | chrom            |                                                                       |                     |
| 4832        | MGH_31  | L377_01165         | sul11, resistance to sulphonamide                                | chrom            |                                                                       |                     |
| 4832        | MGH_59  | AF45_05305         | sul11, resistance to sulphonamide                                | undetermined     |                                                                       |                     |
| 4881        | MGH_31  | L377_03222         | oqxA1, resistance to quinolone                                   | chrom            |                                                                       |                     |
| 4881        | MGH_59  | AF45_02699         | oqxA1, resistance to quinolone                                   | chrom            |                                                                       |                     |
| 4903        | MGH_31  | L377_00714         | N-acylhomoserine lactone degradation protein AhlK                | chrom            | Metallo-beta-lactamase superfamily                                    | 4.90E-19            |
| 4903        | MGH_59  | AF45_01447         | hypothetical protein                                             | chrom            | Metallo-beta-lactamase superfamily                                    | 5.40E-19            |
| 4936        | MGH_31  | L377_05446         | beta-lactamase TEM-12                                            | plasm            | Beta-lactamase, Beta-lactamase enzyme family                          | 1.4e-06, 1.1e-07    |
| 4936        | MGH_31  | L377_05447         | beta-lactamase TEM                                               | plasm            | Beta-lactamase, Beta-lactamase enzyme family                          | 6.5e-20, 1.1e-26    |
| 4936        | MGH_59  | AF45_05418         | blaTEM-1B1, resistance to beta-lactam                            | undetermined     | Beta-lactamase, Beta-lactamase enzyme family                          | 1.7e-30, 3e-39      |
| 4936        | MGH_59  | AF45_05151         | blaTEM-1A4, resistance to beta-lactam                            | plasm            | Beta-lactamase, Beta-lactamase enzyme family                          | 1.7e-30, 3e-39      |
| 4936        | MGH_59  | AF45_05409         | blaTEM-1A4, resistance to beta-lactam                            | plasm            | Beta-lactamase, Beta-lactamase enzyme family                          | 1.7e-30, 3e-39      |
| 5465        | MGH_31  | L377_05298         | mph(A)1, resistance to macrolide                                 | plasm            |                                                                       |                     |
| 5465        | MGH_59  | AF45_05163         | mph(A)1, resistance to macrolide                                 | plasm            |                                                                       |                     |



**Table S10. Evaluating accuracy of second round of scaffolding (SSPACE), using SMRT sequencing assemblies as gold standard.**

Accuracy of assemblies of a second round of scaffolding using SSPACE was evaluated by comparing SSPACE assemblies to PacBio assemblies from the same strain. An average accuracy was estimated by dividing the number of correct joins by the total number of joins performed on all seven isolates.

| Isolate | #scaffolds (Illumina based assembly) | #scaffolds after SSPACE (Illumina based assembly) | #number of joins performed by SSPACE | #correct joins | correct joins (%) |
|---------|--------------------------------------|---------------------------------------------------|--------------------------------------|----------------|-------------------|
| G25860  | 52                                   | 14                                                | 38                                   | 35             | 92                |
| G25823  | 74                                   | 30                                                | 44                                   | 37             | 84                |
| G25824  | 26                                   | 14                                                | 12                                   | 11             | 92                |
| G25833  | 28                                   | 14                                                | 14                                   | 11             | 79                |
| G25837  | 28                                   | 11                                                | 17                                   | 16             | 94                |
| G25847  | 27                                   | 10                                                | 17                                   | 15             | 88                |
| G25858  | 9                                    | 7                                                 | 2                                    | 2              | 100               |
| G25863  | 12                                   | 11                                                | 1                                    | 0              | 0                 |

**Average accuracy (%):** 88

**Table S11. Comparison of plasmid detection methods presented by this work and PLACNET.**

| Isolate   | This work                                 |             | PLACNET      |             | Comparison this work vs PLACNET                    |
|-----------|-------------------------------------------|-------------|--------------|-------------|----------------------------------------------------|
|           | Genbank accession of plasmidial scaffolds | Length (kb) | Plasmid name | Length (Kb) | Coverage/Identity                                  |
| BIDMC_20B | NZ_KI929680.1                             | 142.2       | pBIDMC20B_1  | 128         | > 90 % coverage; > 90% identity                    |
| BIDMC_20B | NZ_KI929681.1                             | 109         | pBIDMC20B_2  | 109         | > 90 % coverage; > 90% identity                    |
| BWH_24    | NZ_AXLH01000002.1                         | 164.7       | pBWH24_1     | 123         | > 90 % coverage; > 90% identity                    |
| BWH_24    | NZ_AXLH01000001.1                         | 109.1       | pBWH24_2     | 109         | > 90 % coverage; > 90% identity                    |
| BWH_24    | NZ_AXLH01000004.1                         | 60.8        | pBWH24_3     | 60.3        | > 90 % coverage; > 90% identity                    |
| BIDMC_38  |                                           |             | pBIDMC38_1   | 11.8        | Not reported as a plasmidial sequence by this work |
| BIDMC_38  | NZ_KI535397.1                             | 5.2         | pBIDMC38_2   | 5.3         | > 90 % coverage; > 90% identity                    |
| BIDMC_38  | NZ_KI535402.1                             | 1.6         | pBIDMC38_3   | 1.6         | > 90 % coverage; > 90% identity                    |
| BIDMC_38  | NZ_KI535395.1                             | 3.8         | pBIDMC38_4   | 4.2         | < 30 % coverage (different sequences)              |
| BIDMC_38  | NZ_KI535393.1                             | 127         | pBIDMC38_5   | 123         | > 90 % coverage; > 90% identity                    |

















| Genes associated with antibiotic resistance | Presence(1)/absence(0) on isolates |        |        |           |          |        |                |        |        |                   |        |        |       |                     |        |        |
|---------------------------------------------|------------------------------------|--------|--------|-----------|----------|--------|----------------|--------|--------|-------------------|--------|--------|-------|---------------------|--------|--------|
|                                             | <i>K. pneumoniae</i>               |        |        |           |          |        | <i>E. coli</i> |        |        | <i>E. cloacae</i> |        |        |       | <i>E. aerogenes</i> |        |        |
|                                             | BIDMC_35                           | MGH_31 | MGH_59 | BIDMC_46A | BIDMC_53 | UCI_25 | MGH_57         | UCI_51 | UCI_53 | UCI_29            | UCI_35 | MGH_37 | MGH_4 | MGH_77              | UCI_15 | UCI_27 |
| blaCMY-49                                   | 0                                  | 0      | 0      | 0         | 0        | 0      | 0              | 0      | 0      | 0                 | 0      | 0      | 0     | 0                   | 0      | 0      |
| blaCMY-5                                    | 0                                  | 0      | 0      | 0         | 0        | 0      | 0              | 0      | 0      | 0                 | 0      | 0      | 0     | 0                   | 0      | 0      |
| blaCMY-53                                   | 0                                  | 0      | 0      | 0         | 0        | 0      | 0              | 0      | 0      | 0                 | 0      | 0      | 0     | 0                   | 0      | 0      |
| blaCMY-54                                   | 0                                  | 0      | 0      | 0         | 0        | 0      | 0              | 0      | 0      | 0                 | 0      | 0      | 0     | 0                   | 0      | 0      |
| blaCMY-55                                   | 0                                  | 0      | 0      | 0         | 0        | 0      | 0              | 0      | 0      | 0                 | 0      | 0      | 0     | 0                   | 0      | 0      |
| blaCMY-56                                   | 0                                  | 0      | 0      | 0         | 0        | 0      | 0              | 0      | 0      | 0                 | 0      | 0      | 0     | 0                   | 0      | 0      |
| blaCMY-57                                   | 0                                  | 0      | 0      | 0         | 0        | 0      | 0              | 0      | 0      | 0                 | 0      | 0      | 0     | 0                   | 0      | 0      |
| blaCMY-58                                   | 0                                  | 0      | 0      | 0         | 0        | 0      | 0              | 0      | 0      | 0                 | 0      | 0      | 0     | 0                   | 0      | 0      |
| blaCMY-59                                   | 0                                  | 0      | 0      | 0         | 0        | 0      | 0              | 0      | 0      | 0                 | 0      | 0      | 0     | 0                   | 0      | 0      |
| blaCMY-6                                    | 0                                  | 0      | 0      | 0         | 0        | 0      | 0              | 0      | 0      | 0                 | 0      | 0      | 0     | 0                   | 0      | 0      |
| blaCMY-60                                   | 0                                  | 0      | 0      | 0         | 0        | 0      | 0              | 0      | 0      | 0                 | 0      | 0      | 0     | 0                   | 0      | 0      |
| blaCMY-64                                   | 0                                  | 0      | 0      | 0         | 0        | 0      | 0              | 0      | 0      | 0                 | 0      | 0      | 0     | 0                   | 0      | 0      |
| blaCMY-7                                    | 0                                  | 0      | 0      | 0         | 0        | 0      | 0              | 0      | 0      | 0                 | 0      | 0      | 0     | 0                   | 0      | 0      |
| blaCMY-73                                   | 0                                  | 0      | 0      | 0         | 0        | 0      | 0              | 0      | 0      | 0                 | 0      | 0      | 0     | 0                   | 0      | 0      |
| blaCMY-8                                    | 0                                  | 0      | 0      | 0         | 0        | 0      | 0              | 0      | 0      | 0                 | 0      | 0      | 0     | 0                   | 0      | 0      |
| blaCMY-9                                    | 0                                  | 0      | 0      | 0         | 0        | 0      | 0              | 0      | 0      | 0                 | 0      | 0      | 0     | 0                   | 0      | 0      |
| blaCTX-M-1                                  | 0                                  | 0      | 1      | 0         | 0        | 0      | 1              | 1      | 1      | 0                 | 0      | 0      | 0     | 0                   | 0      | 0      |
| blaCTX-M-10                                 | 0                                  | 0      | 1      | 0         | 0        | 0      | 1              | 1      | 1      | 0                 | 0      | 0      | 0     | 0                   | 0      | 0      |
| blaCTX-M-100                                | 0                                  | 0      | 0      | 0         | 0        | 0      | 0              | 0      | 0      | 0                 | 0      | 0      | 0     | 0                   | 0      | 0      |
| blaCTX-M-101                                | 0                                  | 0      | 1      | 0         | 0        | 0      | 1              | 1      | 1      | 0                 | 0      | 0      | 0     | 0                   | 0      | 0      |
| blaCTX-M-102                                | 0                                  | 0      | 0      | 0         | 0        | 1      | 0              | 0      | 0      | 0                 | 0      | 0      | 0     | 0                   | 0      | 0      |
| blaCTX-M-105                                | 0                                  | 0      | 0      | 0         | 0        | 1      | 0              | 0      | 0      | 0                 | 0      | 0      | 0     | 0                   | 0      | 0      |
| blaCTX-M-106                                | 0                                  | 0      | 0      | 0         | 0        | 1      | 0              | 0      | 0      | 0                 | 0      | 0      | 0     | 0                   | 0      | 0      |
| blaCTX-M-107                                | 0                                  | 0      | 1      | 0         | 0        | 0      | 1              | 1      | 1      | 0                 | 0      | 0      | 0     | 0                   | 0      | 0      |
| blaCTX-M-108                                | 0                                  | 0      | 1      | 0         | 0        | 0      | 1              | 1      | 1      | 0                 | 0      | 0      | 0     | 0                   | 0      | 0      |
| blaCTX-M-109                                | 0                                  | 0      | 1      | 0         | 0        | 0      | 1              | 1      | 1      | 0                 | 0      | 0      | 0     | 0                   | 0      | 0      |
| blaCTX-M-11                                 | 0                                  | 0      | 1      | 0         | 0        | 0      | 1              | 1      | 1      | 0                 | 0      | 0      | 0     | 0                   | 0      | 0      |
| blaCTX-M-110                                | 0                                  | 0      | 0      | 0         | 0        | 1      | 0              | 0      | 0      | 0                 | 0      | 0      | 0     | 0                   | 0      | 0      |
| blaCTX-M-111                                | 0                                  | 0      | 0      | 0         | 0        | 1      | 0              | 0      | 0      | 0                 | 0      | 0      | 0     | 0                   | 0      | 0      |
| blaCTX-M-112                                | 0                                  | 0      | 0      | 0         | 0        | 1      | 0              | 0      | 0      | 0                 | 0      | 0      | 0     | 0                   | 0      | 0      |
| blaCTX-M-113                                | 0                                  | 0      | 0      | 0         | 0        | 1      | 0              | 0      | 0      | 0                 | 0      | 0      | 0     | 0                   | 0      | 0      |
| blaCTX-M-114                                | 0                                  | 0      | 1      | 0         | 0        | 0      | 1              | 1      | 1      | 0                 | 0      | 0      | 0     | 0                   | 0      | 0      |
| blaCTX-M-116                                | 0                                  | 0      | 1      | 0         | 0        | 0      | 1              | 1      | 1      | 0                 | 0      | 0      | 0     | 0                   | 0      | 0      |
| blaCTX-M-12                                 | 0                                  | 0      | 1      | 0         | 0        | 0      | 1              | 1      | 1      | 0                 | 0      | 0      | 0     | 0                   | 0      | 0      |































































| Genes associated with antibiotic resistance | Presence(1)/absence(0) on isolates |        |        |           |          |        |                |        |        |                   |        |        |       |                     |        |        |
|---------------------------------------------|------------------------------------|--------|--------|-----------|----------|--------|----------------|--------|--------|-------------------|--------|--------|-------|---------------------|--------|--------|
|                                             | <i>K. pneumoniae</i>               |        |        |           |          |        | <i>E. coli</i> |        |        | <i>E. cloacae</i> |        |        |       | <i>E. aerogenes</i> |        |        |
|                                             | BIDMC_35                           | MGH_31 | MGH_59 | BIDMC_46A | BIDMC_53 | UCI_25 | MGH_57         | UCI_51 | UCI_53 | UCI_29            | UCI_35 | MGH_37 | MGH_4 | MGH_77              | UCI_15 | UCI_27 |
| otrC                                        | 0                                  | 0      | 0      | 0         | 0        | 0      | 0              | 0      | 0      | 0                 | 0      | 0      | 0     | 0                   | 0      | 0      |
| penA                                        | 0                                  | 0      | 0      | 0         | 0        | 0      | 0              | 0      | 0      | 0                 | 0      | 0      | 0     | 0                   | 0      | 0      |
| pexA                                        | 0                                  | 0      | 0      | 0         | 0        | 0      | 0              | 0      | 0      | 0                 | 0      | 0      | 0     | 0                   | 0      | 0      |
| qepA                                        | 0                                  | 0      | 0      | 0         | 0        | 0      | 0              | 0      | 0      | 0                 | 0      | 0      | 0     | 0                   | 0      | 0      |
| qepA2                                       | 0                                  | 0      | 0      | 0         | 0        | 0      | 0              | 0      | 0      | 0                 | 0      | 0      | 0     | 0                   | 0      | 0      |
| Qnr-A1                                      | 0                                  | 0      | 0      | 0         | 0        | 0      | 0              | 0      | 0      | 0                 | 0      | 0      | 0     | 0                   | 0      | 0      |
| Qnr-A2                                      | 0                                  | 0      | 0      | 0         | 0        | 0      | 0              | 0      | 0      | 0                 | 0      | 0      | 0     | 0                   | 0      | 0      |
| Qnr-A3                                      | 0                                  | 0      | 0      | 0         | 0        | 0      | 0              | 0      | 0      | 0                 | 0      | 0      | 0     | 0                   | 0      | 0      |
| Qnr-A4                                      | 0                                  | 0      | 0      | 0         | 0        | 0      | 0              | 0      | 0      | 0                 | 0      | 0      | 0     | 0                   | 0      | 0      |
| Qnr-A5                                      | 0                                  | 0      | 0      | 0         | 0        | 0      | 0              | 0      | 0      | 0                 | 0      | 0      | 0     | 0                   | 0      | 0      |
| Qnr-A6                                      | 0                                  | 0      | 0      | 0         | 0        | 0      | 0              | 0      | 0      | 0                 | 0      | 0      | 0     | 0                   | 0      | 0      |
| Qnr-A7                                      | 0                                  | 0      | 0      | 0         | 0        | 0      | 0              | 0      | 0      | 0                 | 0      | 0      | 0     | 0                   | 0      | 0      |
| Qnr-AS                                      | 0                                  | 0      | 0      | 0         | 0        | 0      | 0              | 0      | 0      | 0                 | 0      | 0      | 0     | 0                   | 0      | 0      |
| Qnr-B1                                      | 0                                  | 0      | 0      | 0         | 0        | 0      | 0              | 0      | 0      | 0                 | 1      | 0      | 0     | 0                   | 0      | 0      |
| Qnr-B10                                     | 0                                  | 0      | 0      | 0         | 0        | 0      | 0              | 0      | 0      | 0                 | 1      | 0      | 0     | 0                   | 0      | 0      |
| Qnr-B11                                     | 0                                  | 0      | 0      | 0         | 0        | 0      | 0              | 0      | 0      | 0                 | 1      | 0      | 0     | 0                   | 0      | 0      |
| Qnr-B12                                     | 0                                  | 0      | 0      | 0         | 0        | 0      | 0              | 0      | 0      | 0                 | 0      | 0      | 0     | 0                   | 0      | 0      |
| Qnr-B13                                     | 0                                  | 0      | 0      | 0         | 0        | 0      | 0              | 0      | 0      | 0                 | 1      | 0      | 0     | 0                   | 0      | 0      |
| Qnr-B14                                     | 0                                  | 0      | 0      | 0         | 0        | 0      | 0              | 0      | 0      | 0                 | 0      | 0      | 0     | 0                   | 0      | 0      |
| Qnr-B15                                     | 0                                  | 0      | 0      | 0         | 0        | 0      | 0              | 0      | 0      | 0                 | 1      | 0      | 0     | 0                   | 0      | 0      |
| Qnr-B17                                     | 0                                  | 0      | 0      | 0         | 0        | 0      | 0              | 0      | 0      | 0                 | 1      | 0      | 0     | 0                   | 0      | 0      |
| Qnr-B18                                     | 0                                  | 0      | 0      | 0         | 0        | 0      | 0              | 0      | 0      | 0                 | 1      | 0      | 0     | 0                   | 0      | 0      |
| Qnr-B19                                     | 0                                  | 0      | 0      | 0         | 0        | 0      | 0              | 0      | 0      | 0                 | 1      | 0      | 0     | 0                   | 0      | 0      |
| Qnr-B2                                      | 0                                  | 0      | 0      | 0         | 0        | 0      | 0              | 0      | 0      | 0                 | 1      | 0      | 0     | 0                   | 0      | 0      |
| Qnr-B20                                     | 0                                  | 0      | 0      | 0         | 0        | 0      | 0              | 0      | 0      | 0                 | 1      | 0      | 0     | 0                   | 0      | 0      |
| Qnr-B21                                     | 0                                  | 0      | 0      | 0         | 0        | 0      | 0              | 0      | 0      | 0                 | 0      | 0      | 0     | 0                   | 0      | 0      |
| Qnr-B22                                     | 0                                  | 0      | 0      | 0         | 0        | 0      | 0              | 0      | 0      | 0                 | 0      | 0      | 0     | 0                   | 0      | 0      |
| Qnr-B23                                     | 0                                  | 0      | 0      | 0         | 0        | 0      | 0              | 0      | 0      | 0                 | 1      | 0      | 0     | 0                   | 0      | 0      |
| Qnr-B24                                     | 0                                  | 0      | 0      | 0         | 0        | 0      | 0              | 0      | 0      | 0                 | 1      | 0      | 0     | 0                   | 0      | 0      |
| Qnr-B25                                     | 0                                  | 0      | 0      | 0         | 0        | 0      | 0              | 0      | 0      | 0                 | 0      | 0      | 0     | 0                   | 0      | 0      |
| Qnr-B26                                     | 0                                  | 0      | 0      | 0         | 0        | 0      | 0              | 0      | 0      | 0                 | 1      | 0      | 0     | 0                   | 0      | 0      |
| Qnr-B27                                     | 0                                  | 0      | 0      | 0         | 0        | 0      | 0              | 0      | 0      | 0                 | 0      | 0      | 0     | 0                   | 0      | 0      |
| Qnr-B28                                     | 0                                  | 0      | 0      | 0         | 0        | 0      | 0              | 0      | 0      | 0                 | 0      | 0      | 0     | 0                   | 0      | 0      |
| Qnr-B29                                     | 0                                  | 0      | 0      | 0         | 0        | 0      | 0              | 0      | 0      | 0                 | 1      | 0      | 0     | 0                   | 0      | 0      |















**Table S13. Beta-lactamases and porin truncations detected in isolates with unknown genetic determinants for carbapenem resistance.**

| <b>Beta-lactamases and porin truncations found in isolates from Boston Prospective Collection with unknown genetic determinant for carbapenem resistance</b> |                    |                |                                                                                 |                                                                               |
|--------------------------------------------------------------------------------------------------------------------------------------------------------------|--------------------|----------------|---------------------------------------------------------------------------------|-------------------------------------------------------------------------------|
| <b>Species</b>                                                                                                                                               | <b>Collection</b>  | <b>Isolate</b> | <b>Genes in the assembly that might be associated with meropenem resistance</b> | <b>Additional genes detected by read-based analysis</b>                       |
| <i>K. pneumoniae</i>                                                                                                                                         | Boston prospective | BIDMC_46A      | <i>bla</i> TEM-1, truncated OmpK36                                              |                                                                               |
| <i>K. pneumoniae</i>                                                                                                                                         | Boston prospective | BIDMC_53       | <i>bla</i> TEM-1, truncated OmpK36                                              |                                                                               |
| <i>E. cloacae</i>                                                                                                                                            | Boston prospective | MGH_37         | <i>bla</i> ACT-9-like                                                           |                                                                               |
| <i>K. pneumoniae</i>                                                                                                                                         | Boston prospective | MGH_31         |                                                                                 | <i>bla</i> TEM-like; gene spans a contig break                                |
| <i>K. pneumoniae</i>                                                                                                                                         | Boston prospective | MGH_59         | <i>bla</i> TEM                                                                  | <i>bla</i> CTX-like, <i>bla</i> OXA; both are truncated genes in the assembly |
| <i>K. pneumoniae</i>                                                                                                                                         | Boston prospective | BIDMC_35       | <i>bla</i> OXA-10                                                               |                                                                               |
| <i>E. aerogenes</i>                                                                                                                                          | Boston prospective | MGH_77         |                                                                                 |                                                                               |

| <b>Beta-lactamases and porin truncations found in isolates from Irvine with unknown genetic determinant for carbapenem resistance</b> |                    |        |                                                          |  |
|---------------------------------------------------------------------------------------------------------------------------------------|--------------------|--------|----------------------------------------------------------|--|
| <i>E. cloacae</i>                                                                                                                     | Irvine prospective | UCI_35 | <i>bla</i> ACT-16-like, truncated OmpC, absent OmpD      |  |
| <i>E. coli</i>                                                                                                                        | Irvine prospective | UCI_51 | <i>bla</i> CTX-M-15, <i>bla</i> OXA-30, <i>bla</i> TEM-1 |  |
| <i>E. coli</i>                                                                                                                        | Irvine prospective | UCI_53 | <i>bla</i> CTX-M-15, <i>bla</i> OXA-30                   |  |
| <i>K. pneumoniae</i>                                                                                                                  | Irvine prospective | UCI_25 | <i>bla</i> CTX-M-14, truncated OmpK36                    |  |
| <i>E. cloacae</i>                                                                                                                     | Irvine prospective | UCI_29 | <i>bla</i> ACT-9-like                                    |  |
| <i>E. aerogenes</i>                                                                                                                   | Irvine prospective | UCI_27 |                                                          |  |

| <b>Beta-lactamases and porin truncations found in isolates from Boston Historical Collection with unknown genetic determinant for carbapenem resistance</b> |                   |       |                                        |  |
|-------------------------------------------------------------------------------------------------------------------------------------------------------------|-------------------|-------|----------------------------------------|--|
| <i>E. cloacae</i>                                                                                                                                           | Boston historical | MGH_4 | <i>bla</i> ACT-14-like, truncated OmpF |  |

Table S14. Detailed analysis of porin encoding genes from non-susceptible isolates.

Grey cells indicate porins from the same isolate

| species              | isolate name | collection         | MIC meropenem (ug/ml) | beta-lactamases possibly associated with meropenem resistance | putatively inactivated porin | Events detected in porins                                                                                         | Length of CDS when compared to reference gene (only for truncated porins) |
|----------------------|--------------|--------------------|-----------------------|---------------------------------------------------------------|------------------------------|-------------------------------------------------------------------------------------------------------------------|---------------------------------------------------------------------------|
| <i>E. coli</i>       | BWH_40       | Boston prospective | 2                     | blaCTX-M-15                                                   | OmpF                         | indel frameshift/premature STOP codon                                                                             | 71%                                                                       |
| <i>K. pneumoniae</i> | MGH_63       | Boston prospective | 8                     | bla CTX-M-15                                                  | OmpK35                       | indel frameshift/premature STOP codon                                                                             | 70%                                                                       |
| <i>K. pneumoniae</i> | MGH_65       | Boston prospective | 8                     | bla CTX-M-15                                                  | OmpK35                       | indel frameshift/premature STOP codon                                                                             | 70%                                                                       |
| <i>K. pneumoniae</i> | MGH_75       | Boston prospective | 4                     | bla CTX-M-15                                                  | OmpK35                       | indel frameshift/premature STOP codon                                                                             | 70%                                                                       |
| <i>K. pneumoniae</i> | MGH_43       | Boston prospective | 4                     | bla CTX-M-15, bla OXA-30, bla TEM-1                           | OmpK36                       | non-sense mutation + non-synonymous substitutions                                                                 | 86%                                                                       |
| <i>K. pneumoniae</i> | MGH_35       | Boston prospective | 2                     | bla CTX-M-15                                                  | OmpK36                       | indel frameshift/premature STOP codon                                                                             | 32%                                                                       |
| <i>K. pneumoniae</i> | MGH_47       | Boston prospective | 4                     |                                                               | OmpK35                       | disruption by IS element                                                                                          | 78%                                                                       |
| <i>K. pneumoniae</i> | MGH_47       | Boston prospective | 4                     |                                                               | OmpK36                       | non-sense mutation                                                                                                | 34%                                                                       |
| <i>K. pneumoniae</i> | BIDMC_46A    | Boston prospective | 2                     | bla TEM-1                                                     | OmpK36 copy 1                | non-sense mutation                                                                                                | 26%                                                                       |
| <i>K. pneumoniae</i> | BIDMC_46A    | Boston prospective | 2                     | bla TEM-1                                                     | OmpK36 copy 2                | indel frameshift/premature STOP codon                                                                             | 56%                                                                       |
| <i>K. pneumoniae</i> | BIDMC_53     | Boston prospective | 2                     | bla TEM-1                                                     | OmpK36                       | non-sense mutation                                                                                                | 26%                                                                       |
| <i>K. pneumoniae</i> | BIDMC_53     | Boston prospective | 2                     | bla TEM-1                                                     | OmpK36                       | indel frameshift/premature STOP codon                                                                             | 56%                                                                       |
| <i>E. coli</i>       | MGH_57       | Boston prospective | >32                   | bla CTX-M-15                                                  | OmpC                         | non-sense mutation                                                                                                | 32%                                                                       |
| <i>K. pneumoniae</i> | BIDMC_35     | Boston prospective | >32                   | bla OXA-10                                                    | OmpK36                       | first 25 aa and 3 aa along the sequence are different than orthologs in susceptible and non-susceptible isolates. |                                                                           |
| <i>K. pneumoniae</i> | MGH_31       | Boston prospective | 4                     |                                                               | OmpK36                       | two aa different than orthologs in susceptible and non-susceptible isolates                                       |                                                                           |
| <i>E. cloacae</i>    | MGH_37       | Boston prospective | 4                     | blaACT-9-like                                                 | OmpC                         | no truncation, less than 80% similarity with reference OmpC.                                                      |                                                                           |
| <i>E. cloacae</i>    | MGH_37       | Boston prospective | 4                     | blaACT-9-like                                                 | OmpF                         | no truncation, less than 80% similarity with reference OmpF                                                       |                                                                           |
| <i>E. cloacae</i>    | MGH_4        | Boston historical  | 4                     | bla ACT-14-like                                               | OmpF                         | indel frameshift/premature STOP codon                                                                             | 67%                                                                       |
| <i>K. pneumoniae</i> | UCI_25       | Irvine prospective | >=4                   | bla CTX-M-14                                                  | OmpK36                       | non-sense mutation                                                                                                | 50%                                                                       |
| <i>E. cloacae</i>    | UCI_35       | Irvine prospective | 4                     | bla ACT-16-like                                               | OmpC                         | indel frameshift/premature STOP codon                                                                             | 67%                                                                       |
| <i>E. cloacae</i>    | UCI_35       | Irvine prospective | 4                     | bla ACT-16-like                                               | OmpD                         | absent in assembly and reads                                                                                      |                                                                           |
| <i>E. coli</i>       | UCI_51       | Irvine prospective | >=4                   | bla CTX-M-15, bla OXA-30, bla TEM-1                           | OmpC                         | one aa different than orthologs in susceptible and non-susceptible isolates                                       |                                                                           |
| <i>E. cloacae</i>    | UCI_29       | Irvine prospective | 2                     | blaACT-9-like                                                 | OmpC                         | no truncation, less than 80% similarity with reference OmpC.                                                      |                                                                           |
| <i>E. cloacae</i>    | UCI_29       | Irvine prospective | 2                     | blaACT-9-like                                                 | OmpF                         | no truncation, less than 80% similarity with reference OmpF                                                       |                                                                           |

| Table S15. Location of plasmidial genes associated with antibiotic resistance |              |                                                               |                     |                    |                                  |                  |            |
|-------------------------------------------------------------------------------|--------------|---------------------------------------------------------------|---------------------|--------------------|----------------------------------|------------------|------------|
| species                                                                       | isolate name | resistance phenotype<br>(N=NON-SUSCEPTIBLE;<br>S=SUSCEPTIBLE) | putative<br>plasmid | Best hit Genbank   | Genbank accession<br>of best hit | plasmid replicon | gene name  |
| kpneumoniae                                                                   | BIDMC_35     | N                                                             | 1                   |                    |                                  | IncA/C2          | Qnr-B4     |
| kpneumoniae                                                                   | BIDMC_35     | N                                                             | 1                   |                    |                                  | IncA/C2          | aadA1      |
| kpneumoniae                                                                   | BIDMC_35     | N                                                             | 1                   |                    |                                  | IncA/C2          | blaOXA-10  |
| kpneumoniae                                                                   | BIDMC_35     | N                                                             | 1                   |                    |                                  | IncA/C2          | floR       |
| kpneumoniae                                                                   | BIDMC_35     | N                                                             | 1                   |                    |                                  | IncA/C2          | sul2       |
| kpneumoniae                                                                   | BIDMC_35     | N                                                             | 1                   |                    |                                  | IncA/C2          | tet(D)     |
| ecoli                                                                         | BIDMC_20B    | N                                                             | 1                   | pEK499             | EU935739.1                       | IncFIA           | aadA5      |
| ecoli                                                                         | BIDMC_20B    | N                                                             | 1                   | pEK499             | EU935739.1                       | IncFIA           | blaKPC-3   |
| ecoli                                                                         | BIDMC_20B    | N                                                             | 1                   | pEK499             | EU935739.1                       | IncFIA           | dfrA17     |
| ecoli                                                                         | BIDMC_20B    | N                                                             | 1                   | pEK499             | EU935739.1                       | IncFIA           | strA       |
| ecoli                                                                         | BIDMC_20B    | N                                                             | 1                   | pEK499             | EU935739.1                       | IncFIA           | strB       |
| ecoli                                                                         | BIDMC_20B    | N                                                             | 1                   | pEK499             | EU935739.1                       | IncFIA           | sul1       |
| ecoli                                                                         | BIDMC_20B    | N                                                             | 1                   | pEK499             | EU935739.1                       | IncFIA           | sul2       |
| ecoli                                                                         | BIDMC_20B    | N                                                             | 1                   | pEK499             | EU935739.1                       | IncFIA           | tet(A)     |
| kpneumoniae                                                                   | UCI_59       | N                                                             | 1                   | plasmid_9_strain_9 | FJ223607.1                       | IncN             | blaKPC-2   |
| kpneumoniae                                                                   | UCI_59       | N                                                             | 1                   | plasmid_9_strain_9 | FJ223607.1                       | IncN             | blaTEM-1   |
| kpneumoniae                                                                   | UCI_59       | N                                                             | 2                   |                    |                                  | ColRNAI          | aac(6)-Ib  |
| kpneumoniae                                                                   | UCI_59       | N                                                             | 2                   |                    |                                  | ColRNAI          | blaTEM-1   |
| kpneumoniae                                                                   | UCI_59       | N                                                             | 3                   |                    |                                  |                  | aadA1      |
| kpneumoniae                                                                   | UCI_59       | N                                                             | 3                   |                    |                                  |                  | sul2       |
| kpneumoniae                                                                   | UCI_59       | N                                                             | 3                   |                    |                                  |                  | tet(B)     |
| kpneumoniae                                                                   | UCI_59       | N                                                             | 4                   |                    |                                  |                  | aac(6)-Ib  |
| kpneumoniae                                                                   | UCI_38       | S                                                             | 1                   |                    |                                  | IncX3            | aph(3)-Ia  |
| kpneumoniae                                                                   | BWH_22       | N                                                             | 1                   |                    |                                  | IncR             | aac(3)-IVa |
| kpneumoniae                                                                   | BWH_22       | N                                                             | 1                   |                    |                                  | IncR             | aac(6)-Ib  |
| kpneumoniae                                                                   | BWH_22       | N                                                             | 1                   |                    |                                  | IncR             | aadA1      |
| kpneumoniae                                                                   | BWH_22       | N                                                             | 1                   |                    |                                  | IncR             | aadA2      |
| kpneumoniae                                                                   | BWH_22       | N                                                             | 1                   |                    |                                  | IncR             | aph(4)-Ia  |
| kpneumoniae                                                                   | BWH_22       | N                                                             | 1                   |                    |                                  | IncR             | blaKPC-2   |
| kpneumoniae                                                                   | BWH_22       | N                                                             | 1                   |                    |                                  | IncR             | blaTEM-1   |
| kpneumoniae                                                                   | BWH_22       | N                                                             | 1                   |                    |                                  | IncR             | cmlA1      |
| kpneumoniae                                                                   | BWH_22       | N                                                             | 1                   |                    |                                  | IncR             | sul3       |
| ecloacae                                                                      | MGH_3        | N                                                             | 1                   |                    |                                  |                  | aac3iia    |
| ecloacae                                                                      | MGH_3        | N                                                             | 1                   |                    |                                  |                  | aph(3)-Ia  |
| ecloacae                                                                      | MGH_3        | N                                                             | 1                   |                    |                                  |                  | blaTEM-1   |
| ecloacae                                                                      | MGH_3        | N                                                             | 2                   |                    |                                  |                  | aac(6)-Ib  |
| ecloacae                                                                      | MGH_3        | N                                                             | 2                   |                    |                                  |                  | aadA1      |
| ecloacae                                                                      | MGH_3        | N                                                             | 2                   |                    |                                  |                  | blaKPC-3   |
| ecloacae                                                                      | MGH_3        | N                                                             | 2                   |                    |                                  |                  | blaOXA-9   |
| ecloacae                                                                      | MGH_3        | N                                                             | 2                   |                    |                                  |                  | blaSHV-38  |





| species     | isolate name | resistance phenotype<br>(N=NON-SUSCEPTIBLE;<br>S=SUSCEPTIBLE) | putative<br>plasmid | Best hit Genbank       | Genbank accession<br>of best hit | plasmid replicon | gene name   |
|-------------|--------------|---------------------------------------------------------------|---------------------|------------------------|----------------------------------|------------------|-------------|
| eaerogenes  | MGH_77       | N                                                             | 1                   |                        |                                  |                  | bcra        |
| eaerogenes  | MGH_77       | N                                                             | 1                   |                        |                                  |                  | fosA        |
| eaerogenes  | MGH_77       | N                                                             | 1                   |                        |                                  |                  | ksga        |
| eaerogenes  | MGH_77       | N                                                             | 2                   |                        |                                  |                  | baca        |
| eaerogenes  | MGH_77       | N                                                             | 3                   |                        |                                  |                  | CMY-48      |
| eaerogenes  | MGH_77       | N                                                             | 3                   |                        |                                  |                  | bcr         |
| eaerogenes  | MGH_77       | N                                                             | 3                   |                        |                                  |                  | bcra        |
| eaerogenes  | MGH_77       | N                                                             | 3                   |                        |                                  |                  | mdfa        |
| eaerogenes  | MGH_77       | N                                                             | 3                   |                        |                                  |                  | oqxB        |
| eaerogenes  | MGH_77       | N                                                             | 3                   |                        |                                  |                  | tet34       |
|             |              |                                                               |                     |                        |                                  |                  |             |
| kpneumoniae | BIDMC_42B    | N                                                             | 1                   |                        |                                  |                  | catA1       |
|             |              |                                                               |                     |                        |                                  |                  |             |
| kpneumoniae | BIDMC_45     | N                                                             | 1                   |                        |                                  | ColRNAI          | aac(6)-Ib   |
| kpneumoniae | BIDMC_45     | N                                                             | 2                   |                        |                                  | IncR             | aac(3)-IVa  |
| kpneumoniae | BIDMC_45     | N                                                             | 2                   |                        |                                  | IncR             | aadA2       |
| kpneumoniae | BIDMC_45     | N                                                             | 2                   |                        |                                  | IncR             | aph(4)-Ia   |
| kpneumoniae | BIDMC_45     | N                                                             | 2                   |                        |                                  | IncR             | blaKPC-2    |
| kpneumoniae | BIDMC_45     | N                                                             | 2                   |                        |                                  | IncR             | cmIA1       |
| kpneumoniae | BIDMC_45     | N                                                             | 2                   |                        |                                  | IncR             | sul3        |
| kpneumoniae | BIDMC_45     | N                                                             | 3                   | strain_JM45_plasmid_p1 | CP006657.1                       | IncFIB(K)        | aadA2       |
| kpneumoniae | BIDMC_45     | N                                                             | 3                   | strain_JM45_plasmid_p1 | CP006657.1                       | IncFIB(K)        | catA1       |
| kpneumoniae | BIDMC_45     | N                                                             | 3                   | strain_JM45_plasmid_p1 | CP006657.1                       | IncFIB(K)        | dfrA12      |
| kpneumoniae | BIDMC_45     | N                                                             | 3                   | strain_JM45_plasmid_p1 | CP006657.1                       | IncFIB(K)        | mph(A)      |
| kpneumoniae | BIDMC_45     | N                                                             | 3                   | strain_JM45_plasmid_p1 | CP006657.1                       | IncFIB(K)        | sul1        |
|             |              |                                                               |                     |                        |                                  |                  |             |
| cfreundii   | UCI_31       | S                                                             | 1                   |                        |                                  |                  | Qnr-B38     |
| cfreundii   | UCI_31       | S                                                             | 1                   |                        |                                  |                  | arna        |
| cfreundii   | UCI_31       | S                                                             | 1                   |                        |                                  |                  | baca        |
| cfreundii   | UCI_31       | S                                                             | 1                   |                        |                                  |                  | bcr         |
| cfreundii   | UCI_31       | S                                                             | 1                   |                        |                                  |                  | bcra        |
| cfreundii   | UCI_31       | S                                                             | 1                   |                        |                                  |                  | blaCMY-41   |
| cfreundii   | UCI_31       | S                                                             | 1                   |                        |                                  |                  | ksga        |
| cfreundii   | UCI_31       | S                                                             | 1                   |                        |                                  |                  | mdfa        |
| cfreundii   | UCI_31       | S                                                             | 1                   |                        |                                  |                  | tet34       |
|             |              |                                                               |                     |                        |                                  |                  |             |
| kpneumoniae | BIDMC_33B    | N                                                             | 1                   | pUUH239.2              | CP002474.1                       | IncFIB(K)        | aac(6)Ib-cr |
| kpneumoniae | BIDMC_33B    | N                                                             | 1                   | pUUH239.2              | CP002474.1                       | IncFIB(K)        | aadA2       |
| kpneumoniae | BIDMC_33B    | N                                                             | 1                   | pUUH239.2              | CP002474.1                       | IncFIB(K)        | aph(3)-Ia   |
| kpneumoniae | BIDMC_33B    | N                                                             | 1                   | pUUH239.2              | CP002474.1                       | IncFIB(K)        | blaOXA-30   |
| kpneumoniae | BIDMC_33B    | N                                                             | 1                   | pUUH239.2              | CP002474.1                       | IncFIB(K)        | blaTEM-1    |
| kpneumoniae | BIDMC_33B    | N                                                             | 1                   | pUUH239.2              | CP002474.1                       | IncFIB(K)        | dfrA12      |
| kpneumoniae | BIDMC_33B    | N                                                             | 1                   | pUUH239.2              | CP002474.1                       | IncFIB(K)        | mph(A)      |
| kpneumoniae | BIDMC_33B    | N                                                             | 1                   | pUUH239.2              | CP002474.1                       | IncFIB(K)        | sul1        |
| kpneumoniae | BIDMC_33B    | N                                                             | 1                   | pUUH239.2              | CP002474.1                       | IncFIB(K)        | tet(A)      |
| kpneumoniae | BIDMC_33B    | N                                                             | 2                   |                        |                                  |                  | aac(6)-Ib   |
| kpneumoniae | BIDMC_33B    | N                                                             | 2                   |                        |                                  |                  | aadA1       |
| kpneumoniae | BIDMC_33B    | N                                                             | 2                   |                        |                                  |                  | blaKPC-3    |
|             |              |                                                               |                     |                        |                                  |                  |             |

| species     | isolate name | resistance phenotype<br>(N=NON-SUSCEPTIBLE;<br>S=SUSCEPTIBLE) | putative<br>plasmid | Best hit Genbank | Genbank accession<br>of best hit | plasmid replicon | gene name   |
|-------------|--------------|---------------------------------------------------------------|---------------------|------------------|----------------------------------|------------------|-------------|
| kpneumoniae | MGH_31       | N                                                             | 1                   |                  |                                  | IncFIB(K)        | aac(6)-Ib   |
| kpneumoniae | MGH_31       | N                                                             | 1                   |                  |                                  | IncFIB(K)        | mph(A)      |
| kpneumoniae | MGH_31       | N                                                             | 2                   |                  |                                  | IncR             | aac(3)-IVa  |
| kpneumoniae | MGH_31       | N                                                             | 2                   |                  |                                  | IncR             | aadA1       |
| kpneumoniae | MGH_31       | N                                                             | 2                   |                  |                                  | IncR             | aadA2       |
| kpneumoniae | MGH_31       | N                                                             | 2                   |                  |                                  | IncR             | aph(4)-Ia   |
| kpneumoniae | MGH_31       | N                                                             | 2                   |                  |                                  | IncR             | cmlA1       |
| kpneumoniae | MGH_31       | N                                                             | 2                   |                  |                                  | IncR             | sul3        |
| kpneumoniae | MGH_31       | N                                                             | 3                   |                  |                                  |                  | tet(D)      |
|             |              |                                                               |                     |                  |                                  |                  |             |
| ecoli       | BIDMC_20A    | N                                                             | 1                   |                  |                                  |                  | strA        |
| ecoli       | BIDMC_20A    | N                                                             | 1                   |                  |                                  |                  | strB        |
| ecoli       | BIDMC_20A    | N                                                             | 1                   |                  |                                  |                  | sul2        |
| ecoli       | BIDMC_20A    | N                                                             | 2                   | pEK499           | EU935739.1                       | IncFIA           | aadA5       |
| ecoli       | BIDMC_20A    | N                                                             | 2                   | pEK499           | EU935739.1                       | IncFIA           | dfrA17      |
| ecoli       | BIDMC_20A    | N                                                             | 2                   | pEK499           | EU935739.1                       | IncFIA           | sul1        |
| ecoli       | BIDMC_20A    | N                                                             | 3                   | pEK499           | EU935739.1                       | IncFII           | tet(A)      |
| ecoli       | BIDMC_20A    | N                                                             | 3                   | pEK499           | EU935739.1                       | IncFII           | blaKPC-3    |
|             |              |                                                               |                     |                  |                                  |                  |             |
| ecoli       | BIDMC_76     | S                                                             | 1                   |                  |                                  | IncFIB(AP001918) | blaTEM-1    |
|             |              |                                                               |                     |                  |                                  |                  |             |
| kpneumoniae | MGH_72       | S                                                             | 1                   |                  |                                  |                  | aac(3)-IIId |
| kpneumoniae | MGH_72       | S                                                             | 1                   |                  |                                  |                  | blaTEM-1    |
| kpneumoniae | MGH_72       | S                                                             | 1                   |                  |                                  |                  | floR        |
| kpneumoniae | MGH_72       | S                                                             | 1                   |                  |                                  |                  | strA        |
| kpneumoniae | MGH_72       | S                                                             | 1                   |                  |                                  |                  | strB        |
| kpneumoniae | MGH_72       | S                                                             | 1                   |                  |                                  |                  | sul2        |
| kpneumoniae | MGH_72       | S                                                             | 1                   |                  |                                  |                  | tet(A)      |
| kpneumoniae | MGH_72       | S                                                             | 2                   |                  |                                  |                  | tet(A)      |
|             |              |                                                               |                     |                  |                                  |                  |             |
| smarcesens  | BIDMC_81     | S                                                             | 1                   |                  |                                  |                  | tet34       |
| smarcesens  | BIDMC_81     | S                                                             | 2                   |                  |                                  |                  | aac(6)-Ic   |
| smarcesens  | BIDMC_81     | S                                                             | 2                   |                  |                                  |                  | baca        |
| smarcesens  | BIDMC_81     | S                                                             | 3                   |                  |                                  |                  | arna        |
| smarcesens  | BIDMC_81     | S                                                             | 4                   |                  |                                  |                  | bl1_sm      |
| smarcesens  | BIDMC_81     | S                                                             | 4                   |                  |                                  |                  | tet(41)     |
| smarcesens  | BIDMC_81     | S                                                             | 5                   |                  |                                  |                  | bcra        |
| smarcesens  | BIDMC_81     | S                                                             | 6                   |                  |                                  |                  | ksga        |
| smarcesens  | BIDMC_81     | S                                                             | 7                   |                  |                                  |                  | qnrB        |
| smarcesens  | BIDMC_81     | S                                                             | 8                   |                  |                                  |                  | oqxB        |
|             |              |                                                               |                     |                  |                                  |                  |             |
| ecoli       | BIDMC_62     | N                                                             | 1                   |                  |                                  |                  | blaKPC-3    |
| ecoli       | BIDMC_62     | N                                                             | 1                   |                  |                                  |                  | strA        |
| ecoli       | BIDMC_62     | N                                                             | 1                   |                  |                                  |                  | strB        |
| ecoli       | BIDMC_62     | N                                                             | 1                   |                  |                                  |                  | sul2        |
| ecoli       | BIDMC_62     | N                                                             | 2                   |                  |                                  | IncN             | aadA5       |
| ecoli       | BIDMC_62     | N                                                             | 2                   |                  |                                  | IncN             | dfrA17      |
| ecoli       | BIDMC_62     | N                                                             | 2                   |                  |                                  | IncN             | sul1        |
| ecoli       | BIDMC_62     | N                                                             | 2                   |                  |                                  | IncN             | tet(A)      |

| species     | isolate name | resistance phenotype<br>(N=NON-SUSCEPTIBLE;<br>S=SUSCEPTIBLE) | putative<br>plasmid | Best hit Genbank       | Genbank accession<br>of best hit | plasmid replicon | gene name  |
|-------------|--------------|---------------------------------------------------------------|---------------------|------------------------|----------------------------------|------------------|------------|
| ecloacae    | MGH_5        | N                                                             | 1                   |                        |                                  |                  | Qnr-S1     |
| ecloacae    | MGH_5        | N                                                             | 2                   | pHCM2                  | AL513384.1                       | IncFIB(pHCM2)    | dfrA15     |
| ecloacae    | MGH_5        | N                                                             | 3                   | pBK31551               | JX193301.1                       | IncN             | aac(3)-Ib  |
| ecloacae    | MGH_5        | N                                                             | 3                   | pBK31551               | JX193301.1                       | IncN             | aph(3)-Ia  |
| ecloacae    | MGH_5        | N                                                             | 3                   | pBK31551               | JX193301.1                       | IncN             | blaKPC-4   |
| ecloacae    | MGH_5        | N                                                             | 3                   | pBK31551               | JX193301.1                       | IncN             | blaTEM-1   |
| ecloacae    | MGH_5        | N                                                             | 3                   | pBK31551               | JX193301.1                       | IncN             | dfrA14     |
| ecloacae    | MGH_5        | N                                                             | 3                   | pBK31551               | JX193301.1                       | IncN             | sul1       |
| kpneumoniae | MGH_45       | N                                                             | 1                   |                        |                                  | IncR             | aac(3)-IVa |
| kpneumoniae | MGH_45       | N                                                             | 1                   |                        |                                  | IncR             | aadA1      |
| kpneumoniae | MGH_45       | N                                                             | 1                   |                        |                                  | IncR             | aadA2      |
| kpneumoniae | MGH_45       | N                                                             | 1                   |                        |                                  | IncR             | aph(4)-Ia  |
| kpneumoniae | MGH_45       | N                                                             | 1                   |                        |                                  | IncR             | blaKPC-2   |
| kpneumoniae | MGH_45       | N                                                             | 1                   |                        |                                  | IncR             | blaTEM-1   |
| kpneumoniae | MGH_45       | N                                                             | 1                   |                        |                                  | IncR             | cmlA1      |
| kpneumoniae | MGH_45       | N                                                             | 1                   |                        |                                  | IncR             | sul3       |
| kpneumoniae | UCI_22       | S                                                             | 1                   |                        |                                  | IncFIB(K)        | aac(6)-Ib  |
| kpneumoniae | UCI_22       | S                                                             | 1                   |                        |                                  | IncFIB(K)        | aadA2      |
| kpneumoniae | UCI_22       | S                                                             | 1                   |                        |                                  | IncFIB(K)        | catA1      |
| kpneumoniae | UCI_22       | S                                                             | 1                   |                        |                                  | IncFIB(K)        | dfrA12     |
| kpneumoniae | UCI_22       | S                                                             | 1                   |                        |                                  | IncFIB(K)        | mph(A)     |
| kpneumoniae | UCI_22       | S                                                             | 1                   |                        |                                  | IncFIB(K)        | sul1       |
| kpneumoniae | UCI_22       | S                                                             | 2                   |                        |                                  |                  | aac(3)-IVa |
| kpneumoniae | UCI_22       | S                                                             | 2                   |                        |                                  |                  | aadA2      |
| kpneumoniae | UCI_22       | S                                                             | 2                   |                        |                                  |                  | aph(4)-Ia  |
| kpneumoniae | UCI_22       | S                                                             | 2                   |                        |                                  |                  | sul3       |
| kpneumoniae | BIDMC_12B    | N                                                             | 1                   | pNJST258N3             | CP006925.1                       | ColRNAI          | aac(6)-Ib  |
| kpneumoniae | BIDMC_12B    | N                                                             | 1                   | pNJST258N3             | CP006925.1                       | ColRNAI          | blaTEM-1   |
| kpneumoniae | BIDMC_12B    | N                                                             | 2                   | pBK30683               | KF954760.1                       | IncFIA(HI1)      | blaKPC-3   |
| kpneumoniae | BIDMC_12B    | N                                                             | 2                   | pBK30683               | KF954760.1                       | IncFIA(HI1)      | blaTEM-1   |
| kpneumoniae | BIDMC_12B    | N                                                             | 2                   | pBK30683               | KF954760.1                       | IncFIA(HI1)      | strA       |
| kpneumoniae | BIDMC_12B    | N                                                             | 2                   | pBK30683               | KF954760.1                       | IncFIA(HI1)      | strB       |
| kpneumoniae | BIDMC_12B    | N                                                             | 2                   | pBK30683               | KF954760.1                       | IncFIA(HI1)      | sul2       |
| kpneumoniae | BIDMC_12B    | N                                                             | 3                   | strain_JM45_plasmid_p1 | CP006657.1                       | IncFIB(K)        | aadA2      |
| kpneumoniae | BIDMC_12B    | N                                                             | 3                   | strain_JM45_plasmid_p1 | CP006657.1                       | IncFIB(K)        | aph(3)-Ia  |
| kpneumoniae | BIDMC_12B    | N                                                             | 3                   | strain_JM45_plasmid_p1 | CP006657.1                       | IncFIB(K)        | catA1      |
| kpneumoniae | BIDMC_12B    | N                                                             | 3                   | strain_JM45_plasmid_p1 | CP006657.1                       | IncFIB(K)        | dfrA12     |
| kpneumoniae | BIDMC_12B    | N                                                             | 3                   | strain_JM45_plasmid_p1 | CP006657.1                       | IncFIB(K)        | mph(A)     |
| kpneumoniae | BIDMC_12B    | N                                                             | 3                   | strain_JM45_plasmid_p1 | CP006657.1                       | IncFIB(K)        | sul1       |
| kpneumoniae | UCI_8        | S                                                             | 1                   |                        |                                  | IncR             | floR       |
| kpneumoniae | UCI_8        | S                                                             | 1                   |                        |                                  | IncR             | sul1       |
| kpneumoniae | UCI_8        | S                                                             | 1                   |                        |                                  | IncR             | tet(A)     |
| ecloacae    | MGH_7        | N                                                             | 1                   |                        |                                  | IncHI1B(CIT)     | aac(6)-Ib  |

| species     | isolate name | resistance phenotype<br>(N=NON-SUSCEPTIBLE;<br>S=SUSCEPTIBLE) | putative<br>plasmid | Best hit Genbank | Genbank accession<br>of best hit | plasmid replicon | gene name  |
|-------------|--------------|---------------------------------------------------------------|---------------------|------------------|----------------------------------|------------------|------------|
| ecloacae    | MGH_7        | N                                                             | 1                   |                  |                                  | IncHI1B(CIT)     | aadA1      |
| ecloacae    | MGH_7        | N                                                             | 1                   |                  |                                  | IncHI1B(CIT)     | blaKPC-3   |
| ecloacae    | MGH_7        | N                                                             | 1                   |                  |                                  | IncHI1B(CIT)     | blaOXA-9   |
| ecloacae    | MGH_7        | N                                                             | 1                   |                  |                                  | IncHI1B(CIT)     | blaSHV-38  |
| ecloacae    | MGH_7        | N                                                             | 1                   |                  |                                  | IncHI1B(CIT)     | blaTEM-1   |
|             |              |                                                               |                     |                  |                                  |                  |            |
| ecoli       | BIDMC_19B    | N                                                             | 1                   |                  |                                  | IncN             | dfrA14     |
| ecoli       | BIDMC_19B    | N                                                             | 2                   | pEC-IMP          | EU855787.1                       | IncHI2A          | aac(6)-IIc |
| ecoli       | BIDMC_19B    | N                                                             | 2                   | pEC-IMP          | EU855787.1                       | IncHI2A          | blaSHV-134 |
| ecoli       | BIDMC_19B    | N                                                             | 2                   | pEC-IMP          | EU855787.1                       | IncHI2A          | ere(A)     |
| ecoli       | BIDMC_19B    | N                                                             | 2                   | pEC-IMP          | EU855787.1                       | IncHI2A          | sul1       |
| ecoli       | BIDMC_19B    | N                                                             | 2                   | pEC-IMP          | EU855787.1                       | IncHI2A          | sul2       |
| ecoli       | BIDMC_19B    | N                                                             | 3                   |                  |                                  |                  | blaKPC-2   |
|             |              |                                                               |                     |                  |                                  |                  |            |
| kpneumoniae | BIDMC_4      | N                                                             | 1                   |                  |                                  | IncR             | aac(3)-IVa |
| kpneumoniae | BIDMC_4      | N                                                             | 1                   |                  |                                  | IncR             | aadA1      |
| kpneumoniae | BIDMC_4      | N                                                             | 1                   |                  |                                  | IncR             | aadA2      |
| kpneumoniae | BIDMC_4      | N                                                             | 1                   |                  |                                  | IncR             | aph(4)-Ia  |
| kpneumoniae | BIDMC_4      | N                                                             | 1                   |                  |                                  | IncR             | cmIA1      |
| kpneumoniae | BIDMC_4      | N                                                             | 1                   |                  |                                  | IncR             | sul3       |
| kpneumoniae | BIDMC_4      | N                                                             | 2                   | pBK15692         | KC845573.1                       | IncI2            | blaKPC-3   |
| kpneumoniae | BIDMC_4      | N                                                             | 2                   | pBK15692         | KC845573.1                       | IncI2            | blaTEM-1   |
|             |              |                                                               |                     |                  |                                  |                  |            |
| kpneumoniae | BWH_36       | I                                                             | 1                   |                  |                                  | IncFIB(K)        | catA1      |
| kpneumoniae | BWH_36       | I                                                             | 2                   | pBK15692         | KC845573.1                       | IncI2            | blaTEM-1   |
|             |              |                                                               |                     |                  |                                  |                  |            |
| kpneumoniae | BIDMC_54     | N                                                             | 1                   |                  |                                  |                  | aadA2      |
| kpneumoniae | BIDMC_54     | N                                                             | 1                   |                  |                                  |                  | dfrA12     |
| kpneumoniae | BIDMC_54     | N                                                             | 1                   |                  |                                  |                  | sul1       |
| kpneumoniae | BIDMC_54     | N                                                             | 2                   | pNJST258C1       | CP006922.1                       |                  | catA1      |
|             |              |                                                               |                     |                  |                                  |                  |            |
| kpneumoniae | UCI_67       | N                                                             | 1                   |                  |                                  |                  | dfrA14     |
| kpneumoniae | UCI_67       | N                                                             | 1                   |                  |                                  |                  | strB       |
| kpneumoniae | UCI_67       | N                                                             | 1                   |                  |                                  |                  | sul2       |
| kpneumoniae | UCI_67       | N                                                             | 2                   |                  |                                  |                  | aadA1      |
| kpneumoniae | UCI_67       | N                                                             | 2                   |                  |                                  |                  | blaOXA-9   |
| kpneumoniae | UCI_67       | N                                                             | 3                   |                  |                                  | ColRNAI          | aac(6)-Ib  |
| kpneumoniae | UCI_67       | N                                                             | 3                   |                  |                                  | ColRNAI          | blaKPC-3   |
| kpneumoniae | UCI_67       | N                                                             | 3                   |                  |                                  | ColRNAI          | blaTEM-1   |
| kpneumoniae | UCI_67       | N                                                             | 4                   |                  |                                  | IncI2            | catA1      |
|             |              |                                                               |                     |                  |                                  |                  |            |
| kpneumoniae | MGH_59       | N                                                             | 1                   |                  |                                  |                  | aadA2      |
| kpneumoniae | MGH_59       | N                                                             | 1                   |                  |                                  |                  | blaSHV-134 |
| kpneumoniae | MGH_59       | N                                                             | 1                   |                  |                                  |                  | dfrA12     |
| kpneumoniae | MGH_59       | N                                                             | 1                   |                  |                                  |                  | sul1       |
| kpneumoniae | MGH_59       | N                                                             | 2                   |                  |                                  |                  | blaTEM-1   |
| kpneumoniae | MGH_59       | N                                                             | 3                   |                  |                                  |                  | aadA1      |
| kpneumoniae | MGH_59       | N                                                             | 3                   |                  |                                  |                  | blaTEM-1   |
| kpneumoniae | MGH_59       | N                                                             | 4                   |                  |                                  | IncFII(pRSB107)  | aac(3)-IId |

| species     | isolate name | resistance phenotype<br>(N=NON-SUSCEPTIBLE;<br>S=SUSCEPTIBLE) | putative<br>plasmid | Best hit Genbank   | Genbank accession<br>of best hit | plasmid replicon | gene name   |
|-------------|--------------|---------------------------------------------------------------|---------------------|--------------------|----------------------------------|------------------|-------------|
| kpneumoniae | MGH_59       | N                                                             | 4                   |                    |                                  | IncFII(pRSB107)  | blaTEM-1    |
| kpneumoniae | MGH_59       | N                                                             | 4                   |                    |                                  | IncFII(pRSB107)  | mph(A)      |
|             |              |                                                               |                     |                    |                                  |                  |             |
| kpneumoniae | MGH_69       | N                                                             | 1                   | CCBH_10892_plasmid | KF727591.2                       | IncFII(pKPX1)    | blaNDM-1    |
| kpneumoniae | MGH_69       | N                                                             | 2                   | pHg                | CP006662.1                       | IncR             | Qnr-B7      |
| kpneumoniae | MGH_69       | N                                                             | 2                   | pHg                | CP006662.1                       | IncR             | aac(6)-Ib   |
| kpneumoniae | MGH_69       | N                                                             | 2                   | pHg                | CP006662.1                       | IncR             | blaCTX-M-15 |
| kpneumoniae | MGH_69       | N                                                             | 2                   | pHg                | CP006662.1                       | IncR             | blaOXA-30   |
| kpneumoniae | MGH_69       | N                                                             | 2                   | pHg                | CP006662.1                       | IncR             | catA2       |
| kpneumoniae | MGH_69       | N                                                             | 2                   | pHg                | CP006662.1                       | IncR             | strA        |
| kpneumoniae | MGH_69       | N                                                             | 2                   | pHg                | CP006662.1                       | IncR             | strB        |
| kpneumoniae | MGH_69       | N                                                             | 2                   | pHg                | CP006662.1                       | IncR             | sul2        |
| kpneumoniae | MGH_69       | N                                                             | 3                   |                    |                                  | IncFIB(K)        | mph(A)      |
| kpneumoniae | MGH_69       | N                                                             | 3                   |                    |                                  | IncFIB(K)        | tet(A)      |
|             |              |                                                               |                     |                    |                                  |                  |             |
| ecoli       | UCI_66       | S                                                             | 1                   | pS1400_89          | JN796410.1                       | IncI1            | blaCMY-2    |
|             |              |                                                               |                     |                    |                                  |                  |             |
| ecloacae    | MGH_15       | N                                                             | 1                   | pEC-IMPQ           | EU855788.1                       | IncHI2A          | Qnr-B2      |
| ecloacae    | MGH_15       | N                                                             | 1                   | pEC-IMPQ           | EU855788.1                       | IncHI2A          | aac(6)Ib-cr |
| ecloacae    | MGH_15       | N                                                             | 1                   | pEC-IMPQ           | EU855788.1                       | IncHI2A          | aadA2       |
| ecloacae    | MGH_15       | N                                                             | 1                   | pEC-IMPQ           | EU855788.1                       | IncHI2A          | aph(3)-Ia   |
| ecloacae    | MGH_15       | N                                                             | 1                   | pEC-IMPQ           | EU855788.1                       | IncHI2A          | blaSHV-134  |
| ecloacae    | MGH_15       | N                                                             | 1                   | pEC-IMPQ           | EU855788.1                       | IncHI2A          | blaTEM-1    |
| ecloacae    | MGH_15       | N                                                             | 1                   | pEC-IMPQ           | EU855788.1                       | IncHI2A          | catA2       |
| ecloacae    | MGH_15       | N                                                             | 1                   | pEC-IMPQ           | EU855788.1                       | IncHI2A          | dfrA18      |
| ecloacae    | MGH_15       | N                                                             | 1                   | pEC-IMPQ           | EU855788.1                       | IncHI2A          | strB        |
| ecloacae    | MGH_15       | N                                                             | 1                   | pEC-IMPQ           | EU855788.1                       | IncHI2A          | sul1        |
| ecloacae    | MGH_15       | N                                                             | 1                   | pEC-IMPQ           | EU855788.1                       | IncHI2A          | sul2        |
| ecloacae    | MGH_15       | N                                                             | 2                   |                    |                                  | IncR             | aadA1       |
| ecloacae    | MGH_15       | N                                                             | 2                   |                    |                                  | IncR             | blaKPC-3    |
| ecloacae    | MGH_15       | N                                                             | 2                   |                    |                                  | IncR             | blaOXA-9    |
| ecloacae    | MGH_15       | N                                                             | 2                   |                    |                                  | IncR             | blaTEM-1    |
| ecloacae    | MGH_15       | N                                                             | 2                   |                    |                                  | IncR             | floR        |
| ecloacae    | MGH_15       | N                                                             | 2                   |                    |                                  | IncR             | sul1        |
| ecloacae    | MGH_15       | N                                                             | 2                   |                    |                                  | IncR             | tet(G)      |
|             |              |                                                               |                     |                    |                                  |                  |             |
| ecoli       | UCI_58       | S                                                             | 1                   |                    |                                  | IncP             | aac(3)-VIa  |
| ecoli       | UCI_58       | S                                                             | 1                   |                    |                                  | IncP             | aadA1       |
| ecoli       | UCI_58       | S                                                             | 1                   |                    |                                  | IncP             | blaCMY-2    |
| ecoli       | UCI_58       | S                                                             | 1                   |                    |                                  | IncP             | sul1        |
| ecoli       | UCI_58       | S                                                             | 1                   |                    |                                  | IncP             | tet(A)      |
|             |              |                                                               |                     |                    |                                  |                  |             |
| kpneumoniae | MGH_63       | N                                                             | 1                   |                    |                                  |                  | aac(6)-IIc  |
| kpneumoniae | MGH_63       | N                                                             | 1                   |                    |                                  |                  | ere(A)      |
| kpneumoniae | MGH_63       | N                                                             | 2                   |                    |                                  |                  | tet34       |
| kpneumoniae | MGH_63       | N                                                             | 3                   |                    |                                  |                  | tet(D)      |
| kpneumoniae | MGH_63       | N                                                             | 4                   |                    |                                  |                  | blaCTX-M-15 |
| kpneumoniae | MGH_63       | N                                                             | 5                   |                    |                                  |                  | floR        |
| kpneumoniae | MGH_63       | N                                                             | 5                   |                    |                                  |                  | sul2        |

| species     | isolate name | resistance phenotype<br>(N=NON-SUSCEPTIBLE;<br>S=SUSCEPTIBLE) | putative<br>plasmid | Best hit Genbank | Genbank accession<br>of best hit | plasmid replicon | gene name  |
|-------------|--------------|---------------------------------------------------------------|---------------------|------------------|----------------------------------|------------------|------------|
| kpneumoniae | MGH_63       | N                                                             | 6                   |                  |                                  |                  | Qnr-B4     |
| kpneumoniae | MGH_63       | N                                                             | 7                   |                  |                                  |                  | tet(A)     |
| kpneumoniae | MGH_29       | N                                                             | 1                   |                  |                                  | ColRNAI          | aac(6)-Ib  |
| kpneumoniae | MGH_29       | N                                                             | 2                   |                  |                                  | IncFIB(K)        | aac(3)-IVa |
| kpneumoniae | MGH_29       | N                                                             | 2                   |                  |                                  | IncFIB(K)        | aadA1      |
| kpneumoniae | MGH_29       | N                                                             | 2                   |                  |                                  | IncFIB(K)        | aadA2      |
| kpneumoniae | MGH_29       | N                                                             | 2                   |                  |                                  | IncFIB(K)        | aph(4)-Ia  |
| kpneumoniae | MGH_29       | N                                                             | 2                   |                  |                                  | IncFIB(K)        | blaKPC-2   |
| kpneumoniae | MGH_29       | N                                                             | 2                   |                  |                                  | IncFIB(K)        | cmIA1      |
| kpneumoniae | MGH_29       | N                                                             | 2                   |                  |                                  | IncFIB(K)        | mph(A)     |
| kpneumoniae | MGH_29       | N                                                             | 2                   |                  |                                  | IncFIB(K)        | sul3       |
| kpneumoniae | BWH_15       | I                                                             | 1                   | pBK31551         | JX193301.1                       | IncN             | aac(3)-Ib  |
| kpneumoniae | BWH_15       | I                                                             | 1                   | pBK31551         | JX193301.1                       | IncN             | aph(3)-Ia  |
| kpneumoniae | BWH_15       | I                                                             | 1                   | pBK31551         | JX193301.1                       | IncN             | blaKPC-4   |
| kpneumoniae | BWH_15       | I                                                             | 1                   | pBK31551         | JX193301.1                       | IncN             | blaTEM-1   |
| kpneumoniae | BWH_15       | I                                                             | 1                   | pBK31551         | JX193301.1                       | IncN             | sul1       |
| ecoli       | BIDMC_79     | S                                                             | 1                   |                  |                                  | Col156           | aadA5      |
| ecoli       | BIDMC_79     | S                                                             | 1                   |                  |                                  | Col156           | dfrA17     |
| ecoli       | BIDMC_79     | S                                                             | 1                   |                  |                                  | Col156           | mph(A)     |
| ecoli       | BIDMC_79     | S                                                             | 1                   |                  |                                  | Col156           | strA       |
| ecoli       | BIDMC_79     | S                                                             | 1                   |                  |                                  | Col156           | strB       |
| ecoli       | BIDMC_79     | S                                                             | 1                   |                  |                                  | Col156           | sul1       |
| ecoli       | BIDMC_79     | S                                                             | 1                   |                  |                                  | Col156           | sul2       |
| ecoli       | BIDMC_79     | S                                                             | 1                   |                  |                                  | Col156           | tet(A)     |
| ecoli       | BIDMC_79     | S                                                             | 2                   |                  |                                  | IncFII           | blaTEM-1   |
| kpneumoniae | UCI_37       | N                                                             | 1                   |                  |                                  | IncFIA(HI1)      | blaKPC-3   |
| kpneumoniae | UCI_37       | N                                                             | 2                   |                  |                                  |                  | aadA1      |
| kpneumoniae | UCI_37       | N                                                             | 2                   |                  |                                  |                  | blaOXA-9   |
| kpneumoniae | UCI_37       | N                                                             | 2                   |                  |                                  |                  | mph(A)     |
| kpneumoniae | UCI_37       | N                                                             | 2                   |                  |                                  |                  | strA       |
| kpneumoniae | UCI_37       | N                                                             | 2                   |                  |                                  |                  | strB       |
| kpneumoniae | UCI_37       | N                                                             | 2                   |                  |                                  |                  | sul2       |
| ecloacae    | BIDMC_8      | N                                                             | 1                   |                  |                                  |                  | Qnr-S1     |
| ecloacae    | BIDMC_8      | N                                                             | 1                   |                  |                                  |                  | blaKPC-3   |
| ecloacae    | BIDMC_8      | N                                                             | 2                   |                  |                                  | IncFII(pECLA)    | blaTEM-1   |
| ecloacae    | BIDMC_8      | N                                                             | 2                   |                  |                                  | IncFII(pECLA)    | catA2      |
| ecloacae    | BIDMC_8      | N                                                             | 2                   |                  |                                  | IncFII(pECLA)    | dfrA14     |
| ecloacae    | BIDMC_8      | N                                                             | 2                   |                  |                                  | IncFII(pECLA)    | strA       |
| ecloacae    | BIDMC_8      | N                                                             | 2                   |                  |                                  | IncFII(pECLA)    | strB       |
| ecloacae    | BIDMC_8      | N                                                             | 2                   |                  |                                  | IncFII(pECLA)    | sul2       |
| ecloacae    | BIDMC_8      | N                                                             | 2                   |                  |                                  | IncFII(pECLA)    | tet(D)     |
| ecloacae    | MGH_1        | N                                                             | 1                   |                  |                                  | IncN             | aac(6)-Ib  |
| ecloacae    | MGH_1        | N                                                             | 1                   |                  |                                  | IncN             | aadA1      |

| species     | isolate name | resistance phenotype<br>(N=NON-SUSCEPTIBLE;<br>S=SUSCEPTIBLE) | putative<br>plasmid | Best hit Genbank       | Genbank accession<br>of best hit | plasmid replicon | gene name  |
|-------------|--------------|---------------------------------------------------------------|---------------------|------------------------|----------------------------------|------------------|------------|
| ecloacae    | MGH_1        | N                                                             | 1                   |                        |                                  | IncN             | blaKPC-2   |
| ecloacae    | MGH_1        | N                                                             | 1                   |                        |                                  | IncN             | blaOXA-9   |
| ecloacae    | MGH_1        | N                                                             | 1                   |                        |                                  | IncN             | blaTEM-1   |
| ecloacae    | MGH_1        | N                                                             | 1                   |                        |                                  | IncN             | blaTEM-122 |
| ecloacae    | MGH_1        | N                                                             | 1                   |                        |                                  | IncN             | dfrA14     |
|             |              |                                                               |                     |                        |                                  |                  |            |
| kpneumoniae | BIDMC_13     | N                                                             | 1                   |                        |                                  |                  | aph(3)-Ia  |
| kpneumoniae | BIDMC_13     | N                                                             | 2                   | strain_JM45_plasmid_p1 | CP006657.1                       | IncR             | aac(3)-IVa |
| kpneumoniae | BIDMC_13     | N                                                             | 2                   | strain_JM45_plasmid_p1 | CP006657.1                       | IncR             | aadA1      |
| kpneumoniae | BIDMC_13     | N                                                             | 2                   | strain_JM45_plasmid_p1 | CP006657.1                       | IncFIB(K)        | aadA2      |
| kpneumoniae | BIDMC_13     | N                                                             | 2                   | strain_JM45_plasmid_p1 | CP006657.1                       | IncR             | aadA2      |
| kpneumoniae | BIDMC_13     | N                                                             | 2                   | strain_JM45_plasmid_p1 | CP006657.1                       | IncR             | aph(4)-Ia  |
| kpneumoniae | BIDMC_13     | N                                                             | 2                   | strain_JM45_plasmid_p1 | CP006657.1                       | IncR             | blaKPC-3   |
| kpneumoniae | BIDMC_13     | N                                                             | 2                   | strain_JM45_plasmid_p1 | CP006657.1                       | IncFIB(K)        | catA1      |
| kpneumoniae | BIDMC_13     | N                                                             | 2                   | strain_JM45_plasmid_p1 | CP006657.1                       | IncR             | cmlA1      |
| kpneumoniae | BIDMC_13     | N                                                             | 2                   | strain_JM45_plasmid_p1 | CP006657.1                       | IncFIB(K)        | dfrA12     |
| kpneumoniae | BIDMC_13     | N                                                             | 2                   | strain_JM45_plasmid_p1 | CP006657.1                       | IncFIB(K)        | mph(A)     |
| kpneumoniae | BIDMC_13     | N                                                             | 2                   | strain_JM45_plasmid_p1 | CP006657.1                       | IncFIB(K)        | sul1       |
| kpneumoniae | BIDMC_13     | N                                                             | 2                   | strain_JM45_plasmid_p1 | CP006657.1                       | IncR             | sul3       |
|             |              |                                                               |                     |                        |                                  |                  |            |
| kpneumoniae | BWH_47       | N                                                             | 1                   |                        |                                  |                  | aadA2      |
| kpneumoniae | BWH_47       | N                                                             | 1                   |                        |                                  |                  | catA1      |
| kpneumoniae | BWH_47       | N                                                             | 1                   |                        |                                  |                  | dfrA12     |
| kpneumoniae | BWH_47       | N                                                             | 1                   |                        |                                  |                  | mph(A)     |
| kpneumoniae | BWH_47       | N                                                             | 1                   |                        |                                  |                  | sul1       |
| kpneumoniae | BWH_47       | N                                                             | 2                   |                        |                                  | ColRNAI          | aac(6)-Ib  |
| kpneumoniae | BWH_47       | N                                                             | 2                   |                        |                                  | ColRNAI          | blaKPC-3   |
| kpneumoniae | BWH_47       | N                                                             | 2                   |                        |                                  | ColRNAI          | blaTEM-1   |
| kpneumoniae | BWH_47       | N                                                             | 3                   | pKpS90                 | JX461340.1                       | IncX3            | blaSHV-134 |
|             |              |                                                               |                     |                        |                                  |                  |            |
| ecoli       | BIDMC_74     | S                                                             | 1                   |                        |                                  | IncFIB(AP001918) | aadA1      |
| ecoli       | BIDMC_74     | S                                                             | 1                   |                        |                                  | IncFIB(AP001918) | aadA2      |
| ecoli       | BIDMC_74     | S                                                             | 1                   |                        |                                  | IncFIB(AP001918) | blaTEM-1   |
| ecoli       | BIDMC_74     | S                                                             | 1                   |                        |                                  | IncFIB(AP001918) | cmlA1      |
| ecoli       | BIDMC_74     | S                                                             | 1                   |                        |                                  | IncFIB(AP001918) | dfrA12     |
| ecoli       | BIDMC_74     | S                                                             | 1                   |                        |                                  | IncFIB(AP001918) | strA       |
| ecoli       | BIDMC_74     | S                                                             | 1                   |                        |                                  | IncFIB(AP001918) | strB       |
| ecoli       | BIDMC_74     | S                                                             | 1                   |                        |                                  | IncFIB(AP001918) | sul2       |
| ecoli       | BIDMC_74     | S                                                             | 1                   |                        |                                  | IncFIB(AP001918) | sul3       |
| ecoli       | BIDMC_74     | S                                                             | 1                   |                        |                                  | IncFIB(AP001918) | tet(A)     |
|             |              |                                                               |                     |                        |                                  |                  |            |
| kpneumoniae | BIDMC_7B     | N                                                             | 1                   |                        |                                  | IncFIB(K)        | catA1      |
| kpneumoniae | BIDMC_7B     | N                                                             | 2                   | pBK15692               | KC845573.1                       | IncI2            | blaTEM-1   |
|             |              |                                                               |                     |                        |                                  |                  |            |
| ecoli       | BIDMC_72     | S                                                             | 1                   |                        |                                  | IncFIB(AP001918) | aadA5      |
| ecoli       | BIDMC_72     | S                                                             | 1                   |                        |                                  | IncFIB(AP001918) | blaTEM-1   |
| ecoli       | BIDMC_72     | S                                                             | 1                   |                        |                                  | IncFIB(AP001918) | dfrA17     |
| ecoli       | BIDMC_72     | S                                                             | 1                   |                        |                                  | IncFIB(AP001918) | mph(A)     |
| ecoli       | BIDMC_72     | S                                                             | 1                   |                        |                                  | IncFIB(AP001918) | strA       |



| species     | isolate name | resistance phenotype<br>(N=NON-SUSCEPTIBLE;<br>S=SUSCEPTIBLE) | putative<br>plasmid | Best hit Genbank | Genbank accession<br>of best hit | plasmid replicon | gene name   |
|-------------|--------------|---------------------------------------------------------------|---------------------|------------------|----------------------------------|------------------|-------------|
| ecoli       | BIDMC_72     | S                                                             | 1                   |                  |                                  | IncFIB(AP001918) | strB        |
| ecoli       | BIDMC_72     | S                                                             | 1                   |                  |                                  | IncFIB(AP001918) | sul1        |
| ecoli       | BIDMC_72     | S                                                             | 1                   |                  |                                  | IncFIB(AP001918) | sul2        |
| ecoli       | BIDMC_72     | S                                                             | 1                   |                  |                                  | IncFIB(AP001918) | tet(A)      |
|             |              |                                                               |                     |                  |                                  |                  |             |
| ecloacae    | BWH_29       | S                                                             | 1                   |                  |                                  | IncR             | Qnr-S1      |
| ecloacae    | BWH_29       | S                                                             | 1                   |                  |                                  | IncR             | aadA2       |
| ecloacae    | BWH_29       | S                                                             | 1                   |                  |                                  | IncR             | dfrA12      |
| ecloacae    | BWH_29       | S                                                             | 1                   |                  |                                  | IncR             | floR        |
| ecloacae    | BWH_29       | S                                                             | 1                   |                  |                                  | IncR             | strA        |
| ecloacae    | BWH_29       | S                                                             | 1                   |                  |                                  | IncR             | strB        |
| ecloacae    | BWH_29       | S                                                             | 1                   |                  |                                  | IncR             | sul1        |
| ecloacae    | BWH_29       | S                                                             | 1                   |                  |                                  | IncR             | sul2        |
| ecloacae    | BWH_29       | S                                                             | 1                   |                  |                                  | IncR             | tet(A)      |
|             |              |                                                               |                     |                  |                                  |                  |             |
| ecloacae    | BIDMC_66     | N                                                             | 1                   | pK29             | EF382672.1                       |                  | blaKPC-4    |
| ecloacae    | BIDMC_66     | N                                                             | 1                   | pK29             | EF382672.1                       |                  | tet(B)      |
| ecloacae    | BIDMC_66     | N                                                             | 2                   |                  |                                  |                  | aadA2       |
| ecloacae    | BIDMC_66     | N                                                             | 2                   |                  |                                  |                  | aadB        |
| ecloacae    | BIDMC_66     | N                                                             | 2                   |                  |                                  |                  | blaACT-7    |
| ecloacae    | BIDMC_66     | N                                                             | 2                   |                  |                                  |                  | blaIMP-24   |
| ecloacae    | BIDMC_66     | N                                                             | 2                   |                  |                                  |                  | cmlA1       |
| ecloacae    | BIDMC_66     | N                                                             | 2                   |                  |                                  |                  | mph(A)      |
| ecloacae    | BIDMC_66     | N                                                             | 2                   |                  |                                  |                  | strB        |
| ecloacae    | BIDMC_66     | N                                                             | 2                   |                  |                                  |                  | sul1        |
|             |              |                                                               |                     |                  |                                  |                  |             |
| smarcesens  | BIDMC_80     | N                                                             | 1                   |                  |                                  |                  | tet34       |
| smarcesens  | BIDMC_80     | N                                                             | 2                   |                  |                                  |                  | arna        |
| smarcesens  | BIDMC_80     | N                                                             | 2                   |                  |                                  |                  | bcra        |
| smarcesens  | BIDMC_80     | N                                                             | 2                   |                  |                                  |                  | qnrB        |
| smarcesens  | BIDMC_80     | N                                                             | 3                   |                  |                                  |                  | ksga        |
| smarcesens  | BIDMC_80     | N                                                             | 4                   |                  |                                  |                  | bl1_sm      |
| smarcesens  | BIDMC_80     | N                                                             | 5                   |                  |                                  |                  | blaSME-2    |
| smarcesens  | BIDMC_80     | N                                                             | 6                   |                  |                                  |                  | aac(6)-Ic   |
| smarcesens  | BIDMC_80     | N                                                             | 6                   |                  |                                  |                  | baca        |
| smarcesens  | BIDMC_80     | N                                                             | 7                   |                  |                                  |                  | Qnr-S1      |
| smarcesens  | BIDMC_80     | N                                                             | 7                   |                  |                                  |                  | blaCTX-M-15 |
|             |              |                                                               |                     |                  |                                  |                  |             |
| kpneumoniae | MGH_70       | S                                                             | 1                   |                  |                                  |                  | blaTEM-1    |
| kpneumoniae | MGH_70       | S                                                             | 1                   |                  |                                  |                  | catA1       |
| kpneumoniae | MGH_70       | S                                                             | 1                   |                  |                                  |                  | strA        |
| kpneumoniae | MGH_70       | S                                                             | 1                   |                  |                                  |                  | strB        |
| kpneumoniae | MGH_70       | S                                                             | 1                   |                  |                                  |                  | sul2        |
| kpneumoniae | MGH_70       | S                                                             | 1                   |                  |                                  |                  | tet(D)      |
|             |              |                                                               |                     |                  |                                  |                  |             |
| ecloacae    | UCI_35       | N                                                             | 1                   |                  |                                  | IncFIA(HI1)      | dfrA22      |
| ecloacae    | UCI_35       | N                                                             | 1                   |                  |                                  | IncFIA(HI1)      | strA        |
| ecloacae    | UCI_35       | N                                                             | 1                   |                  |                                  | IncFIA(HI1)      | sul1        |
| ecloacae    | UCI_35       | N                                                             | 1                   |                  |                                  | IncFIA(HI1)      | tet(D)      |

| species     | isolate name | resistance phenotype<br>(N=NON-SUSCEPTIBLE;<br>S=SUSCEPTIBLE) | putative<br>plasmid | Best hit Genbank   | Genbank accession<br>of best hit | plasmid replicon | gene name   |
|-------------|--------------|---------------------------------------------------------------|---------------------|--------------------|----------------------------------|------------------|-------------|
| ecloacae    | BWH_27       | N                                                             | 1                   |                    |                                  | IncFIB(pHCM2)    | ARR-3       |
| ecloacae    | BWH_27       | N                                                             | 1                   |                    |                                  | IncFIB(pHCM2)    | aac(6)Ib-cr |
| ecloacae    | BWH_27       | N                                                             | 1                   |                    |                                  | IncFIB(pHCM2)    | aph(3)-Ia   |
| ecloacae    | BWH_27       | N                                                             | 1                   |                    |                                  | IncFIB(pHCM2)    | blaKPC-4    |
| ecloacae    | BWH_27       | N                                                             | 1                   |                    |                                  | IncFIB(pHCM2)    | blaOXA-30   |
| ecloacae    | BWH_27       | N                                                             | 1                   |                    |                                  | IncFIB(pHCM2)    | blaTEM-1    |
| ecloacae    | BWH_27       | N                                                             | 1                   |                    |                                  | IncFIB(pHCM2)    | catB3       |
| ecloacae    | BWH_27       | N                                                             | 1                   |                    |                                  | IncFIB(pHCM2)    | dfrA15      |
| ecloacae    | BWH_27       | N                                                             | 1                   |                    |                                  | IncFIB(pHCM2)    | sul1        |
| ecloacae    | BWH_27       | N                                                             | 2                   |                    |                                  |                  | Qnr-S1      |
| kpneumoniae | UCI_21       | N                                                             | 1                   | plasmid_9_strain_9 | FJ223607.1                       | IncN             | blaKPC-2    |
| kpneumoniae | UCI_21       | N                                                             | 2                   | pQ1-1              | HM371192.1                       |                  | strB        |
| kpneumoniae | UCI_21       | N                                                             | 2                   | pQ1-1              | HM371192.1                       |                  | sul2        |
| kpneumoniae | UCI_21       | N                                                             | 3                   |                    |                                  | ColRNAI          | aac(6)-Ib   |
| ecoli       | BIDMC_71     | S                                                             | 1                   | pRSB225            | JX127248.1                       | IncFIB(AP001918) | aac(6)Ib-cr |
| ecoli       | BIDMC_71     | S                                                             | 1                   | pRSB225            | JX127248.1                       | IncFIB(AP001918) | aadA5       |
| ecoli       | BIDMC_71     | S                                                             | 1                   | pRSB225            | JX127248.1                       | IncFIB(AP001918) | blaOXA-30   |
| ecoli       | BIDMC_71     | S                                                             | 1                   | pRSB225            | JX127248.1                       | IncFIB(AP001918) | blaTEM-1    |
| ecoli       | BIDMC_71     | S                                                             | 1                   | pRSB225            | JX127248.1                       | IncFIB(AP001918) | catA1       |
| ecoli       | BIDMC_71     | S                                                             | 1                   | pRSB225            | JX127248.1                       | IncFIB(AP001918) | catB3       |
| ecoli       | BIDMC_71     | S                                                             | 1                   | pRSB225            | JX127248.1                       | IncFIB(AP001918) | dfrA17      |
| ecoli       | BIDMC_71     | S                                                             | 1                   | pRSB225            | JX127248.1                       | IncFIB(AP001918) | erm(B)      |
| ecoli       | BIDMC_71     | S                                                             | 1                   | pRSB225            | JX127248.1                       | IncFIB(AP001918) | mph(A)      |
| ecoli       | BIDMC_71     | S                                                             | 1                   | pRSB225            | JX127248.1                       | IncFIB(AP001918) | strA        |
| ecoli       | BIDMC_71     | S                                                             | 1                   | pRSB225            | JX127248.1                       | IncFIB(AP001918) | strB        |
| ecoli       | BIDMC_71     | S                                                             | 1                   | pRSB225            | JX127248.1                       | IncFIB(AP001918) | sul1        |
| ecoli       | BIDMC_71     | S                                                             | 1                   | pRSB225            | JX127248.1                       | IncFIB(AP001918) | sul2        |
| ecoli       | BIDMC_71     | S                                                             | 1                   | pRSB225            | JX127248.1                       | IncFIB(AP001918) | tet(B)      |
| eaerogenes  | MGH_62       | S                                                             | 1                   |                    |                                  |                  | bacA        |
| eaerogenes  | MGH_62       | S                                                             | 2                   |                    |                                  |                  | CMY-48      |
| eaerogenes  | MGH_62       | S                                                             | 2                   |                    |                                  |                  | arna        |
| eaerogenes  | MGH_62       | S                                                             | 2                   |                    |                                  |                  | bcr         |
| eaerogenes  | MGH_62       | S                                                             | 2                   |                    |                                  |                  | bcra        |
| eaerogenes  | MGH_62       | S                                                             | 2                   |                    |                                  |                  | mdfa        |
| eaerogenes  | MGH_62       | S                                                             | 2                   |                    |                                  |                  | oqxB        |
| eaerogenes  | MGH_62       | S                                                             | 2                   |                    |                                  |                  | tet34       |
| eaerogenes  | MGH_62       | S                                                             | 3                   |                    |                                  |                  | fosA        |
| eaerogenes  | MGH_62       | S                                                             | 3                   |                    |                                  |                  | ksga        |
| kpneumoniae | BIDMC_2A     | N                                                             | 1                   |                    |                                  |                  | blaKPC-3    |
| kpneumoniae | BIDMC_2A     | N                                                             | 2                   | pNJST258C1         | CP006922.1                       | IncI2            | blaTEM-1    |
| ecoli       | BIDMC_38     | S                                                             | 1                   |                    |                                  | IncFIA           | aadA5       |
| ecoli       | BIDMC_38     | S                                                             | 1                   |                    |                                  | IncFIA           | blaTEM-1    |
| ecoli       | BIDMC_38     | S                                                             | 1                   |                    |                                  | IncFIA           | dfrA17      |

| species     | isolate name | resistance phenotype<br>(N=NON-SUSCEPTIBLE;<br>S=SUSCEPTIBLE) | putative<br>plasmid | Best hit Genbank | Genbank accession<br>of best hit | plasmid replicon | gene name   |
|-------------|--------------|---------------------------------------------------------------|---------------------|------------------|----------------------------------|------------------|-------------|
| ecoli       | BIDMC_38     | S                                                             | 1                   |                  |                                  | IncFIA           | mph(A)      |
| ecoli       | BIDMC_38     | S                                                             | 1                   |                  |                                  | IncFIA           | sul1        |
| ecoli       | BIDMC_38     | S                                                             | 1                   |                  |                                  | IncFIA           | tet(A)      |
|             |              |                                                               |                     |                  |                                  |                  |             |
| kpneumoniae | UCI_44       | S                                                             | 1                   |                  |                                  | IncX3            | mph(A)      |
| kpneumoniae | UCI_44       | S                                                             | 2                   |                  |                                  |                  | blaTEM-1    |
| kpneumoniae | UCI_44       | S                                                             | 2                   |                  |                                  |                  | strA        |
| kpneumoniae | UCI_44       | S                                                             | 2                   |                  |                                  |                  | strB        |
| kpneumoniae | UCI_44       | S                                                             | 2                   |                  |                                  |                  | sul2        |
| kpneumoniae | UCI_44       | S                                                             | 3                   |                  |                                  |                  | aadA1       |
| kpneumoniae | UCI_44       | S                                                             | 3                   |                  |                                  |                  | blaOXA-9    |
|             |              |                                                               |                     |                  |                                  |                  |             |
| eaerogenes  | MGH_61       | S                                                             | 1                   |                  |                                  |                  | CMY-48      |
| eaerogenes  | MGH_61       | S                                                             | 1                   |                  |                                  |                  | bcra        |
| eaerogenes  | MGH_61       | S                                                             | 1                   |                  |                                  |                  | tet34       |
| eaerogenes  | MGH_61       | S                                                             | 2                   |                  |                                  |                  | bcra        |
| eaerogenes  | MGH_61       | S                                                             | 2                   |                  |                                  |                  | fosA        |
| eaerogenes  | MGH_61       | S                                                             | 2                   |                  |                                  |                  | ksga        |
| eaerogenes  | MGH_61       | S                                                             | 3                   |                  |                                  |                  | baca        |
| eaerogenes  | MGH_61       | S                                                             | 3                   |                  |                                  |                  | bcr         |
| eaerogenes  | MGH_61       | S                                                             | 3                   |                  |                                  |                  | mdfa        |
| eaerogenes  | MGH_61       | S                                                             | 3                   |                  |                                  |                  | oqxB        |
| eaerogenes  | MGH_61       | S                                                             | 4                   |                  |                                  |                  | arna        |
|             |              |                                                               |                     |                  |                                  |                  |             |
| abaumanii   | BIDMC_56     | N                                                             | 1                   |                  |                                  |                  | aph3ia      |
| abaumanii   | BIDMC_56     | N                                                             | 1                   |                  |                                  |                  | strA        |
| abaumanii   | BIDMC_56     | N                                                             | 1                   |                  |                                  |                  | strB        |
| abaumanii   | BIDMC_56     | N                                                             | 1                   |                  |                                  |                  | tet(B)      |
| abaumanii   | BIDMC_56     | N                                                             | 2                   |                  |                                  |                  | aac(6)Ib-cr |
| abaumanii   | BIDMC_56     | N                                                             | 2                   |                  |                                  |                  | aadA1       |
| abaumanii   | BIDMC_56     | N                                                             | 2                   |                  |                                  |                  | armA        |
| abaumanii   | BIDMC_56     | N                                                             | 2                   |                  |                                  |                  | bcra        |
| abaumanii   | BIDMC_56     | N                                                             | 2                   |                  |                                  |                  | blaOXA-113  |
| abaumanii   | BIDMC_56     | N                                                             | 2                   |                  |                                  |                  | blaTEM-1    |
| abaumanii   | BIDMC_56     | N                                                             | 2                   |                  |                                  |                  | catB3       |
| abaumanii   | BIDMC_56     | N                                                             | 2                   |                  |                                  |                  | mph(E)      |
| abaumanii   | BIDMC_56     | N                                                             | 2                   |                  |                                  |                  | msr(E)      |
| abaumanii   | BIDMC_56     | N                                                             | 2                   |                  |                                  |                  | sul1        |
|             |              |                                                               |                     |                  |                                  |                  |             |
| ecloacae    | MGH_10       | N                                                             | 1                   |                  |                                  |                  | blaNDM-1    |
| ecloacae    | MGH_10       | N                                                             | 1                   |                  |                                  |                  | sul1        |
| ecloacae    | MGH_10       | N                                                             | 2                   |                  |                                  | IncR             | aac(3)-IId  |
| ecloacae    | MGH_10       | N                                                             | 2                   |                  |                                  | IncR             | aac(6)-Ib   |
| ecloacae    | MGH_10       | N                                                             | 2                   |                  |                                  | IncR             | aac(6)Ib-cr |
| ecloacae    | MGH_10       | N                                                             | 2                   |                  |                                  | IncR             | aadA1       |
| ecloacae    | MGH_10       | N                                                             | 2                   |                  |                                  | IncR             | aadA2       |
| ecloacae    | MGH_10       | N                                                             | 2                   |                  |                                  | IncR             | armA        |
| ecloacae    | MGH_10       | N                                                             | 2                   |                  |                                  | IncR             | blaCTX-M-15 |
| ecloacae    | MGH_10       | N                                                             | 2                   |                  |                                  | IncR             | blaOXA-30   |

| species     | isolate name | resistance phenotype<br>(N=NON-SUSCEPTIBLE;<br>S=SUSCEPTIBLE) | putative<br>plasmid | Best hit Genbank | Genbank accession<br>of best hit | plasmid replicon | gene name   |
|-------------|--------------|---------------------------------------------------------------|---------------------|------------------|----------------------------------|------------------|-------------|
| ecloacae    | MGH_10       | N                                                             | 2                   |                  |                                  | IncR             | blaOXA-9    |
| ecloacae    | MGH_10       | N                                                             | 2                   |                  |                                  | IncR             | blaTEM-1    |
| ecloacae    | MGH_10       | N                                                             | 2                   |                  |                                  | IncR             | dfrA12      |
| ecloacae    | MGH_10       | N                                                             | 2                   |                  |                                  | IncR             | mph(E)      |
| ecloacae    | MGH_10       | N                                                             | 2                   |                  |                                  | IncR             | msr(E)      |
| ecloacae    | MGH_10       | N                                                             | 2                   |                  |                                  | IncR             | sul1        |
| ecloacae    | MGH_10       | N                                                             | 3                   |                  |                                  |                  | Qnr-S1      |
|             |              |                                                               |                     |                  |                                  |                  |             |
| ecoli       | BIDMC_15     | N                                                             | 1                   |                  |                                  | IncN             | blaTEM-1    |
| ecoli       | BIDMC_15     | N                                                             | 1                   |                  |                                  | IncN             | dfrA14      |
| ecoli       | BIDMC_15     | N                                                             | 2                   |                  |                                  |                  | mph(A)      |
| ecoli       | BIDMC_15     | N                                                             | 3                   | pEC-IMP          | EU855787.1                       | IncHI2A          | aac(6)-IIc  |
| ecoli       | BIDMC_15     | N                                                             | 3                   | pEC-IMP          | EU855787.1                       | IncHI2A          | blaKPC-2    |
| ecoli       | BIDMC_15     | N                                                             | 3                   | pEC-IMP          | EU855787.1                       | IncHI2A          | ere(A)      |
| ecoli       | BIDMC_15     | N                                                             | 3                   | pEC-IMP          | EU855787.1                       | IncHI2A          | sul1        |
| ecoli       | BIDMC_15     | N                                                             | 3                   | pEC-IMP          | EU855787.1                       | IncHI2A          | sul2        |
|             |              |                                                               |                     |                  |                                  |                  |             |
| koxytoca    | MGH_27       | N                                                             | 1                   |                  |                                  | IncN             | aac(6)-Ib   |
| koxytoca    | MGH_27       | N                                                             | 1                   |                  |                                  | IncN             | aadA1       |
| koxytoca    | MGH_27       | N                                                             | 1                   |                  |                                  | IncN             | blaKPC-3    |
| koxytoca    | MGH_27       | N                                                             | 1                   |                  |                                  | IncN             | blaOXA-9    |
| koxytoca    | MGH_27       | N                                                             | 1                   |                  |                                  | IncN             | blaTEM-1    |
| koxytoca    | MGH_27       | N                                                             | 1                   |                  |                                  | IncN             | dfrA14      |
| koxytoca    | MGH_27       | N                                                             | 1                   |                  |                                  | IncN             | strA        |
| koxytoca    | MGH_27       | N                                                             | 1                   |                  |                                  | IncN             | strB        |
| koxytoca    | MGH_27       | N                                                             | 1                   |                  |                                  | IncN             | sul2        |
|             |              |                                                               |                     |                  |                                  |                  |             |
| kpneumoniae | MGH_35       | I                                                             | 1                   | pKPX-2           | AP012056.1                       | IncFIA(HI1)      | Qnr-B17     |
| kpneumoniae | MGH_35       | I                                                             | 1                   | pKPX-2           | AP012056.1                       | IncFIA(HI1)      | aac(3)-IIa  |
| kpneumoniae | MGH_35       | I                                                             | 1                   | pKPX-2           | AP012056.1                       | IncFIA(HI1)      | aac(6)Ib-cr |
| kpneumoniae | MGH_35       | I                                                             | 1                   | pKPX-2           | AP012056.1                       | IncFIA(HI1)      | blaCTX-M-15 |
| kpneumoniae | MGH_35       | I                                                             | 1                   | pKPX-2           | AP012056.1                       | IncFIA(HI1)      | blaOXA-30   |
| kpneumoniae | MGH_35       | I                                                             | 1                   | pKPX-2           | AP012056.1                       | IncFIA(HI1)      | blaTEM-1    |
| kpneumoniae | MGH_35       | I                                                             | 1                   | pKPX-2           | AP012056.1                       | IncFIA(HI1)      | strA        |
| kpneumoniae | MGH_35       | I                                                             | 1                   | pKPX-2           | AP012056.1                       | IncFIA(HI1)      | strB        |
| kpneumoniae | MGH_35       | I                                                             | 1                   | pKPX-2           | AP012056.1                       | IncFIA(HI1)      | sul2        |
| kpneumoniae | MGH_35       | I                                                             | 1                   | pKPX-2           | AP012056.1                       | IncFIA(HI1)      | tet(A)      |
|             |              |                                                               |                     |                  |                                  |                  |             |
| kpneumoniae | BIDMC_51     | S                                                             | 1                   |                  |                                  | IncR             | blaTEM-1    |
| kpneumoniae | BIDMC_51     | S                                                             | 1                   |                  |                                  | IncR             | dfrA26      |
| kpneumoniae | BIDMC_51     | S                                                             | 1                   |                  |                                  | IncR             | sul2        |
|             |              |                                                               |                     |                  |                                  |                  |             |
| kpneumoniae | BWH_41       | S                                                             | 1                   |                  |                                  | IncFIB(K)        | aadA2       |
| kpneumoniae | BWH_41       | S                                                             | 1                   |                  |                                  | IncFIB(K)        | aph(3)-Ia   |
| kpneumoniae | BWH_41       | S                                                             | 1                   |                  |                                  | IncFIB(K)        | catA1       |
| kpneumoniae | BWH_41       | S                                                             | 1                   |                  |                                  | IncFIB(K)        | dfrA12      |
| kpneumoniae | BWH_41       | S                                                             | 1                   |                  |                                  | IncFIB(K)        | mph(A)      |
| kpneumoniae | BWH_41       | S                                                             | 1                   |                  |                                  | IncFIB(K)        | sul1        |
|             |              |                                                               |                     |                  |                                  |                  |             |

| species     | isolate name | resistance phenotype<br>(N=NON-SUSCEPTIBLE;<br>S=SUSCEPTIBLE) | putative<br>plasmid | Best hit Genbank | Genbank accession<br>of best hit | plasmid replicon | gene name   |
|-------------|--------------|---------------------------------------------------------------|---------------------|------------------|----------------------------------|------------------|-------------|
| kpneumoniae | BIDMC_60     | N                                                             | 1                   |                  |                                  |                  | aadA2       |
| kpneumoniae | BIDMC_60     | N                                                             | 1                   |                  |                                  |                  | aph(3)-Ia   |
| kpneumoniae | BIDMC_60     | N                                                             | 1                   |                  |                                  |                  | catA1       |
| kpneumoniae | BIDMC_60     | N                                                             | 1                   |                  |                                  |                  | dfrA12      |
| kpneumoniae | BIDMC_60     | N                                                             | 1                   |                  |                                  |                  | mph(A)      |
| kpneumoniae | BIDMC_60     | N                                                             | 1                   |                  |                                  |                  | sul1        |
| kpneumoniae | BIDMC_60     | N                                                             | 2                   | pAAC154          | JF828150.1                       | ColRNAI          | aac(6)-Ib   |
| kpneumoniae | BIDMC_60     | N                                                             | 3                   |                  |                                  | IncFIB(pQil)     | blaKPC-2    |
| kpneumoniae | BIDMC_60     | N                                                             | 3                   |                  |                                  | IncFIB(pQil)     | blaTEM-1    |
|             |              |                                                               |                     |                  |                                  |                  |             |
| kpneumoniae | MGH_65       | N                                                             | 1                   |                  |                                  | IncHI1B          | ARR-2       |
| kpneumoniae | MGH_65       | N                                                             | 1                   |                  |                                  | IncHI1B          | aac(6)-IIc  |
| kpneumoniae | MGH_65       | N                                                             | 1                   |                  |                                  | IncHI1B          | aadA1       |
| kpneumoniae | MGH_65       | N                                                             | 1                   |                  |                                  | IncHI1B          | blaOXA-10   |
| kpneumoniae | MGH_65       | N                                                             | 1                   |                  |                                  | IncHI1B          | cmlA1       |
| kpneumoniae | MGH_65       | N                                                             | 1                   |                  |                                  | IncHI1B          | ere(A)      |
| kpneumoniae | MGH_65       | N                                                             | 1                   |                  |                                  | IncHI1B          | floR        |
| kpneumoniae | MGH_65       | N                                                             | 1                   |                  |                                  | IncHI1B          | sul1        |
| kpneumoniae | MGH_65       | N                                                             | 1                   |                  |                                  | IncHI1B          | sul2        |
| kpneumoniae | MGH_65       | N                                                             | 1                   |                  |                                  | IncHI1B          | tet(A)      |
| kpneumoniae | MGH_65       | N                                                             | 2                   |                  |                                  |                  | blaSHV-134  |
| kpneumoniae | MGH_65       | N                                                             | 2                   |                  |                                  |                  | tet(D)      |
| kpneumoniae | MGH_65       | N                                                             | 3                   |                  |                                  |                  | Qnr-B4      |
|             |              |                                                               |                     |                  |                                  |                  |             |
| kpneumoniae | MGH_39       | N                                                             | 1                   |                  |                                  |                  | aac(6)-Ib   |
| kpneumoniae | MGH_39       | N                                                             | 1                   |                  |                                  |                  | aadA1       |
| kpneumoniae | MGH_39       | N                                                             | 1                   |                  |                                  |                  | blaKPC-3    |
| kpneumoniae | MGH_39       | N                                                             | 1                   |                  |                                  |                  | blaOXA-9    |
| kpneumoniae | MGH_39       | N                                                             | 1                   |                  |                                  |                  | blaTEM-1    |
|             |              |                                                               |                     |                  |                                  |                  |             |
| ecloacae    | MGH_53       | S                                                             | 1                   |                  |                                  |                  | aac(6)-Ib   |
|             |              |                                                               |                     |                  |                                  |                  |             |
| ecloacae    | MGH_2        | N                                                             | 1                   |                  |                                  | IncA/C           | ARR-3       |
| ecloacae    | MGH_2        | N                                                             | 1                   |                  |                                  | IncA/C           | aac(3)-VIa  |
| ecloacae    | MGH_2        | N                                                             | 1                   |                  |                                  | IncA/C           | aac(6)Ib-cr |
| ecloacae    | MGH_2        | N                                                             | 1                   |                  |                                  | IncA/C           | aadA1       |
| ecloacae    | MGH_2        | N                                                             | 1                   |                  |                                  | IncA/C           | aph(3)-Ia   |
| ecloacae    | MGH_2        | N                                                             | 1                   |                  |                                  | IncA/C           | blaKPC-4    |
| ecloacae    | MGH_2        | N                                                             | 1                   |                  |                                  | IncA/C           | blaOXA-30   |
| ecloacae    | MGH_2        | N                                                             | 1                   |                  |                                  | IncA/C           | blaTEM-1    |
| ecloacae    | MGH_2        | N                                                             | 1                   |                  |                                  | IncA/C           | catB3       |
| ecloacae    | MGH_2        | N                                                             | 1                   |                  |                                  | IncA/C           | mph(A)      |
| ecloacae    | MGH_2        | N                                                             | 1                   |                  |                                  | IncA/C           | sul1        |
| ecloacae    | MGH_2        | N                                                             | 2                   | pHCM2            | AL513384.1                       | IncFIB(pHCM2)    | sul1        |
| ecloacae    | MGH_2        | N                                                             | 3                   |                  |                                  |                  | Qnr-S1      |
|             |              |                                                               |                     |                  |                                  |                  |             |
| kpneumoniae | UCI_25       | N                                                             | 1                   |                  |                                  | IncFIB(K)        | strA        |
| kpneumoniae | UCI_25       | N                                                             | 1                   |                  |                                  | IncFIB(K)        | strB        |
| kpneumoniae | UCI_25       | N                                                             | 1                   |                  |                                  | IncFIB(K)        | sul2        |

| species     | isolate name | resistance phenotype<br>(N=NON-SUSCEPTIBLE;<br>S=SUSCEPTIBLE) | putative<br>plasmid | Best hit Genbank | Genbank accession<br>of best hit | plasmid replicon | gene name  |
|-------------|--------------|---------------------------------------------------------------|---------------------|------------------|----------------------------------|------------------|------------|
| kpneumoniae | UCI_25       | N                                                             | 1                   |                  |                                  | IncFIB(K)        | tet(D)     |
| ecoli       | BWH_34       | N                                                             | 1                   | pEK499           | EU935739.1                       | IncFIA           | aadA5      |
| ecoli       | BWH_34       | N                                                             | 1                   | pEK499           | EU935739.1                       | IncFIA           | blaKPC-3   |
| ecoli       | BWH_34       | N                                                             | 1                   | pEK499           | EU935739.1                       | IncFIA           | dfrA17     |
| ecoli       | BWH_34       | N                                                             | 1                   | pEK499           | EU935739.1                       | IncFIA           | strA       |
| ecoli       | BWH_34       | N                                                             | 1                   | pEK499           | EU935739.1                       | IncFIA           | strB       |
| ecoli       | BWH_34       | N                                                             | 1                   | pEK499           | EU935739.1                       | IncFIA           | sul1       |
| ecoli       | BWH_34       | N                                                             | 1                   | pEK499           | EU935739.1                       | IncFIA           | sul2       |
| ecoli       | BWH_34       | N                                                             | 1                   | pEK499           | EU935739.1                       | IncFIA           | tet(A)     |
| ecloacae    | MGH_13       | N                                                             | 1                   |                  |                                  |                  | aac(6)-Ib  |
| ecloacae    | MGH_13       | N                                                             | 1                   |                  |                                  |                  | aadA1      |
| ecloacae    | MGH_13       | N                                                             | 1                   |                  |                                  |                  | blaKPC-3   |
| ecloacae    | MGH_13       | N                                                             | 1                   |                  |                                  |                  | blaOXA-9   |
| ecloacae    | MGH_13       | N                                                             | 1                   |                  |                                  |                  | blaTEM-1   |
| kpneumoniae | BIDMC_12A    | N                                                             | 1                   | pBK30683         | KF954760.1                       | IncFIA(HI1)      | blaKPC-3   |
| kpneumoniae | BIDMC_12A    | N                                                             | 1                   | pBK30683         | KF954760.1                       | IncFIA(HI1)      | blaTEM-1   |
| kpneumoniae | BIDMC_12A    | N                                                             | 1                   | pBK30683         | KF954760.1                       | IncFIA(HI1)      | strA       |
| kpneumoniae | BIDMC_12A    | N                                                             | 1                   | pBK30683         | KF954760.1                       | IncFIA(HI1)      | strB       |
| kpneumoniae | BIDMC_12A    | N                                                             | 1                   | pBK30683         | KF954760.1                       | IncFIA(HI1)      | sul2       |
| kpneumoniae | UCI_14       | S                                                             | 1                   |                  |                                  | IncFIA(HI1)      | catA2      |
| kpneumoniae | UCI_14       | S                                                             | 1                   |                  |                                  | IncFIA(HI1)      | strA       |
| kpneumoniae | UCI_14       | S                                                             | 1                   |                  |                                  | IncFIA(HI1)      | strB       |
| kpneumoniae | UCI_14       | S                                                             | 1                   |                  |                                  | IncFIA(HI1)      | sul2       |
| kpneumoniae | UCI_14       | S                                                             | 2                   |                  |                                  |                  | aac(6)-Ib  |
| ecoli       | BIDMC_43B    | N                                                             | 1                   | pEC-IMP          | EU855787.1                       | IncHI2A          | aac(6)-IIc |
| ecoli       | BIDMC_43B    | N                                                             | 1                   | pEC-IMP          | EU855787.1                       | IncHI2A          | blaKPC-2   |
| ecoli       | BIDMC_43B    | N                                                             | 1                   | pEC-IMP          | EU855787.1                       | IncHI2A          | blaSHV-134 |
| ecoli       | BIDMC_43B    | N                                                             | 1                   | pEC-IMP          | EU855787.1                       | IncHI2A          | ere(A)     |
| ecoli       | BIDMC_43B    | N                                                             | 1                   | pEC-IMP          | EU855787.1                       | IncHI2A          | sul1       |
| ecoli       | BIDMC_43B    | N                                                             | 1                   | pEC-IMP          | EU855787.1                       | IncHI2A          | sul2       |
| kpneumoniae | UCI_61       | N                                                             | 1                   |                  |                                  |                  | blaKPC-2   |
| kpneumoniae | UCI_61       | N                                                             | 2                   |                  |                                  |                  | aadA2      |
| kpneumoniae | UCI_61       | N                                                             | 2                   |                  |                                  |                  | dfrA12     |
| kpneumoniae | UCI_61       | N                                                             | 2                   |                  |                                  |                  | mph(A)     |
| kpneumoniae | UCI_61       | N                                                             | 2                   |                  |                                  |                  | sul1       |
| ecoli       | BIDMC_64     | N                                                             | 1                   | pEK499           | EU935739.1                       | IncFIA           | aadA5      |
| ecoli       | BIDMC_64     | N                                                             | 1                   | pEK499           | EU935739.1                       | IncFIA           | blaKPC-3   |
| ecoli       | BIDMC_64     | N                                                             | 1                   | pEK499           | EU935739.1                       | IncFIA           | dfrA17     |
| ecoli       | BIDMC_64     | N                                                             | 1                   | pEK499           | EU935739.1                       | IncFIA           | strA       |
| ecoli       | BIDMC_64     | N                                                             | 1                   | pEK499           | EU935739.1                       | IncFIA           | strB       |
| ecoli       | BIDMC_64     | N                                                             | 1                   | pEK499           | EU935739.1                       | IncFIA           | sul1       |
| ecoli       | BIDMC_64     | N                                                             | 1                   | pEK499           | EU935739.1                       | IncFIA           | sul2       |

| species     | isolate name | resistance phenotype<br>(N=NON-SUSCEPTIBLE;<br>S=SUSCEPTIBLE) | putative<br>plasmid | Best hit Genbank       | Genbank accession<br>of best hit | plasmid replicon | gene name  |
|-------------|--------------|---------------------------------------------------------------|---------------------|------------------------|----------------------------------|------------------|------------|
| ecoli       | BIDMC_64     | N                                                             | 1                   | pEK499                 | EU935739.1                       | IncFIA           | tet(A)     |
| kpneumoniae | BIDMC_32     | N                                                             | 1                   |                        |                                  | IncFIB(K)        | catA1      |
| kpneumoniae | BIDMC_32     | N                                                             | 2                   |                        |                                  |                  | aac(3)-IVa |
| kpneumoniae | BIDMC_32     | N                                                             | 2                   |                        |                                  |                  | aadA1      |
| kpneumoniae | BIDMC_32     | N                                                             | 2                   |                        |                                  |                  | aadA2      |
| kpneumoniae | BIDMC_32     | N                                                             | 2                   |                        |                                  |                  | aph(4)-Ia  |
| kpneumoniae | BIDMC_32     | N                                                             | 2                   |                        |                                  |                  | cmlA1      |
| kpneumoniae | BIDMC_32     | N                                                             | 2                   |                        |                                  |                  | sul3       |
| kpneumoniae | BIDMC_32     | N                                                             | 3                   |                        |                                  |                  | blaKPC-3   |
| kpneumoniae | BIDMC_32     | N                                                             | 4                   |                        |                                  |                  | Qnr-S1     |
| kpneumoniae | BIDMC_7A     | N                                                             | 1                   |                        |                                  |                  | catA1      |
| kpneumoniae | BIDMC_7A     | N                                                             | 2                   |                        |                                  | IncI2            | blaTEM-1   |
| kpneumoniae | BIDMC_46A    | I                                                             | 1                   |                        |                                  | IncFIB(K)        | aadA2      |
| kpneumoniae | BIDMC_46A    | I                                                             | 1                   |                        |                                  | IncFIB(K)        | aadB       |
| kpneumoniae | BIDMC_46A    | I                                                             | 1                   |                        |                                  | IncFIB(K)        | catB3      |
| kpneumoniae | BIDMC_46A    | I                                                             | 1                   |                        |                                  | IncFIB(K)        | dfrA18     |
| kpneumoniae | BIDMC_46A    | I                                                             | 1                   |                        |                                  | IncFIB(K)        | sul1       |
| kpneumoniae | BIDMC_46A    | I                                                             | 2                   |                        |                                  | IncFIB(pQil)     | blaSHV-134 |
| kpneumoniae | BIDMC_46A    | I                                                             | 2                   |                        |                                  | IncFIB(pQil)     | blaTEM-1   |
| ecoli       | BIDMC_19A    | N                                                             | 1                   |                        |                                  |                  | blaKPC-2   |
| ecoli       | BIDMC_19A    | N                                                             | 2                   | pEC-IMP                | EU855787.1                       | IncHI2A          | aac(6)-IIc |
| ecoli       | BIDMC_19A    | N                                                             | 2                   | pEC-IMP                | EU855787.1                       | IncHI2A          | blaKPC-2   |
| ecoli       | BIDMC_19A    | N                                                             | 2                   | pEC-IMP                | EU855787.1                       | IncHI2A          | blaSHV-134 |
| ecoli       | BIDMC_19A    | N                                                             | 2                   | pEC-IMP                | EU855787.1                       | IncHI2A          | ere(A)     |
| ecoli       | BIDMC_19A    | N                                                             | 2                   | pEC-IMP                | EU855787.1                       | IncHI2A          | sul1       |
| ecoli       | BIDMC_19A    | N                                                             | 2                   | pEC-IMP                | EU855787.1                       | IncHI2A          | sul2       |
| ecoli       | BIDMC_19A    | N                                                             | 3                   |                        |                                  |                  | blaKPC-2   |
| ecoli       | BIDMC_19A    | N                                                             | 3                   |                        |                                  |                  | blaTEM-1   |
| ecoli       | BIDMC_19A    | N                                                             | 3                   |                        |                                  |                  | dfrA14     |
| ecoli       | BIDMC_19A    | N                                                             | 3                   |                        |                                  |                  | mph(A)     |
| kpneumoniae | MGH_60       | S                                                             | 1                   |                        |                                  | IncFIB(K)        | tet(D)     |
| kpneumoniae | MGH_60       | S                                                             | 2                   |                        |                                  |                  | sul1       |
| kpneumoniae | BIDMC_18B    | I                                                             | 1                   |                        |                                  |                  | aac(6)-Ib  |
| kpneumoniae | BIDMC_18B    | I                                                             | 2                   |                        |                                  | IncR             | aac(3)-IVa |
| kpneumoniae | BIDMC_18B    | I                                                             | 2                   |                        |                                  | IncR             | aadA1      |
| kpneumoniae | BIDMC_18B    | I                                                             | 2                   |                        |                                  | IncR             | aadA2      |
| kpneumoniae | BIDMC_18B    | I                                                             | 2                   |                        |                                  | IncR             | aph(4)-Ia  |
| kpneumoniae | BIDMC_18B    | I                                                             | 2                   |                        |                                  | IncR             | blaKPC-2   |
| kpneumoniae | BIDMC_18B    | I                                                             | 2                   |                        |                                  | IncR             | cmlA1      |
| kpneumoniae | BIDMC_18B    | I                                                             | 2                   |                        |                                  | IncR             | sul3       |
| kpneumoniae | BIDMC_18B    | I                                                             | 3                   | pKpS90                 | JX461340.1                       | IncX3            | aac(6)-Ib  |
| kpneumoniae | BIDMC_18B    | I                                                             | 3                   | pKpS90                 | JX461340.1                       | IncX3            | blaSHV-134 |
| kpneumoniae | BIDMC_18B    | I                                                             | 4                   | strain_JM45_plasmid_p1 | CP006657.1                       | IncFIB(K)        | aadA2      |





| species     | isolate name | resistance phenotype<br>(N=NON-SUSCEPTIBLE;<br>S=SUSCEPTIBLE) | putative<br>plasmid | Best hit Genbank       | Genbank accession<br>of best hit | plasmid replicon | gene name  |
|-------------|--------------|---------------------------------------------------------------|---------------------|------------------------|----------------------------------|------------------|------------|
| kpneumoniae | BIDMC_12C    | N                                                             | 1                   | pBK30683               | KF954760.1                       | IncFII(p14)      | blaKPC-3   |
| kpneumoniae | BIDMC_12C    | N                                                             | 1                   | pBK30683               | KF954760.1                       | IncFII(p14)      | blaTEM-1   |
| kpneumoniae | BIDMC_12C    | N                                                             | 1                   | pBK30683               | KF954760.1                       | IncFII(p14)      | strA       |
| kpneumoniae | BIDMC_12C    | N                                                             | 1                   | pBK30683               | KF954760.1                       | IncFII(p14)      | strB       |
| kpneumoniae | BIDMC_12C    | N                                                             | 1                   | pBK30683               | KF954760.1                       | IncFII(p14)      | sul2       |
|             |              |                                                               |                     |                        |                                  |                  |            |
| kpneumoniae | UCI_55       | N                                                             | 1                   |                        |                                  |                  | aph(3)-Ia  |
| kpneumoniae | UCI_55       | N                                                             | 2                   | pKpS90                 | JX461340.1                       | IncX3            | blaSHV-134 |
| kpneumoniae | UCI_55       | N                                                             | 3                   |                        |                                  |                  | aac(6)-Ib  |
| kpneumoniae | UCI_55       | N                                                             | 3                   |                        |                                  |                  | aadA1      |
| kpneumoniae | UCI_55       | N                                                             | 3                   |                        |                                  |                  | blaOXA-9   |
| kpneumoniae | UCI_55       | N                                                             | 4                   |                        |                                  |                  | blaTEM-1   |
| kpneumoniae | UCI_55       | N                                                             | 4                   |                        |                                  |                  | strA       |
| kpneumoniae | UCI_55       | N                                                             | 4                   |                        |                                  |                  | strB       |
| kpneumoniae | UCI_55       | N                                                             | 4                   |                        |                                  |                  | sul2       |
| kpneumoniae | UCI_55       | N                                                             | 5                   |                        |                                  |                  | blaKPC-3   |
| kpneumoniae | UCI_55       | N                                                             | 6                   | pNJST258C1             | CP006922.1                       | IncFII(p14)      | mph(A)     |
|             |              |                                                               |                     |                        |                                  |                  |            |
| kpneumoniae | BIDMC_1      | N                                                             | 1                   | pNE1280                | JQ837276.1                       | IncL/M(pMU407)   | Qnr-S1     |
| kpneumoniae | BIDMC_1      | N                                                             | 2                   | pKpS90                 | JX461340.1                       |                  | blaKPC-3   |
| kpneumoniae | BIDMC_1      | N                                                             | 3                   | strain_JM45_plasmid_p1 | CP006657.1                       | IncFIB(K)        | aadA2      |
| kpneumoniae | BIDMC_1      | N                                                             | 3                   | strain_JM45_plasmid_p1 | CP006657.1                       | IncFIB(K)        | aph(3)-Ia  |
| kpneumoniae | BIDMC_1      | N                                                             | 3                   | strain_JM45_plasmid_p1 | CP006657.1                       | IncFIB(K)        | catA1      |
| kpneumoniae | BIDMC_1      | N                                                             | 3                   | strain_JM45_plasmid_p1 | CP006657.1                       | IncFIB(K)        | dfrA12     |
| kpneumoniae | BIDMC_1      | N                                                             | 3                   | strain_JM45_plasmid_p1 | CP006657.1                       | IncFIB(K)        | mph(A)     |
| kpneumoniae | BIDMC_1      | N                                                             | 3                   | strain_JM45_plasmid_p1 | CP006657.1                       | IncFIB(K)        | sul1       |
|             |              |                                                               |                     |                        |                                  |                  |            |
| ecoli       | BIDMC_9      | N                                                             | 1                   |                        |                                  |                  | blaKPC-2   |
| ecoli       | BIDMC_9      | N                                                             | 2                   |                        |                                  | IncN             | blaTEM-1   |
| ecoli       | BIDMC_9      | N                                                             | 2                   |                        |                                  | IncN             | dfrA14     |
| ecoli       | BIDMC_9      | N                                                             | 2                   |                        |                                  | IncN             | mph(A)     |
| ecoli       | BIDMC_9      | N                                                             | 3                   | pEC-IMP                | EU855787.1                       | IncHI2A          | aac(6)-IIc |
| ecoli       | BIDMC_9      | N                                                             | 3                   | pEC-IMP                | EU855787.1                       | IncHI2A          | blaSHV-134 |
| ecoli       | BIDMC_9      | N                                                             | 3                   | pEC-IMP                | EU855787.1                       | IncHI2A          | ere(A)     |
| ecoli       | BIDMC_9      | N                                                             | 3                   | pEC-IMP                | EU855787.1                       | IncHI2A          | sul1       |
| ecoli       | BIDMC_9      | N                                                             | 3                   | pEC-IMP                | EU855787.1                       | IncHI2A          | sul2       |
|             |              |                                                               |                     |                        |                                  |                  |            |
| kpneumoniae | UCI_43       | S                                                             | 1                   |                        |                                  |                  | blaSHV-134 |
| kpneumoniae | UCI_43       | S                                                             | 1                   |                        |                                  |                  | mph(A)     |
| kpneumoniae | UCI_43       | S                                                             | 2                   | pNJST258C1             | CP006922.1                       |                  | aac(6)-Ib  |
| kpneumoniae | UCI_43       | S                                                             | 2                   | pNJST258C1             | CP006922.1                       |                  | aadA1      |
| kpneumoniae | UCI_43       | S                                                             | 2                   | pNJST258C1             | CP006922.1                       |                  | blaOXA-9   |
|             |              |                                                               |                     |                        |                                  |                  |            |
| kpneumoniae | UCI_1        | N                                                             | 1                   | pNJST258N3             | CP006925.1                       |                  | aac(6)-Ib  |
| kpneumoniae | UCI_1        | N                                                             | 2                   |                        |                                  | IncFIB(K)        | blaKPC-3   |
| kpneumoniae | UCI_1        | N                                                             | 2                   |                        |                                  | IncFIB(K)        | catA1      |
| kpneumoniae | UCI_1        | N                                                             | 3                   |                        |                                  | IncI2            | blaTEM-1   |
|             |              |                                                               |                     |                        |                                  |                  |            |
| ecloacae    | BIDMC_33A    | N                                                             | 1                   | pBK30683               | KF954760.1                       | IncFIA(HI1)      | aac(6)-Ib  |

| species     | isolate name | resistance phenotype<br>(N=NON-SUSCEPTIBLE;<br>S=SUSCEPTIBLE) | putative<br>plasmid | Best hit Genbank       | Genbank accession<br>of best hit | plasmid replicon | gene name   |
|-------------|--------------|---------------------------------------------------------------|---------------------|------------------------|----------------------------------|------------------|-------------|
| ecloacae    | BIDMC_33A    | N                                                             | 1                   | pBK30683               | KF954760.1                       | IncFIA(HI1)      | aadA1       |
| ecloacae    | BIDMC_33A    | N                                                             | 1                   | pBK30683               | KF954760.1                       | IncFIA(HI1)      | blaKPC-3    |
| ecloacae    | BIDMC_33A    | N                                                             | 1                   | pBK30683               | KF954760.1                       | IncFIA(HI1)      | dfrA14      |
|             |              |                                                               |                     |                        |                                  |                  |             |
| ecoli       | UCI_51       | N                                                             | 1                   |                        |                                  |                  | blaTEM-1    |
| ecoli       | UCI_51       | N                                                             | 1                   |                        |                                  |                  | strA        |
| ecoli       | UCI_51       | N                                                             | 1                   |                        |                                  |                  | strB        |
| ecoli       | UCI_51       | N                                                             | 1                   |                        |                                  |                  | sul2        |
| ecoli       | UCI_51       | N                                                             | 2                   |                        |                                  | IncFIA           | tet(A)      |
| ecoli       | UCI_51       | N                                                             | 3                   |                        |                                  |                  | aadA5       |
| ecoli       | UCI_51       | N                                                             | 3                   |                        |                                  |                  | dfrA17      |
| ecoli       | UCI_51       | N                                                             | 3                   |                        |                                  |                  | mph(A)      |
| ecoli       | UCI_51       | N                                                             | 3                   |                        |                                  |                  | sul1        |
|             |              |                                                               |                     |                        |                                  |                  |             |
| kpneumoniae | BIDMC_34     | N                                                             | 1                   | pKpS90                 | JX461340.1                       | IncX3            | blaSHV-134  |
| kpneumoniae | BIDMC_34     | N                                                             | 2                   |                        |                                  |                  | aac(3)-IVa  |
| kpneumoniae | BIDMC_34     | N                                                             | 2                   |                        |                                  |                  | aadA2       |
| kpneumoniae | BIDMC_34     | N                                                             | 2                   |                        |                                  |                  | aph(4)-Ia   |
| kpneumoniae | BIDMC_34     | N                                                             | 2                   |                        |                                  |                  | blaKPC-2    |
| kpneumoniae | BIDMC_34     | N                                                             | 2                   |                        |                                  |                  | cmlA1       |
| kpneumoniae | BIDMC_34     | N                                                             | 2                   |                        |                                  |                  | sul3        |
| kpneumoniae | BIDMC_34     | N                                                             | 3                   | strain_JM45_plasmid_p1 | CP006657.1                       | IncFIB(K)        | aadA2       |
| kpneumoniae | BIDMC_34     | N                                                             | 3                   | strain_JM45_plasmid_p1 | CP006657.1                       | IncFIB(K)        | catA1       |
| kpneumoniae | BIDMC_34     | N                                                             | 3                   | strain_JM45_plasmid_p1 | CP006657.1                       | IncFIB(K)        | dfrA12      |
| kpneumoniae | BIDMC_34     | N                                                             | 3                   | strain_JM45_plasmid_p1 | CP006657.1                       | IncFIB(K)        | mph(A)      |
| kpneumoniae | BIDMC_34     | N                                                             | 3                   | strain_JM45_plasmid_p1 | CP006657.1                       | IncFIB(K)        | sul1        |
| kpneumoniae | BIDMC_34     | N                                                             | 4                   |                        |                                  | ColRNAI          | aac(6)-Ib   |
|             |              |                                                               |                     |                        |                                  |                  |             |
| ecoli       | BIDMC_82     | N                                                             | 1                   |                        |                                  |                  | aac(6)-IIc  |
| ecoli       | BIDMC_82     | N                                                             | 1                   |                        |                                  |                  | ere(A)      |
| ecoli       | BIDMC_82     | N                                                             | 1                   |                        |                                  |                  | sul1        |
| ecoli       | BIDMC_82     | N                                                             | 2                   |                        |                                  |                  | dfrA14      |
| ecoli       | BIDMC_82     | N                                                             | 3                   |                        |                                  |                  | mph(A)      |
| ecoli       | BIDMC_82     | N                                                             | 4                   |                        |                                  |                  | sul2        |
| ecoli       | BIDMC_82     | N                                                             | 5                   |                        |                                  |                  | blaKPC-2    |
| ecoli       | BIDMC_82     | N                                                             | 6                   |                        |                                  | IncB/O/K/Z       | blaCTX-M-14 |
| ecoli       | BIDMC_82     | N                                                             | 7                   |                        |                                  |                  | blaTEM-1    |
| ecoli       | BIDMC_82     | N                                                             | 8                   |                        |                                  |                  | blaSHV-134  |
|             |              |                                                               |                     |                        |                                  |                  |             |
| kpneumoniae | UCI_19       | N                                                             | 1                   | pKpQIL                 | GU595196.1                       | IncFIB(pQil)     | aac(6)-Ib   |
| kpneumoniae | UCI_19       | N                                                             | 1                   | pKpQIL                 | GU595196.1                       | IncFIB(pQil)     | blaKPC-2    |
| kpneumoniae | UCI_19       | N                                                             | 1                   | pKpQIL                 | GU595196.1                       | IncFIB(pQil)     | blaTEM-1    |
|             |              |                                                               |                     |                        |                                  |                  |             |
| ecoli       | BIDMC_19C    | N                                                             | 1                   |                        |                                  | IncN             | blaKPC-2    |
| ecoli       | BIDMC_19C    | N                                                             | 1                   |                        |                                  | IncN             | blaTEM-1    |
| ecoli       | BIDMC_19C    | N                                                             | 1                   |                        |                                  | IncN             | dfrA14      |
| ecoli       | BIDMC_19C    | N                                                             | 1                   |                        |                                  | IncN             | mph(A)      |
| ecoli       | BIDMC_19C    | N                                                             | 2                   | pEC-IMP                | EU855787.1                       | IncHI2A          | aac(6)-IIc  |
| ecoli       | BIDMC_19C    | N                                                             | 2                   | pEC-IMP                | EU855787.1                       | IncHI2A          | blaKPC-2    |

| species     | isolate name | resistance phenotype<br>(N=NON-SUSCEPTIBLE;<br>S=SUSCEPTIBLE) | putative<br>plasmid | Best hit Genbank       | Genbank accession<br>of best hit | plasmid replicon | gene name  |
|-------------|--------------|---------------------------------------------------------------|---------------------|------------------------|----------------------------------|------------------|------------|
| ecoli       | BIDMC_19C    | N                                                             | 2                   | pEC-IMP                | EU855787.1                       | IncHI2A          | blaSHV-134 |
| ecoli       | BIDMC_19C    | N                                                             | 2                   | pEC-IMP                | EU855787.1                       | IncHI2A          | ere(A)     |
| ecoli       | BIDMC_19C    | N                                                             | 2                   | pEC-IMP                | EU855787.1                       | IncHI2A          | sul1       |
| ecoli       | BIDMC_19C    | N                                                             | 2                   | pEC-IMP                | EU855787.1                       | IncHI2A          | sul2       |
|             |              |                                                               |                     |                        |                                  |                  |            |
| kpneumoniae | UCI_4        | S                                                             | 1                   |                        |                                  | IncFIB(K)        | aadA1      |
| kpneumoniae | UCI_4        | S                                                             | 1                   |                        |                                  | IncFIB(K)        | sul1       |
| kpneumoniae | UCI_4        | S                                                             | 1                   |                        |                                  | IncFIB(K)        | tet(D)     |
|             |              |                                                               |                     |                        |                                  |                  |            |
| kpneumoniae | UCI_63       | N                                                             | 1                   |                        |                                  |                  | blaCMY-2   |
| kpneumoniae | UCI_63       | N                                                             | 1                   |                        |                                  |                  | sul1       |
| kpneumoniae | UCI_63       | N                                                             | 2                   |                        |                                  |                  | floR       |
| kpneumoniae | UCI_63       | N                                                             | 2                   |                        |                                  |                  | tet(A)     |
| kpneumoniae | UCI_63       | N                                                             | 3                   |                        |                                  |                  | aac(6)-Ib  |
| kpneumoniae | UCI_63       | N                                                             | 4                   |                        |                                  |                  | strB       |
| kpneumoniae | UCI_63       | N                                                             | 4                   |                        |                                  |                  | sul2       |
| kpneumoniae | UCI_63       | N                                                             | 5                   |                        |                                  | IncN             | aph(3)-Ia  |
| kpneumoniae | UCI_63       | N                                                             | 5                   |                        |                                  | IncN             | blaKPC-2   |
| kpneumoniae | UCI_63       | N                                                             | 5                   |                        |                                  | IncN             | blaTEM-1   |
| kpneumoniae | UCI_63       | N                                                             | 6                   |                        |                                  |                  | aac(6)-Ib  |
|             |              |                                                               |                     |                        |                                  |                  |            |
| ecoli       | BIDMC_3      | N                                                             | 1                   |                        |                                  |                  | blaKPC-2   |
| ecoli       | BIDMC_3      | N                                                             | 2                   |                        |                                  | IncN             | blaTEM-1   |
| ecoli       | BIDMC_3      | N                                                             | 2                   |                        |                                  | IncN             | dfrA14     |
| ecoli       | BIDMC_3      | N                                                             | 2                   |                        |                                  | IncN             | mph(A)     |
| ecoli       | BIDMC_3      | N                                                             | 3                   | pEC-IMP                | EU855787.1                       | IncHI2A          | aac(6)-IIc |
| ecoli       | BIDMC_3      | N                                                             | 3                   | pEC-IMP                | EU855787.1                       | IncHI2A          | blaSHV-134 |
| ecoli       | BIDMC_3      | N                                                             | 3                   | pEC-IMP                | EU855787.1                       | IncHI2A          | ere(A)     |
| ecoli       | BIDMC_3      | N                                                             | 3                   | pEC-IMP                | EU855787.1                       | IncHI2A          | sul1       |
| ecoli       | BIDMC_3      | N                                                             | 3                   | pEC-IMP                | EU855787.1                       | IncHI2A          | sul2       |
|             |              |                                                               |                     |                        |                                  |                  |            |
| kpneumoniae | MGH_67       | N                                                             | 1                   |                        |                                  |                  | blaKPC-2   |
| kpneumoniae | MGH_67       | N                                                             | 2                   | pAAC154                | JF828150.1                       | ColRNAI          | aac(6)-Ib  |
| kpneumoniae | MGH_67       | N                                                             | 3                   |                        |                                  |                  | blaTEM-1   |
| kpneumoniae | MGH_67       | N                                                             | 4                   |                        |                                  |                  | aadA2      |
| kpneumoniae | MGH_67       | N                                                             | 4                   |                        |                                  |                  | aph(3)-Ia  |
| kpneumoniae | MGH_67       | N                                                             | 4                   |                        |                                  |                  | catA1      |
| kpneumoniae | MGH_67       | N                                                             | 4                   |                        |                                  |                  | dfrA12     |
| kpneumoniae | MGH_67       | N                                                             | 4                   |                        |                                  |                  | mph(A)     |
| kpneumoniae | MGH_67       | N                                                             | 4                   |                        |                                  |                  | sul1       |
|             |              |                                                               |                     |                        |                                  |                  |            |
| ecoli       | BIDMC_49B    | S                                                             | 1                   |                        |                                  | IncFIB(AP001918) | dfrA5      |
| ecoli       | BIDMC_49B    | S                                                             | 1                   |                        |                                  | IncFIB(AP001918) | tet(A)     |
|             |              |                                                               |                     |                        |                                  |                  |            |
| kpneumoniae | BIDMC_5      | N                                                             | 1                   | strain_JM45_plasmid_p1 | CP006657.1                       | IncFIB(K)        | aac(3)-IVa |
| kpneumoniae | BIDMC_5      | N                                                             | 1                   | strain_JM45_plasmid_p1 | CP006657.1                       | IncFIB(K)        | aadA1      |
| kpneumoniae | BIDMC_5      | N                                                             | 1                   | strain_JM45_plasmid_p1 | CP006657.1                       | IncFIB(K)        | aadA2      |
| kpneumoniae | BIDMC_5      | N                                                             | 1                   | strain_JM45_plasmid_p1 | CP006657.1                       | IncFIB(K)        | aph(3)-Ia  |
| kpneumoniae | BIDMC_5      | N                                                             | 1                   | strain_JM45_plasmid_p1 | CP006657.1                       | IncFIB(K)        | aph(4)-Ia  |

| species     | isolate name | resistance phenotype<br>(N=NON-SUSCEPTIBLE;<br>S=SUSCEPTIBLE) | putative<br>plasmid | Best hit Genbank       | Genbank accession<br>of best hit | plasmid replicon | gene name   |
|-------------|--------------|---------------------------------------------------------------|---------------------|------------------------|----------------------------------|------------------|-------------|
| kpneumoniae | BIDMC_5      | N                                                             | 1                   | strain_JM45_plasmid_p1 | CP006657.1                       | IncFIB(K)        | catA1       |
| kpneumoniae | BIDMC_5      | N                                                             | 1                   | strain_JM45_plasmid_p1 | CP006657.1                       | IncFIB(K)        | cmlA1       |
| kpneumoniae | BIDMC_5      | N                                                             | 1                   | strain_JM45_plasmid_p1 | CP006657.1                       | IncFIB(K)        | dfrA12      |
| kpneumoniae | BIDMC_5      | N                                                             | 1                   | strain_JM45_plasmid_p1 | CP006657.1                       | IncFIB(K)        | mph(A)      |
| kpneumoniae | BIDMC_5      | N                                                             | 1                   | strain_JM45_plasmid_p1 | CP006657.1                       | IncFIB(K)        | sul1        |
| kpneumoniae | BIDMC_5      | N                                                             | 1                   | strain_JM45_plasmid_p1 | CP006657.1                       | IncFIB(K)        | sul3        |
| kpneumoniae | BIDMC_5      | N                                                             | 2                   | pBK15692               | KC845573.1                       | IncI2            | blaKPC-3    |
| kpneumoniae | BIDMC_5      | N                                                             | 2                   | pBK15692               | KC845573.1                       | IncI2            | blaTEM-1    |
|             |              |                                                               |                     |                        |                                  |                  |             |
| ecoli       | BWH_24       | I                                                             | 1                   | pEK499                 | EU935739.1                       | IncFIA           | aadA5       |
| ecoli       | BWH_24       | I                                                             | 1                   | pEK499                 | EU935739.1                       | IncFIA           | blaKPC-3    |
| ecoli       | BWH_24       | I                                                             | 1                   | pEK499                 | EU935739.1                       | IncFIA           | dfrA17      |
| ecoli       | BWH_24       | I                                                             | 1                   | pEK499                 | EU935739.1                       | IncFIA           | strA        |
| ecoli       | BWH_24       | I                                                             | 1                   | pEK499                 | EU935739.1                       | IncFIA           | strB        |
| ecoli       | BWH_24       | I                                                             | 1                   | pEK499                 | EU935739.1                       | IncFIA           | sul1        |
| ecoli       | BWH_24       | I                                                             | 1                   | pEK499                 | EU935739.1                       | IncFIA           | sul2        |
| ecoli       | BWH_24       | I                                                             | 1                   | pEK499                 | EU935739.1                       | IncFIA           | tet(A)      |
|             |              |                                                               |                     |                        |                                  |                  |             |
| ecloacae    | MGH_26       | S                                                             | 1                   | pHCM2                  | AL513384.1                       | IncFIB(pHCM2)    | dfrA15      |
| ecloacae    | MGH_26       | S                                                             | 1                   | pHCM2                  | AL513384.1                       | IncFIB(pHCM2)    | sul1        |
|             |              |                                                               |                     |                        |                                  |                  |             |
| kpneumoniae | BIDMC_53     | I                                                             | 1                   |                        |                                  | IncFIB(pQil)     | blaSHV-134  |
| kpneumoniae | BIDMC_53     | I                                                             | 1                   |                        |                                  | IncFIB(pQil)     | blaTEM-1    |
| kpneumoniae | BIDMC_53     | I                                                             | 2                   |                        |                                  | IncFIB(K)        | aadA2       |
| kpneumoniae | BIDMC_53     | I                                                             | 2                   |                        |                                  | IncFIB(K)        | aadB        |
| kpneumoniae | BIDMC_53     | I                                                             | 2                   |                        |                                  | IncFIB(K)        | catB3       |
| kpneumoniae | BIDMC_53     | I                                                             | 2                   |                        |                                  | IncFIB(K)        | dfrA18      |
| kpneumoniae | BIDMC_53     | I                                                             | 2                   |                        |                                  | IncFIB(K)        | sul1        |
|             |              |                                                               |                     |                        |                                  |                  |             |
| cfreundii   | UCI_32       | S                                                             | 1                   |                        |                                  |                  | baca        |
| cfreundii   | UCI_32       | S                                                             | 1                   |                        |                                  |                  | bcra        |
|             |              |                                                               |                     |                        |                                  |                  |             |
| ecoli       | BIDMC_58     | N                                                             | 1                   | pEK499                 | EU935739.1                       | IncFIA           | aadA5       |
| ecoli       | BIDMC_58     | N                                                             | 1                   | pEK499                 | EU935739.1                       | IncFIA           | blaKPC-3    |
| ecoli       | BIDMC_58     | N                                                             | 1                   | pEK499                 | EU935739.1                       | IncFIA           | dfrA17      |
| ecoli       | BIDMC_58     | N                                                             | 1                   | pEK499                 | EU935739.1                       | IncFIA           | strA        |
| ecoli       | BIDMC_58     | N                                                             | 1                   | pEK499                 | EU935739.1                       | IncFIA           | strB        |
| ecoli       | BIDMC_58     | N                                                             | 1                   | pEK499                 | EU935739.1                       | IncFIA           | sul1        |
| ecoli       | BIDMC_58     | N                                                             | 1                   | pEK499                 | EU935739.1                       | IncFIA           | sul2        |
| ecoli       | BIDMC_58     | N                                                             | 1                   | pEK499                 | EU935739.1                       | IncFIA           | tet(A)      |
|             |              |                                                               |                     |                        |                                  |                  |             |
| ecoli       | BIDMC_63     | S                                                             | 1                   |                        |                                  | IncFIB(AP001918) | blaTEM-1    |
|             |              |                                                               |                     |                        |                                  |                  |             |
| kpneumoniae | BWH_2        | N                                                             | 1                   |                        |                                  | IncR             | aac(6)-Ib   |
| kpneumoniae | BWH_2        | N                                                             | 1                   |                        |                                  | IncR             | aadA1       |
| kpneumoniae | BWH_2        | N                                                             | 1                   |                        |                                  | IncR             | blaCTX-M-15 |
| kpneumoniae | BWH_2        | N                                                             | 1                   |                        |                                  | IncR             | blaOXA-9    |
| kpneumoniae | BWH_2        | N                                                             | 1                   |                        |                                  | IncR             | blaTEM-1    |
| kpneumoniae | BWH_2        | N                                                             | 2                   |                        |                                  | IncL/M(pOXA-48)  | blaOXA-48   |

| species     | isolate name | resistance phenotype<br>(N=NON-SUSCEPTIBLE;<br>S=SUSCEPTIBLE) | putative<br>plasmid | Best hit Genbank | Genbank accession<br>of best hit | plasmid replicon | gene name   |
|-------------|--------------|---------------------------------------------------------------|---------------------|------------------|----------------------------------|------------------|-------------|
| kpneumoniae | BWH_2        | N                                                             | 3                   |                  |                                  | IncFIA(HI1)      | aac(3)-IIa  |
| kpneumoniae | BWH_2        | N                                                             | 3                   |                  |                                  | IncFIA(HI1)      | aac(6)Ib-cr |
| kpneumoniae | BWH_2        | N                                                             | 3                   |                  |                                  | IncFIA(HI1)      | blaOXA-30   |
|             |              |                                                               |                     |                  |                                  |                  |             |
| ecoli       | BWH_40       | I                                                             | 1                   |                  |                                  | IncFIB(AP001918) | aadA5       |
| ecoli       | BWH_40       | I                                                             | 1                   |                  |                                  | IncFIB(AP001918) | blaCTX-M-15 |
| ecoli       | BWH_40       | I                                                             | 1                   |                  |                                  | IncFIB(AP001918) | dfrA17      |
| ecoli       | BWH_40       | I                                                             | 1                   |                  |                                  | IncFIB(AP001918) | mph(A)      |
| ecoli       | BWH_40       | I                                                             | 1                   |                  |                                  | IncFIB(AP001918) | sul1        |
| ecoli       | BWH_40       | I                                                             | 1                   |                  |                                  | IncFIB(AP001918) | tet(B)      |
|             |              |                                                               |                     |                  |                                  |                  |             |
| kpneumoniae | MGH_51       | N                                                             | 1                   |                  |                                  |                  | aac(6)-Ib   |
| kpneumoniae | MGH_51       | N                                                             | 2                   |                  |                                  |                  | aac(6)-Ib   |
| kpneumoniae | MGH_51       | N                                                             | 3                   |                  |                                  | IncFIB(K)        | aadA2       |
| kpneumoniae | MGH_51       | N                                                             | 3                   |                  |                                  | IncFIB(K)        | aph(3)-Ia   |
| kpneumoniae | MGH_51       | N                                                             | 3                   |                  |                                  | IncFIB(K)        | catA1       |
| kpneumoniae | MGH_51       | N                                                             | 3                   |                  |                                  | IncFIB(K)        | dfrA12      |
| kpneumoniae | MGH_51       | N                                                             | 3                   |                  |                                  | IncFIB(K)        | mph(A)      |
| kpneumoniae | MGH_51       | N                                                             | 3                   |                  |                                  | IncFIB(K)        | sul1        |
| kpneumoniae | MGH_51       | N                                                             | 4                   | pKpS90           | JX461340.1                       | IncX3            | blaSHV-134  |
| kpneumoniae | MGH_51       | N                                                             | 5                   |                  |                                  |                  | aac(6)-Ib   |
| kpneumoniae | MGH_51       | N                                                             | 6                   |                  |                                  | IncFIB(pQil)     | blaKPC-2    |
| kpneumoniae | MGH_51       | N                                                             | 6                   |                  |                                  | IncFIB(pQil)     | blaTEM-1    |
|             |              |                                                               |                     |                  |                                  |                  |             |
| ecoli       | MGH_58       | S                                                             | 1                   |                  |                                  | IncFIB(AP001918) | blaTEM-1    |
| ecoli       | MGH_58       | S                                                             | 1                   |                  |                                  | IncFIB(AP001918) | dfrA14      |
| ecoli       | MGH_58       | S                                                             | 1                   |                  |                                  | IncFIB(AP001918) | mph(A)      |
| ecoli       | MGH_58       | S                                                             | 1                   |                  |                                  | IncFIB(AP001918) | strA        |
| ecoli       | MGH_58       | S                                                             | 1                   |                  |                                  | IncFIB(AP001918) | strB        |
| ecoli       | MGH_58       | S                                                             | 1                   |                  |                                  | IncFIB(AP001918) | tet(B)      |
| ecoli       | MGH_58       | S                                                             | 2                   |                  |                                  | IncB/O/K/Z       | sul2        |
|             |              |                                                               |                     |                  |                                  |                  |             |
| ecoli       | BIDMC_43A    | I                                                             | 1                   | pEC-IMP          | EU855787.1                       | IncHI2A          | aac(6)-IIc  |
| ecoli       | BIDMC_43A    | I                                                             | 1                   | pEC-IMP          | EU855787.1                       | IncHI2A          | blaKPC-2    |
| ecoli       | BIDMC_43A    | I                                                             | 1                   | pEC-IMP          | EU855787.1                       | IncHI2A          | blaSHV-134  |
| ecoli       | BIDMC_43A    | I                                                             | 1                   | pEC-IMP          | EU855787.1                       | IncHI2A          | ere(A)      |
| ecoli       | BIDMC_43A    | I                                                             | 1                   | pEC-IMP          | EU855787.1                       | IncHI2A          | sul1        |
| ecoli       | BIDMC_43A    | I                                                             | 1                   | pEC-IMP          | EU855787.1                       | IncHI2A          | sul2        |
|             |              |                                                               |                     |                  |                                  |                  |             |
| cspecies    | MGH_55       | N                                                             | 1                   |                  |                                  |                  | arna        |
| cspecies    | MGH_55       | N                                                             | 1                   |                  |                                  |                  | Baca        |
| cspecies    | MGH_55       | N                                                             | 1                   |                  |                                  |                  | bcr         |
| cspecies    | MGH_55       | N                                                             | 1                   |                  |                                  |                  | bcra        |
| cspecies    | MGH_55       | N                                                             | 1                   |                  |                                  |                  | bl2b_ula    |
| cspecies    | MGH_55       | N                                                             | 1                   |                  |                                  |                  | ksga        |
| cspecies    | MGH_55       | N                                                             | 1                   |                  |                                  |                  | mdfa        |
| cspecies    | MGH_55       | N                                                             | 1                   |                  |                                  |                  | oqx B       |
| cspecies    | MGH_55       | N                                                             | 1                   |                  |                                  |                  | tet34       |
| cspecies    | MGH_55       | N                                                             | 2                   |                  |                                  |                  | ARR-3       |

| species     | isolate name | resistance phenotype<br>(N=NON-SUSCEPTIBLE;<br>S=SUSCEPTIBLE) | putative<br>plasmid | Best hit Genbank | Genbank accession<br>of best hit | plasmid replicon | gene name   |
|-------------|--------------|---------------------------------------------------------------|---------------------|------------------|----------------------------------|------------------|-------------|
| cspecies    | MGH_55       | N                                                             | 2                   |                  |                                  |                  | aac(3)-Ib   |
| cspecies    | MGH_55       | N                                                             | 2                   |                  |                                  |                  | aac(6)Ib-cr |
| cspecies    | MGH_55       | N                                                             | 2                   |                  |                                  |                  | blaKPC-4    |
| cspecies    | MGH_55       | N                                                             | 2                   |                  |                                  |                  | blaOXA-30   |
| cspecies    | MGH_55       | N                                                             | 2                   |                  |                                  |                  | blaTEM-1    |
| cspecies    | MGH_55       | N                                                             | 2                   |                  |                                  |                  | catB3       |
| cspecies    | MGH_55       | N                                                             | 2                   |                  |                                  |                  | sul1        |
|             |              |                                                               |                     |                  |                                  |                  |             |
| ecoli       | UCI_57       | S                                                             | 1                   |                  |                                  |                  | blaCMY-2    |
| ecoli       | UCI_57       | S                                                             | 2                   |                  |                                  |                  | aac(3)-VIa  |
| ecoli       | UCI_57       | S                                                             | 2                   |                  |                                  |                  | aadA1       |
| ecoli       | UCI_57       | S                                                             | 2                   |                  |                                  |                  | sul1        |
| ecoli       | UCI_57       | S                                                             | 2                   |                  |                                  |                  | tet(A)      |
|             |              |                                                               |                     |                  |                                  |                  |             |
| eaerogenes  | UCI_15       | N                                                             | 1                   |                  |                                  |                  | aadA5       |
| eaerogenes  | UCI_15       | N                                                             | 1                   |                  |                                  |                  | dfrA17      |
| eaerogenes  | UCI_15       | N                                                             | 1                   |                  |                                  |                  | mph(A)      |
| eaerogenes  | UCI_15       | N                                                             | 1                   |                  |                                  |                  | strB        |
| eaerogenes  | UCI_15       | N                                                             | 1                   |                  |                                  |                  | sul1        |
| eaerogenes  | UCI_15       | N                                                             | 1                   |                  |                                  |                  | sul2        |
| eaerogenes  | UCI_15       | N                                                             | 1                   |                  |                                  |                  | tet(A)      |
| eaerogenes  | UCI_15       | N                                                             | 2                   |                  |                                  | IncFIB(AP001918) | aac(3)-IIId |
| eaerogenes  | UCI_15       | N                                                             | 2                   |                  |                                  | IncFIB(AP001918) | blaTEM-1    |
|             |              |                                                               |                     |                  |                                  |                  |             |
| ecoli       | BIDMC_17A    | N                                                             | 1                   |                  |                                  |                  | blaSHV-134  |
| ecoli       | BIDMC_17A    | N                                                             | 2                   |                  |                                  | IncN             | blaTEM-1    |
| ecoli       | BIDMC_17A    | N                                                             | 2                   |                  |                                  | IncN             | dfrA14      |
| ecoli       | BIDMC_17A    | N                                                             | 2                   |                  |                                  | IncN             | mph(A)      |
| ecoli       | BIDMC_17A    | N                                                             | 3                   |                  |                                  |                  | blaKPC-2    |
| ecoli       | BIDMC_17A    | N                                                             | 4                   |                  |                                  |                  | blaSHV-134  |
| ecoli       | BIDMC_17A    | N                                                             | 5                   | pEC-IMP          | EU855787.1                       | IncHI2A          | aac(6)-IIc  |
| ecoli       | BIDMC_17A    | N                                                             | 5                   | pEC-IMP          | EU855787.1                       | IncHI2A          | ere(A)      |
| ecoli       | BIDMC_17A    | N                                                             | 5                   | pEC-IMP          | EU855787.1                       | IncHI2A          | sul1        |
| ecoli       | BIDMC_17A    | N                                                             | 5                   | pEC-IMP          | EU855787.1                       | IncHI2A          | sul2        |
|             |              |                                                               |                     |                  |                                  |                  |             |
| kpneumoniae | BIDMC_47     | S                                                             | 1                   |                  |                                  | IncFIA(HI1)      | strA        |
| kpneumoniae | BIDMC_47     | S                                                             | 1                   |                  |                                  | IncFIA(HI1)      | strB        |
| kpneumoniae | BIDMC_47     | S                                                             | 1                   |                  |                                  | IncFIA(HI1)      | sul2        |
|             |              |                                                               |                     |                  |                                  |                  |             |
| kpneumoniae | MGH_71       | N                                                             | 1                   |                  |                                  | IncFIB(K)        | blaKPC-2    |
| kpneumoniae | MGH_71       | N                                                             | 1                   |                  |                                  | IncFIB(K)        | blaTEM-1    |
| kpneumoniae | MGH_71       | N                                                             | 2                   | pEA1509_A        | FO203354.1                       | IncA/C2          | floR        |
| kpneumoniae | MGH_71       | N                                                             | 2                   | pEA1509_A        | FO203354.1                       | IncA/C2          | sul2        |
| kpneumoniae | MGH_71       | N                                                             | 3                   |                  |                                  |                  | ARR-2       |
| kpneumoniae | MGH_71       | N                                                             | 3                   |                  |                                  |                  | aadA1       |
| kpneumoniae | MGH_71       | N                                                             | 3                   |                  |                                  |                  | blaOXA-10   |
| kpneumoniae | MGH_71       | N                                                             | 3                   |                  |                                  |                  | cmIA1       |
| kpneumoniae | MGH_71       | N                                                             | 3                   |                  |                                  |                  | sul1        |
|             |              |                                                               |                     |                  |                                  |                  |             |

| species     | isolate name | resistance phenotype<br>(N=NON-SUSCEPTIBLE;<br>S=SUSCEPTIBLE) | putative<br>plasmid | Best hit Genbank       | Genbank accession<br>of best hit | plasmid replicon | gene name  |
|-------------|--------------|---------------------------------------------------------------|---------------------|------------------------|----------------------------------|------------------|------------|
| ecoli       | UCI_65       | S                                                             | 1                   |                        |                                  | IncFII(pRSB107)  | aac(3)-IId |
| ecoli       | UCI_65       | S                                                             | 1                   |                        |                                  | IncFII(pRSB107)  | aadA5      |
| ecoli       | UCI_65       | S                                                             | 1                   |                        |                                  | IncFII(pRSB107)  | blaTEM-1   |
| ecoli       | UCI_65       | S                                                             | 1                   |                        |                                  | IncFII(pRSB107)  | dfrA17     |
| ecoli       | UCI_65       | S                                                             | 1                   |                        |                                  | IncFII(pRSB107)  | mph(A)     |
| ecoli       | UCI_65       | S                                                             | 1                   |                        |                                  | IncFII(pRSB107)  | strA       |
| ecoli       | UCI_65       | S                                                             | 1                   |                        |                                  | IncFII(pRSB107)  | strB       |
| ecoli       | UCI_65       | S                                                             | 1                   |                        |                                  | IncFII(pRSB107)  | sul1       |
| ecoli       | UCI_65       | S                                                             | 1                   |                        |                                  | IncFII(pRSB107)  | sul2       |
| ecoli       | UCI_65       | S                                                             | 1                   |                        |                                  | IncFII(pRSB107)  | tet(A)     |
|             |              |                                                               |                     |                        |                                  |                  |            |
| kpneumoniae | BIDMC_18A    | N                                                             | 1                   |                        |                                  | IncR             | aac(3)-IVa |
| kpneumoniae | BIDMC_18A    | N                                                             | 1                   |                        |                                  | IncR             | aadA2      |
| kpneumoniae | BIDMC_18A    | N                                                             | 1                   |                        |                                  | IncR             | aph(4)-Ia  |
| kpneumoniae | BIDMC_18A    | N                                                             | 1                   |                        |                                  | IncR             | blaKPC-2   |
| kpneumoniae | BIDMC_18A    | N                                                             | 1                   |                        |                                  | IncR             | cmlA1      |
| kpneumoniae | BIDMC_18A    | N                                                             | 1                   |                        |                                  | IncR             | sul3       |
| kpneumoniae | BIDMC_18A    | N                                                             | 2                   | strain_JM45_plasmid_p1 | CP006657.1                       | IncFIB(K)        | aadA2      |
| kpneumoniae | BIDMC_18A    | N                                                             | 2                   | strain_JM45_plasmid_p1 | CP006657.1                       | IncFIB(K)        | catA1      |
| kpneumoniae | BIDMC_18A    | N                                                             | 2                   | strain_JM45_plasmid_p1 | CP006657.1                       | IncFIB(K)        | dfrA12     |
| kpneumoniae | BIDMC_18A    | N                                                             | 2                   | strain_JM45_plasmid_p1 | CP006657.1                       | IncFIB(K)        | mph(A)     |
| kpneumoniae | BIDMC_18A    | N                                                             | 2                   | strain_JM45_plasmid_p1 | CP006657.1                       | IncFIB(K)        | sul1       |
|             |              |                                                               |                     |                        |                                  |                  |            |
| kpneumoniae | BIDMC_23     | S                                                             | 1                   |                        |                                  | IncR             | aadA1      |
| kpneumoniae | BIDMC_23     | S                                                             | 1                   |                        |                                  | IncR             | sul1       |
|             |              |                                                               |                     |                        |                                  |                  |            |
| ecoli       | BIDMC_78     | S                                                             | 1                   |                        |                                  | IncFII           | blaTEM-1   |
|             |              |                                                               |                     |                        |                                  |                  |            |
| kpneumoniae | BIDMC_16     | N                                                             | 1                   |                        |                                  | IncI2            | blaTEM-1   |
| kpneumoniae | BIDMC_16     | N                                                             | 2                   |                        |                                  | ColRNAI          | aac(6)-Ib  |
| kpneumoniae | BIDMC_16     | N                                                             | 3                   | strain_JM45_plasmid_p1 | CP006657.1                       | IncR             | aac(3)-IVa |
| kpneumoniae | BIDMC_16     | N                                                             | 3                   | strain_JM45_plasmid_p1 | CP006657.1                       | IncR             | aac(6)-Ib  |
| kpneumoniae | BIDMC_16     | N                                                             | 3                   | strain_JM45_plasmid_p1 | CP006657.1                       | IncR             | aadA1      |
| kpneumoniae | BIDMC_16     | N                                                             | 3                   | strain_JM45_plasmid_p1 | CP006657.1                       | IncR             | aadA2      |
| kpneumoniae | BIDMC_16     | N                                                             | 3                   | strain_JM45_plasmid_p1 | CP006657.1                       | IncFIB(K)        | aadA2      |
| kpneumoniae | BIDMC_16     | N                                                             | 3                   | strain_JM45_plasmid_p1 | CP006657.1                       | IncFIB(K)        | aph(3)-Ia  |
| kpneumoniae | BIDMC_16     | N                                                             | 3                   | strain_JM45_plasmid_p1 | CP006657.1                       | IncR             | aph(4)-Ia  |
| kpneumoniae | BIDMC_16     | N                                                             | 3                   | strain_JM45_plasmid_p1 | CP006657.1                       | IncFIB(K)        | catA1      |
| kpneumoniae | BIDMC_16     | N                                                             | 3                   | strain_JM45_plasmid_p1 | CP006657.1                       | IncR             | cmlA1      |
| kpneumoniae | BIDMC_16     | N                                                             | 3                   | strain_JM45_plasmid_p1 | CP006657.1                       | IncFIB(K)        | dfrA12     |
| kpneumoniae | BIDMC_16     | N                                                             | 3                   | strain_JM45_plasmid_p1 | CP006657.1                       | IncFIB(K)        | mph(A)     |
| kpneumoniae | BIDMC_16     | N                                                             | 3                   | strain_JM45_plasmid_p1 | CP006657.1                       | IncFIB(K)        | sul1       |
| kpneumoniae | BIDMC_16     | N                                                             | 3                   | strain_JM45_plasmid_p1 | CP006657.1                       | IncR             | sul3       |
| kpneumoniae | BIDMC_16     | N                                                             | 4                   | pNJST258C1             | CP006922.1                       |                  | blaSHV-134 |
|             |              |                                                               |                     |                        |                                  |                  |            |
| kpneumoniae | BIDMC_11     | N                                                             | 1                   |                        |                                  | IncFIB(K)        | strA       |
| kpneumoniae | BIDMC_11     | N                                                             | 1                   |                        |                                  | IncFIB(K)        | strB       |
| kpneumoniae | BIDMC_11     | N                                                             | 1                   |                        |                                  | IncFIB(K)        | sul1       |
| kpneumoniae | BIDMC_11     | N                                                             | 2                   | pBK31551               | JX193301.1                       | IncN             | aac(3)-Ib  |

| species     | isolate name | resistance phenotype<br>(N=NON-SUSCEPTIBLE;<br>S=SUSCEPTIBLE) | putative<br>plasmid | Best hit Genbank       | Genbank accession<br>of best hit | plasmid replicon | gene name   |
|-------------|--------------|---------------------------------------------------------------|---------------------|------------------------|----------------------------------|------------------|-------------|
| kpneumoniae | BIDMC_11     | N                                                             | 2                   | pBK31551               | JX193301.1                       | IncN             | aph(3)-Ia   |
| kpneumoniae | BIDMC_11     | N                                                             | 2                   | pBK31551               | JX193301.1                       | IncN             | blaKPC-4    |
| kpneumoniae | BIDMC_11     | N                                                             | 2                   | pBK31551               | JX193301.1                       | IncN             | blaTEM-1    |
|             |              |                                                               |                     |                        |                                  |                  |             |
| kpneumoniae | BIDMC_18D    | S                                                             | 1                   |                        |                                  | IncFIB(pQil)     | aadA2       |
| kpneumoniae | BIDMC_18D    | S                                                             | 1                   |                        |                                  | IncFIB(pQil)     | aadB        |
| kpneumoniae | BIDMC_18D    | S                                                             | 1                   |                        |                                  | IncFIB(pQil)     | blaTEM-1    |
| kpneumoniae | BIDMC_18D    | S                                                             | 1                   |                        |                                  | IncFIB(pQil)     | catB3       |
| kpneumoniae | BIDMC_18D    | S                                                             | 1                   |                        |                                  | IncFIB(pQil)     | dfrA18      |
| kpneumoniae | BIDMC_18D    | S                                                             | 1                   |                        |                                  | IncFIB(pQil)     | sul1        |
|             |              |                                                               |                     |                        |                                  |                  |             |
| ecoli       | BIDMC_70     | S                                                             | 1                   |                        |                                  |                  | sul2        |
| ecoli       | BIDMC_70     | S                                                             | 2                   | pUT189                 | CP000244.1                       | IncFIB(AP001918) | blaTEM-1    |
| ecoli       | BIDMC_70     | S                                                             | 2                   | pUT189                 | CP000244.1                       | IncFIB(AP001918) | tet(B)      |
| ecoli       | BIDMC_70     | S                                                             | 3                   |                        |                                  |                  | aadA1       |
| ecoli       | BIDMC_70     | S                                                             | 3                   |                        |                                  |                  | dfrA1       |
|             |              |                                                               |                     |                        |                                  |                  |             |
| kpneumoniae | BIDMC_10     | N                                                             | 1                   |                        |                                  |                  | aph(3)-Ia   |
| kpneumoniae | BIDMC_10     | N                                                             | 2                   |                        |                                  |                  | aac(3)-IVa  |
| kpneumoniae | BIDMC_10     | N                                                             | 2                   |                        |                                  |                  | aadA1       |
| kpneumoniae | BIDMC_10     | N                                                             | 2                   |                        |                                  |                  | aadA2       |
| kpneumoniae | BIDMC_10     | N                                                             | 2                   |                        |                                  |                  | aph(4)-Ia   |
| kpneumoniae | BIDMC_10     | N                                                             | 2                   |                        |                                  |                  | cmlA1       |
| kpneumoniae | BIDMC_10     | N                                                             | 2                   |                        |                                  |                  | sul3        |
| kpneumoniae | BIDMC_10     | N                                                             | 3                   | strain_JM45_plasmid_p1 | CP006657.1                       | IncFIB(K)        | aadA2       |
| kpneumoniae | BIDMC_10     | N                                                             | 3                   | strain_JM45_plasmid_p1 | CP006657.1                       | IncFIB(K)        | catA1       |
| kpneumoniae | BIDMC_10     | N                                                             | 3                   | strain_JM45_plasmid_p1 | CP006657.1                       | IncFIB(K)        | dfrA12      |
| kpneumoniae | BIDMC_10     | N                                                             | 3                   | strain_JM45_plasmid_p1 | CP006657.1                       | IncFIB(K)        | mph(A)      |
| kpneumoniae | BIDMC_10     | N                                                             | 3                   | strain_JM45_plasmid_p1 | CP006657.1                       | IncFIB(K)        | sul1        |
| kpneumoniae | BIDMC_10     | N                                                             | 4                   | pBK15692               | KC845573.1                       | IncI2            | blaTEM-1    |
|             |              |                                                               |                     |                        |                                  |                  |             |
| ecoli       | UCI_53       | I                                                             | 1                   |                        |                                  | IncFIB(AP001918) | aac(6)Ib-cr |
| ecoli       | UCI_53       | I                                                             | 1                   |                        |                                  | IncFIB(AP001918) | blaCTX-M-15 |
| ecoli       | UCI_53       | I                                                             | 1                   |                        |                                  | IncFIB(AP001918) | blaOXA-30   |
| ecoli       | UCI_53       | I                                                             | 1                   |                        |                                  | IncFIB(AP001918) | tet(A)      |
|             |              |                                                               |                     |                        |                                  |                  |             |
| abaumanii   | BIDMC_57     | S                                                             | 1                   |                        |                                  |                  | aph3ia      |
| abaumanii   | BIDMC_57     | S                                                             | 1                   |                        |                                  |                  | bcra        |
|             |              |                                                               |                     |                        |                                  |                  |             |
| kpneumoniae | MGH_73       | N                                                             | 1                   | pKpS90                 | JX461340.1                       | IncX3            | blaSHV-134  |
| kpneumoniae | MGH_73       | N                                                             | 2                   |                        |                                  | ColRNAI          | aac(6)-Ib   |
| kpneumoniae | MGH_73       | N                                                             | 2                   |                        |                                  | ColRNAI          | aadA1       |
| kpneumoniae | MGH_73       | N                                                             | 2                   |                        |                                  | ColRNAI          | blaKPC-3    |
| kpneumoniae | MGH_73       | N                                                             | 2                   |                        |                                  | ColRNAI          | blaTEM-1    |
|             |              |                                                               |                     |                        |                                  |                  |             |
| ecloacae    | UCI_36       | S                                                             | 1                   |                        |                                  | IncFIA(HI1)      | dfrA22      |
| ecloacae    | UCI_36       | S                                                             | 1                   |                        |                                  | IncFIA(HI1)      | strA        |
| ecloacae    | UCI_36       | S                                                             | 1                   |                        |                                  | IncFIA(HI1)      | sul1        |
| ecloacae    | UCI_36       | S                                                             | 1                   |                        |                                  | IncFIA(HI1)      | tet(D)      |



| species  | isolate name | resistance phenotype<br>(N=NON-SUSCEPTIBLE;<br>S=SUSCEPTIBLE) | putative<br>plasmid | Best hit Genbank | Genbank accession<br>of best hit | plasmid replicon | gene name   |
|----------|--------------|---------------------------------------------------------------|---------------------|------------------|----------------------------------|------------------|-------------|
| ecoli    | BIDMC_77     | S                                                             | 1                   |                  |                                  |                  | aac(6)Ib-cr |
| ecoli    | BIDMC_77     | S                                                             | 1                   |                  |                                  |                  | aadA5       |
| ecoli    | BIDMC_77     | S                                                             | 1                   |                  |                                  |                  | blaCTX-M-15 |
| ecoli    | BIDMC_77     | S                                                             | 1                   |                  |                                  |                  | blaOXA-30   |
| ecoli    | BIDMC_77     | S                                                             | 1                   |                  |                                  |                  | dfrA17      |
| ecoli    | BIDMC_77     | S                                                             | 1                   |                  |                                  |                  | sul1        |
| ecoli    | BIDMC_77     | S                                                             | 2                   |                  |                                  |                  | mph(A)      |
| ecoli    | BIDMC_77     | S                                                             | 2                   |                  |                                  |                  | tet(B)      |
| ecloacae | BWH_37       | I                                                             | 1                   | pK29             | EF382672.1                       | IncHI2A          | aadA1       |
| ecloacae | BWH_37       | I                                                             | 1                   | pK29             | EF382672.1                       | IncHI2A          | blaKPC-4    |
| ecloacae | BWH_37       | I                                                             | 1                   | pK29             | EF382672.1                       | IncHI2A          | blaOXA-129  |
| ecloacae | BWH_37       | I                                                             | 1                   | pK29             | EF382672.1                       | IncHI2A          | dfrA21      |
| ecloacae | BWH_37       | I                                                             | 1                   | pK29             | EF382672.1                       | IncHI2A          | strA        |
| ecloacae | BWH_37       | I                                                             | 1                   | pK29             | EF382672.1                       | IncHI2A          | strB        |
| ecloacae | BWH_37       | I                                                             | 1                   | pK29             | EF382672.1                       | IncHI2A          | sul1        |
| ecloacae | BWH_37       | I                                                             | 1                   | pK29             | EF382672.1                       | IncHI2A          | tet(B)      |
| ecoli    | BIDMC_6      | N                                                             | 1                   |                  |                                  | IncN             | blaTEM-1    |
| ecoli    | BIDMC_6      | N                                                             | 1                   |                  |                                  | IncN             | dfrA14      |
| ecoli    | BIDMC_6      | N                                                             | 1                   |                  |                                  | IncN             | mph(A)      |
| ecoli    | BIDMC_6      | N                                                             | 2                   |                  |                                  |                  | blaKPC-2    |
| ecoli    | BIDMC_6      | N                                                             | 3                   | pEC-IMP          | EU855787.1                       | IncHI2A          | aac(6)-IIc  |
| ecoli    | BIDMC_6      | N                                                             | 3                   | pEC-IMP          | EU855787.1                       | IncHI2A          | blaSHV-134  |
| ecoli    | BIDMC_6      | N                                                             | 3                   | pEC-IMP          | EU855787.1                       | IncHI2A          | ere(A)      |
| ecoli    | BIDMC_6      | N                                                             | 3                   | pEC-IMP          | EU855787.1                       | IncHI2A          | sul1        |
| ecoli    | BIDMC_6      | N                                                             | 3                   | pEC-IMP          | EU855787.1                       | IncHI2A          | sul2        |
| ecloacae | MGH_14       | N                                                             | 1                   |                  |                                  |                  | aac(6)-IIc  |
| ecloacae | MGH_14       | N                                                             | 1                   |                  |                                  |                  | aac3iia     |
| ecloacae | MGH_14       | N                                                             | 1                   |                  |                                  |                  | aph(3)-Ia   |
| ecloacae | MGH_14       | N                                                             | 1                   |                  |                                  |                  | blaTEM-1    |
| ecloacae | MGH_14       | N                                                             | 1                   |                  |                                  |                  | ere(A)      |
| ecloacae | MGH_14       | N                                                             | 1                   |                  |                                  |                  | sul1        |
| ecloacae | MGH_14       | N                                                             | 1                   |                  |                                  |                  | sul2        |
| ecloacae | MGH_14       | N                                                             | 1                   |                  |                                  |                  | tet(D)      |
| ecloacae | MGH_14       | N                                                             | 2                   |                  |                                  |                  | aadA2       |
| ecloacae | MGH_14       | N                                                             | 2                   |                  |                                  |                  | sul1        |
| ecloacae | MGH_14       | N                                                             | 3                   |                  |                                  |                  | Qnr-B2      |
| ecloacae | MGH_14       | N                                                             | 3                   |                  |                                  |                  | aac(6)-Ib   |
| ecloacae | MGH_14       | N                                                             | 3                   |                  |                                  |                  | aadA1       |
| ecloacae | MGH_14       | N                                                             | 3                   |                  |                                  |                  | aadA2       |
| ecloacae | MGH_14       | N                                                             | 3                   |                  |                                  |                  | blaKPC-3    |
| ecloacae | MGH_14       | N                                                             | 3                   |                  |                                  |                  | blaOXA-9    |
| ecloacae | MGH_14       | N                                                             | 3                   |                  |                                  |                  | blaSHV-38   |
| ecloacae | MGH_14       | N                                                             | 3                   |                  |                                  |                  | blaTEM-1    |
| ecloacae | MGH_14       | N                                                             | 3                   |                  |                                  |                  | sul1        |
| ecloacae | MGH_14       | N                                                             | 4                   |                  |                                  |                  | aph(3)-Ia   |

| species     | isolate name | resistance phenotype<br>(N=NON-SUSCEPTIBLE;<br>S=SUSCEPTIBLE) | putative<br>plasmid | Best hit Genbank | Genbank accession<br>of best hit | plasmid replicon | gene name   |
|-------------|--------------|---------------------------------------------------------------|---------------------|------------------|----------------------------------|------------------|-------------|
| ecloacae    | MGH_14       | N                                                             | 4                   |                  |                                  |                  | dfrA18      |
| ecloacae    | MGH_14       | N                                                             | 4                   |                  |                                  |                  | strB        |
| ecloacae    | MGH_14       | N                                                             | 4                   |                  |                                  |                  | sul1        |
|             |              |                                                               |                     |                  |                                  |                  |             |
| koxytoca    | MGH_41       | N                                                             | 1                   |                  |                                  |                  | aac(6)-Ib   |
| koxytoca    | MGH_41       | N                                                             | 1                   |                  |                                  |                  | aadA1       |
| koxytoca    | MGH_41       | N                                                             | 1                   |                  |                                  |                  | blaKPC-2    |
| koxytoca    | MGH_41       | N                                                             | 1                   |                  |                                  |                  | blaOXA-9    |
| koxytoca    | MGH_41       | N                                                             | 1                   |                  |                                  |                  | blaTEM-1    |
|             |              |                                                               |                     |                  |                                  |                  |             |
| kpneumoniae | UCI_41       | N                                                             | 1                   |                  |                                  |                  | blaKPC-3    |
| kpneumoniae | UCI_41       | N                                                             | 2                   | pKpS90           | JX461340.1                       | IncX3            | aph(3)-Ia   |
| kpneumoniae | UCI_41       | N                                                             | 2                   | pKpS90           | JX461340.1                       | IncX3            | mph(A)      |
|             |              |                                                               |                     |                  |                                  |                  |             |
| kpneumoniae | UCI_17       | N                                                             | 1                   |                  |                                  | IncFIB(pQil)     | aac(3)-IIId |
| kpneumoniae | UCI_17       | N                                                             | 1                   |                  |                                  | IncFIB(pQil)     | blaKPC-2    |
| kpneumoniae | UCI_17       | N                                                             | 1                   |                  |                                  | IncFIB(pQil)     | blaTEM-1    |
| kpneumoniae | UCI_17       | N                                                             | 1                   |                  |                                  | IncFIB(pQil)     | dfrA5       |
| kpneumoniae | UCI_17       | N                                                             | 1                   |                  |                                  | IncFIB(pQil)     | tet(D)      |
| kpneumoniae | UCI_17       | N                                                             | 2                   |                  |                                  |                  | aac(6)-Ib   |
|             |              |                                                               |                     |                  |                                  |                  |             |
| kpneumoniae | MGH_75       | N                                                             | 1                   |                  |                                  |                  | tet(D)      |
| kpneumoniae | MGH_75       | N                                                             | 2                   |                  |                                  |                  | tet34       |
| kpneumoniae | MGH_75       | N                                                             | 3                   |                  |                                  |                  | blaCTX-M-15 |
| kpneumoniae | MGH_75       | N                                                             | 4                   |                  |                                  |                  | tet(A)      |
| kpneumoniae | MGH_75       | N                                                             | 5                   |                  |                                  |                  | Qnr-B4      |
| kpneumoniae | MGH_75       | N                                                             | 6                   |                  |                                  |                  | floR        |
| kpneumoniae | MGH_75       | N                                                             | 6                   |                  |                                  |                  | sul2        |
|             |              |                                                               |                     |                  |                                  |                  |             |
| ecloacae    | UCI_49       | S                                                             | 1                   |                  |                                  | IncFII(pECLA)    | aac(3)-IIb  |
| ecloacae    | UCI_49       | S                                                             | 2                   |                  |                                  |                  | ARR-3       |
| ecloacae    | UCI_49       | S                                                             | 2                   |                  |                                  |                  | aac(6)Ib-cr |
| ecloacae    | UCI_49       | S                                                             | 2                   |                  |                                  |                  | blaFOX-3    |
| ecloacae    | UCI_49       | S                                                             | 2                   |                  |                                  |                  | blaOXA-30   |
| ecloacae    | UCI_49       | S                                                             | 2                   |                  |                                  |                  | blaTEM-1    |
| ecloacae    | UCI_49       | S                                                             | 2                   |                  |                                  |                  | catB3       |
| ecloacae    | UCI_49       | S                                                             | 2                   |                  |                                  |                  | mph(A)      |
| ecloacae    | UCI_49       | S                                                             | 2                   |                  |                                  |                  | sul1        |
|             |              |                                                               |                     |                  |                                  |                  |             |
| kpneumoniae | BIDMC_68     | N                                                             | 1                   |                  |                                  | IncFIB(pQil)     | blaTEM-1    |
| kpneumoniae | BIDMC_68     | N                                                             | 2                   | pBK32179         | JX430448.1                       | IncFIB(K)        | blaKPC-2    |
| kpneumoniae | BIDMC_68     | N                                                             | 3                   |                  |                                  | ColRNAI          | aac(6)-Ib   |
| kpneumoniae | BIDMC_68     | N                                                             | 3                   |                  |                                  | ColRNAI          | blaTEM-1    |
| kpneumoniae | BIDMC_68     | N                                                             | 4                   |                  |                                  |                  | aadA2       |
| kpneumoniae | BIDMC_68     | N                                                             | 4                   |                  |                                  |                  | aph(3)-Ia   |
| kpneumoniae | BIDMC_68     | N                                                             | 4                   |                  |                                  |                  | catA1       |
| kpneumoniae | BIDMC_68     | N                                                             | 4                   |                  |                                  |                  | dfrA12      |
| kpneumoniae | BIDMC_68     | N                                                             | 4                   |                  |                                  |                  | mph(A)      |
| kpneumoniae | BIDMC_68     | N                                                             | 4                   |                  |                                  |                  | sul1        |

| species  | isolate name | resistance phenotype<br>(N=NON-SUSCEPTIBLE;<br>S=SUSCEPTIBLE) | putative<br>plasmid | Best hit Genbank | Genbank accession<br>of best hit | plasmid replicon | gene name  |
|----------|--------------|---------------------------------------------------------------|---------------------|------------------|----------------------------------|------------------|------------|
| ecloacae | BIDMC_28     | S                                                             | 1                   |                  |                                  | IncFII(pECLA)    | dfrA14     |
| ecloacae | BIDMC_28     | S                                                             | 1                   |                  |                                  | IncFII(pECLA)    | strA       |
| ecloacae | BIDMC_28     | S                                                             | 1                   |                  |                                  | IncFII(pECLA)    | strB       |
| ecloacae | BIDMC_28     | S                                                             | 1                   |                  |                                  | IncFII(pECLA)    | sul2       |
| ecoli    | BIDMC_2B     | N                                                             | 1                   |                  |                                  | IncN             | blaTEM-1   |
| ecoli    | BIDMC_2B     | N                                                             | 1                   |                  |                                  | IncN             | dfrA14     |
| ecoli    | BIDMC_2B     | N                                                             | 1                   |                  |                                  | IncN             | mph(A)     |
| ecoli    | BIDMC_2B     | N                                                             | 2                   |                  |                                  |                  | blaKPC-2   |
| ecoli    | BIDMC_2B     | N                                                             | 3                   | pEC-IMP          | EU855787.1                       | IncHI2A          | aac(6)-IIc |
| ecoli    | BIDMC_2B     | N                                                             | 3                   | pEC-IMP          | EU855787.1                       | IncHI2A          | blaSHV-134 |
| ecoli    | BIDMC_2B     | N                                                             | 3                   | pEC-IMP          | EU855787.1                       | IncHI2A          | ere(A)     |
| ecoli    | BIDMC_2B     | N                                                             | 3                   | pEC-IMP          | EU855787.1                       | IncHI2A          | sul1       |
| ecoli    | BIDMC_2B     | N                                                             | 3                   | pEC-IMP          | EU855787.1                       | IncHI2A          | sul2       |
| ecloacae | BWH_39       | I                                                             | 1                   |                  |                                  |                  | Qnr-S1     |
| ecloacae | BWH_39       | I                                                             | 2                   | pBK31551         | JX193301.1                       | IncN             | aac(3)-Ib  |
| ecloacae | BWH_39       | I                                                             | 2                   | pBK31551         | JX193301.1                       | IncN             | aph(3)-Ia  |
| ecloacae | BWH_39       | I                                                             | 2                   | pBK31551         | JX193301.1                       | IncN             | blaKPC-4   |
| ecloacae | BWH_39       | I                                                             | 2                   | pBK31551         | JX193301.1                       | IncN             | blaTEM-1   |
| ecloacae | BWH_39       | I                                                             | 2                   | pBK31551         | JX193301.1                       | IncN             | dfrA14     |
| ecloacae | BWH_39       | I                                                             | 2                   | pBK31551         | JX193301.1                       | IncN             | sul1       |
| ecoli    | BIDMC_75     | S                                                             | 1                   |                  |                                  | IncFIB(AP001918) | aadA5      |
| ecoli    | BIDMC_75     | S                                                             | 1                   |                  |                                  | IncFIB(AP001918) | dfrA17     |
| ecoli    | BIDMC_75     | S                                                             | 1                   |                  |                                  | IncFIB(AP001918) | mph(A)     |
| ecoli    | BIDMC_75     | S                                                             | 1                   |                  |                                  | IncFIB(AP001918) | strA       |
| ecoli    | BIDMC_75     | S                                                             | 1                   |                  |                                  | IncFIB(AP001918) | strB       |
| ecoli    | BIDMC_75     | S                                                             | 1                   |                  |                                  | IncFIB(AP001918) | sul1       |
| ecoli    | BIDMC_75     | S                                                             | 1                   |                  |                                  | IncFIB(AP001918) | sul2       |
| ecoli    | BIDMC_75     | S                                                             | 1                   |                  |                                  | IncFIB(AP001918) | tet(A)     |
| ecoli    | BIDMC_75     | S                                                             | 2                   |                  |                                  |                  | aac(3)-IId |
| ecoli    | BIDMC_75     | S                                                             | 3                   |                  |                                  | IncFII(29)       | blaTEM-1   |
| ecoli    | BIDMC_17B    | N                                                             | 1                   |                  |                                  |                  | blaKPC-2   |
| ecoli    | BIDMC_17B    | N                                                             | 2                   | pEC-IMP          | EU855787.1                       | IncHI2A          | aac(6)-IIc |
| ecoli    | BIDMC_17B    | N                                                             | 2                   | pEC-IMP          | EU855787.1                       | IncHI2A          | blaSHV-134 |
| ecoli    | BIDMC_17B    | N                                                             | 2                   | pEC-IMP          | EU855787.1                       | IncHI2A          | ere(A)     |
| ecoli    | BIDMC_17B    | N                                                             | 2                   | pEC-IMP          | EU855787.1                       | IncHI2A          | sul1       |
| ecoli    | BIDMC_17B    | N                                                             | 2                   | pEC-IMP          | EU855787.1                       | IncHI2A          | sul2       |
| ecoli    | BIDMC_17B    | N                                                             | 3                   |                  |                                  | IncN             | blaTEM-1   |
| ecoli    | BIDMC_17B    | N                                                             | 3                   |                  |                                  | IncN             | dfrA14     |
| ecoli    | BIDMC_17B    | N                                                             | 3                   |                  |                                  | IncN             | mph(A)     |
| ecloacae | MGH_8        | N                                                             | 1                   | pHCM2            | AL513384.1                       | IncFIB(pHCM2)    | dfrA15     |
| ecloacae | MGH_8        | N                                                             | 1                   | pHCM2            | AL513384.1                       | IncFIB(pHCM2)    | sul1       |
| ecloacae | MGH_8        | N                                                             | 2                   | pBK31551         | JX193301.1                       | IncN             | aac(3)-Ib  |
| ecloacae | MGH_8        | N                                                             | 2                   | pBK31551         | JX193301.1                       | IncN             | aph(3)-Ia  |

| species     | isolate name | resistance phenotype<br>(N=NON-SUSCEPTIBLE;<br>S=SUSCEPTIBLE) | putative<br>plasmid | Best hit Genbank       | Genbank accession<br>of best hit | plasmid replicon | gene name |
|-------------|--------------|---------------------------------------------------------------|---------------------|------------------------|----------------------------------|------------------|-----------|
| ecloacae    | MGH_8        | N                                                             | 2                   | pBK31551               | JX193301.1                       | IncN             | blaKPC-4  |
| ecloacae    | MGH_8        | N                                                             | 2                   | pBK31551               | JX193301.1                       | IncN             | blaTEM-1  |
| ecloacae    | MGH_8        | N                                                             | 2                   | pBK31551               | JX193301.1                       | IncN             | dfrA14    |
| ecloacae    | MGH_8        | N                                                             | 2                   | pBK31551               | JX193301.1                       | IncN             | sul1      |
| ecloacae    | MGH_8        | N                                                             | 3                   |                        |                                  |                  | Qnr-S1    |
|             |              |                                                               |                     |                        |                                  |                  |           |
| ecloacae    | MGH_11       | N                                                             | 1                   |                        |                                  | IncFIB(pHCM2)    | aac(3)-Ib |
| ecloacae    | MGH_11       | N                                                             | 1                   |                        |                                  | IncFIB(pHCM2)    | aph(3)-Ia |
| ecloacae    | MGH_11       | N                                                             | 1                   |                        |                                  | IncFIB(pHCM2)    | blaTEM-1  |
| ecloacae    | MGH_11       | N                                                             | 1                   |                        |                                  | IncFIB(pHCM2)    | dfrA14    |
| ecloacae    | MGH_11       | N                                                             | 1                   |                        |                                  | IncFIB(pHCM2)    | dfrA15    |
| ecloacae    | MGH_11       | N                                                             | 1                   |                        |                                  | IncFIB(pHCM2)    | sul1      |
| ecloacae    | MGH_11       | N                                                             | 2                   |                        |                                  |                  | Qnr-S1    |
| ecloacae    | MGH_11       | N                                                             | 3                   |                        |                                  |                  | blaKPC-4  |
|             |              |                                                               |                     |                        |                                  |                  |           |
| ecoli       | BIDMC_73     | S                                                             | 1                   |                        |                                  | IncFIB(AP001918) | strA      |
| ecoli       | BIDMC_73     | S                                                             | 1                   |                        |                                  | IncFIB(AP001918) | strB      |
| ecoli       | BIDMC_73     | S                                                             | 1                   |                        |                                  | IncFIB(AP001918) | sul2      |
| ecoli       | BIDMC_73     | S                                                             | 2                   |                        |                                  |                  | dfrA17    |
| ecoli       | BIDMC_73     | S                                                             | 2                   |                        |                                  |                  | mph(A)    |
| ecoli       | BIDMC_73     | S                                                             | 2                   |                        |                                  |                  | tet(B)    |
|             |              |                                                               |                     |                        |                                  |                  |           |
| kpneumoniae | BWH_45       | N                                                             | 1                   |                        |                                  |                  | sul2      |
| kpneumoniae | BWH_45       | N                                                             | 2                   |                        |                                  |                  | aadA2     |
| kpneumoniae | BWH_45       | N                                                             | 2                   |                        |                                  |                  | blaKPC-2  |
| kpneumoniae | BWH_45       | N                                                             | 2                   |                        |                                  |                  | dfrA12    |
| kpneumoniae | BWH_45       | N                                                             | 3                   |                        |                                  |                  | aadA2     |
| kpneumoniae | BWH_45       | N                                                             | 3                   |                        |                                  |                  | dfrA12    |
| kpneumoniae | BWH_45       | N                                                             | 3                   |                        |                                  |                  | sul1      |
| kpneumoniae | BWH_45       | N                                                             | 4                   |                        |                                  | ColRNAI          | aac(6)-Ib |
| kpneumoniae | BWH_45       | N                                                             | 4                   |                        |                                  | ColRNAI          | blaTEM-1  |
| kpneumoniae | BWH_45       | N                                                             | 5                   |                        |                                  |                  | aac(6)-33 |
| kpneumoniae | BWH_45       | N                                                             | 5                   |                        |                                  |                  | aadB      |
| kpneumoniae | BWH_45       | N                                                             | 5                   |                        |                                  |                  | sul1      |
| kpneumoniae | BWH_45       | N                                                             | 6                   |                        |                                  | IncA/C2          | floR      |
| kpneumoniae | BWH_45       | N                                                             | 7                   |                        |                                  |                  | aph(3)-Ia |
| kpneumoniae | BWH_45       | N                                                             | 7                   |                        |                                  |                  | mph(A)    |
|             |              |                                                               |                     |                        |                                  |                  |           |
| kpneumoniae | BIDMC_14     | N                                                             | 1                   |                        |                                  |                  | Qnr-B19   |
| kpneumoniae | BIDMC_14     | N                                                             | 1                   |                        |                                  |                  | aadA1     |
| kpneumoniae | BIDMC_14     | N                                                             | 1                   |                        |                                  |                  | blaKPC-3  |
| kpneumoniae | BIDMC_14     | N                                                             | 2                   | strain_JM45_plasmid_p1 | CP006657.1                       | IncFIB(K)        | aadA2     |
| kpneumoniae | BIDMC_14     | N                                                             | 2                   | strain_JM45_plasmid_p1 | CP006657.1                       | IncFIB(K)        | catA1     |
| kpneumoniae | BIDMC_14     | N                                                             | 2                   | strain_JM45_plasmid_p1 | CP006657.1                       | IncFIB(K)        | dfrA12    |
| kpneumoniae | BIDMC_14     | N                                                             | 2                   | strain_JM45_plasmid_p1 | CP006657.1                       | IncFIB(K)        | mph(A)    |
| kpneumoniae | BIDMC_14     | N                                                             | 2                   | strain_JM45_plasmid_p1 | CP006657.1                       | IncFIB(K)        | sul1      |
| kpneumoniae | BIDMC_14     | N                                                             | 3                   |                        |                                  |                  | blaTEM-1  |
|             |              |                                                               |                     |                        |                                  |                  |           |
| ecoli       | BIDMC_49A    | S                                                             | 1                   | pECOS88                | CU928146.1                       | IncFIB(AP001918) | dfrA5     |

| species     | isolate name | resistance phenotype<br>(N=NON-SUSCEPTIBLE;<br>S=SUSCEPTIBLE) | putative<br>plasmid | Best hit Genbank | Genbank accession<br>of best hit | plasmid replicon | gene name  |
|-------------|--------------|---------------------------------------------------------------|---------------------|------------------|----------------------------------|------------------|------------|
| ecoli       | BIDMC_49A    | S                                                             | 1                   | pECOS88          | CU928146.1                       | IncFIB(AP001918) | tet(A)     |
| kpneumoniae | BIDMC_41     | S                                                             | 1                   |                  |                                  | IncFIB(pQil)     | blaSHV-134 |
| kpneumoniae | BIDMC_41     | S                                                             | 1                   |                  |                                  | IncFIB(pQil)     | blaTEM-1   |
| kpneumoniae | BIDMC_41     | S                                                             | 2                   |                  |                                  |                  | aadB       |
| kpneumoniae | BIDMC_41     | S                                                             | 2                   |                  |                                  |                  | catB3      |
| kpneumoniae | BIDMC_41     | S                                                             | 2                   |                  |                                  |                  | dfrA18     |
| kpneumoniae | BIDMC_41     | S                                                             | 2                   |                  |                                  |                  | sul1       |
| kpneumoniae | BIDMC_41     | S                                                             | 3                   |                  |                                  | IncFIB(K)        | aadA2      |
| ecloacae    | MGH_12       | N                                                             | 1                   |                  |                                  |                  | Qnr-S1     |
| ecloacae    | MGH_12       | N                                                             | 2                   | pHCM2            | AL513384.1                       | IncFIB(pHCM2)    | dfrA15     |
| ecloacae    | MGH_12       | N                                                             | 2                   | pHCM2            | AL513384.1                       | IncFIB(pHCM2)    | sul1       |
| ecloacae    | MGH_12       | N                                                             | 3                   | pBK31551         | JX193301.1                       | IncN             | aac(3)-Ib  |
| ecloacae    | MGH_12       | N                                                             | 3                   | pBK31551         | JX193301.1                       | IncN             | aph(3)-Ia  |
| ecloacae    | MGH_12       | N                                                             | 3                   | pBK31551         | JX193301.1                       | IncN             | blaKPC-4   |
| ecloacae    | MGH_12       | N                                                             | 3                   | pBK31551         | JX193301.1                       | IncN             | blaTEM-1   |
| ecloacae    | MGH_12       | N                                                             | 3                   | pBK31551         | JX193301.1                       | IncN             | dfrA14     |
| ecoli       | BIDMC_39     | S                                                             | 1                   |                  |                                  | IncFIB(K)        | aac(3)-VIa |
| ecoli       | BIDMC_39     | S                                                             | 1                   |                  |                                  | IncFIB(K)        | aadA1      |
| ecoli       | BIDMC_39     | S                                                             | 1                   |                  |                                  | IncFIB(K)        | blaHERA-3  |
| ecoli       | BIDMC_39     | S                                                             | 1                   |                  |                                  | IncFIB(K)        | strA       |
| ecoli       | BIDMC_39     | S                                                             | 1                   |                  |                                  | IncFIB(K)        | strB       |
| ecoli       | BIDMC_39     | S                                                             | 1                   |                  |                                  | IncFIB(K)        | sul1       |

Table S16. Number of substitutions between ST258 isolates when accounting recombination free regions

|           | BIDMC_1 | BIDMC_10 | BIDMC_12A | BIDMC_12B | BIDMC_12C | BIDMC_13 | BIDMC_14 | BIDMC_16 | BIDMC_18A | BIDMC_18B | BIDMC_18C | BIDMC_2A | BIDMC_32 | BIDMC_34 | BIDMC_4 | BIDMC_42A | BIDMC_42B | BIDMC_45 | BIDMC_5 | BIDMC_54 | BIDMC_60 | BIDMC_68 | BIDMC_7A | BIDMC_7B | BWH_22 | BWH_36 | BWH_45 | BWH_47 | MGH_29 | MGH_31 | MGH_51 | MGH_59 | MGH_67 | MGH_71 | MGH_73 | MGH_79 | UCI_1 | UCI_13 | UCI_17 | UCI_19 | UCI_21 | UCI_33 | UCI_37 | UCI_41 | UCI_55 | UCI_59 | UCI_61 | UCI_63 | UCI_67 |  |
|-----------|---------|----------|-----------|-----------|-----------|----------|----------|----------|-----------|-----------|-----------|----------|----------|----------|---------|-----------|-----------|----------|---------|----------|----------|----------|----------|----------|--------|--------|--------|--------|--------|--------|--------|--------|--------|--------|--------|--------|-------|--------|--------|--------|--------|--------|--------|--------|--------|--------|--------|--------|--------|--|
| BIDMC_1   |         | 129      | 155       | 133       | 152       | 142      | 131      | 127      | 178       | 171       | 167       | 120      | 151      | 188      | 127     | 153       | 159       | 178      | 136     | 142      | 120      | 124      | 141      | 137      | 158    | 163    | 123    | 155    | 184    | 146    | 148    | 70     | 107    | 145    | 134    | 135    | 142   | 233    | 136    | 201    | 225    | 132    | 244    | 182    | 189    | 232    | 156    | 206    | 155    |  |
| BIDMC_10  | 129     |          | 96        | 75        | 96        | 55       | 110      | 36       | 145       | 144       | 137       | 35       | 50       | 146      | 39      | 58        | 56        | 147      | 41      | 55       | 96       | 99       | 50       | 60       | 131    | 74     | 99     | 131    | 144    | 106    | 126    | 144    | 88     | 120    | 108    | 109    | 81    | 188    | 115    | 166    | 184    | 104    | 200    | 143    | 140    | 191    | 126    | 165    | 95     |  |
| BIDMC_12A | 155     | 96       |           | 23        | 6         | 101      | 144      | 94       | 170       | 170       | 163       | 91       | 107      | 176      | 96      | 118       | 123       | 166      | 94      | 115      | 123      | 126      | 110      | 111      | 149    | 126    | 127    | 158    | 174    | 143    | 145    | 168    | 111    | 138    | 137    | 138    | 99    | 218    | 132    | 187    | 214    | 124    | 234    | 182    | 177    | 219    | 145    | 493    | 108    |  |
| BIDMC_12B | 133     | 75       | 23        |           | 20        | 80       | 124      | 75       | 151       | 151       | 141       | 72       | 81       | 160      | 74      | 98        | 96        | 153      | 70      | 93       | 103      | 106      | 84       | 95       | 129    | 92     | 110    | 141    | 154    | 119    | 127    | 151    | 93     | 126    | 119    | 121    | 81    | 199    | 121    | 171    | 195    | 110    | 221    | 168    | 161    | 199    | 131    | 174    | 90     |  |
| BIDMC_12C | 152     | 96       | 6         | 20        |           | 104      | 141      | 91       | 167       | 170       | 159       | 91       | 110      | 173      | 93      | 114       | 119       | 166      | 97      | 112      | 120      | 122      | 107      | 108      | 146    | 123    | 126    | 157    | 170    | 140    | 145    | 169    | 110    | 138    | 136    | 139    | 96    | 216    | 128    | 184    | 212    | 124    | 237    | 185    | 178    | 216    | 144    | 191    | 105    |  |
| BIDMC_13  | 142     | 55       | 101       | 80        | 104       |          | 125      | 31       | 152       | 151       | 144       | 23       | 33       | 158      | 38      | 76        | 74        | 150      | 26      | 65       | 106      | 108      | 59       | 72       | 134    | 66     | 116    | 142    | 150    | 104    | 130    | 121    | 114    | 90     | 197    | 137    | 171   | 197    | 113    | 211    | 164    | 154    | 196    | 127    | 171    | 104    |        |        |        |  |
| BIDMC_14  | 131     | 110      | 144       | 124       | 141       | 125      |          | 105      | 153       | 153       | 145       | 112      | 126      | 163      | 117     | 133       | 135       | 160      | 116     | 134      | 95       | 98       | 126      | 131      | 138    | 146    | 54     | 31     | 152    | 114    | 134    | 157    | 86     | 129    | 7      | 108    | 130   | 206    | 123    | 174    | 197    | 118    | 212    | 161    | 149    | 207    | 142    | 181    | 138    |  |
| BIDMC_16  | 127     | 36       | 94        | 75        | 91        | 31       | 105      |          | 140       | 138       | 132       | 8        | 31       | 154      | 18      | 63        | 56        | 146      | 24      | 49       | 89       | 91       | 53       | 54       | 128    | 68     | 94     | 122    | 140    | 104    | 117    | 135    | 80     | 114    | 101    | 104    | 77    | 187    | 117    | 158    | 182    | 95     | 207    | 150    | 136    | 182    | 119    | 160    | 90     |  |
| BIDMC_18A | 178     | 145      | 170       | 151       | 167       | 152      | 153      | 140      |           | 29        | 16        | 135      | 165      | 29       | 142     | 163       | 167       | 23       | 149     | 153      | 116      | 118      | 168      | 156      | 121    | 172    | 143    | 168    | 42     | 164    | 124    | 197    | 99     | 118    | 150    | 145    | 160   | 192    | 161    | 165    | 194    | 146    | 261    | 205    | 203    | 192    | 173    | 167    | 169    |  |
| BIDMC_18B | 171     | 144      | 170       | 151       | 170       | 151      | 153      | 138      | 29        |           | 22        | 135      | 164      | 43       | 142     | 166       | 168       | 38       | 148     | 153      | 113      | 113      | 164      | 159      | 114    | 178    | 143    | 168    | 45     | 166    | 115    | 190    | 102    | 117    | 147    | 147    | 159   | 184    | 166    | 153    | 186    | 146    | 255    | 199    | 199    | 180    | 167    | 156    | 169    |  |
| BIDMC_18C | 167     | 137      | 163       | 141       | 159       | 144      | 145      | 132      | 16        | 22        |           | 125      | 157      | 28       | 132     | 155       | 158       | 21       | 141     | 146      | 107      | 108      | 154      | 149      | 108    | 168    | 135    | 160    | 34     | 159    | 107    | 183    | 97     | 110    | 142    | 142    | 149   | 178    | 153    | 150    | 180    | 139    | 255    | 197    | 196    | 177    | 162    | 150    | 159    |  |
| BIDMC_2A  | 120     | 35       | 91        | 72        | 91        | 23       | 112      | 8        | 135       | 135       | 125       |          | 30       | 145      | 4       | 55        | 60        | 144      | 21      | 45       | 89       | 91       | 51       | 56       | 126    | 74     | 93     | 129    | 143    | 105    | 115    | 139    | 80     | 110    | 106    | 101    | 76    | 185    | 117    | 157    | 182    | 100    | 199    | 147    | 140    | 184    | 120    | 160    | 86     |  |
| BIDMC_32  | 151     | 50       | 107       | 81        | 110       | 33       | 126      | 31       | 165       | 164       | 157       | 30       |          | 175      | 43      | 78        | 71        | 162      | 28      | 73       | 117      | 119      | 65       | 72       | 145    | 69     | 110    | 143    | 161    | 112    | 144    | 158    | 103    | 131    | 122    | 125    | 97    | 200    | 132    | 179    | 199    | 117    | 221    | 166    | 158    | 206    | 139    | 180    | 110    |  |
| BIDMC_34  | 188     | 146      | 176       | 160       | 173       | 158      | 163      | 154      | 29        | 43        | 28        | 145      | 175      |          | 155     | 174       | 170       | 19       | 159     | 169      | 128      | 131      | 159      | 169      | 108    | 177    | 156    | 178    | 47     | 171    | 126    | 197    | 116    | 125    | 160    | 160    | 168   | 190    | 164    | 170    | 191    | 153    | 265    | 208    | 212    | 197    | 177    | 170    | 178    |  |
| BIDMC_4   | 127     | 39       | 96        | 74        | 93        | 38       | 117      | 18       | 142       | 142       | 132       | 14       | 43       | 155      |         | 59        | 64        | 150      | 30      | 50       | 93       | 95       | 54       | 58       | 132    | 76     | 101    | 134    | 150    | 111    | 121    | 145    | 84     | 116    | 113    | 106    | 79    | 191    | 122    | 163    | 189    | 104    | 213    | 156    | 148    | 191    | 124    | 166    | 89     |  |
| BIDMC_42A | 153     | 58       | 118       | 98        | 114       | 76       | 133      | 63       | 163       | 166       | 155       | 55       | 78       | 174      | 59      |           | 29        | 165      | 71      | 37       | 122      | 120      | 25       | 32       | 146    | 46     | 132    | 156    | 159    | 137    | 147    | 171    | 106    | 137    | 134    | 133    | 105   | 211    | 135    | 186    | 209    | 124    | 230    | 170    | 170    | 212    | 143    | 190    | 116    |  |
| BIDMC_42B | 159     | 56       | 123       | 96        | 119       | 74       | 135      | 56       | 167       | 168       | 158       | 60       | 71       | 170      | 64      | 29        |           | 165      | 61      | 47       | 126      | 127      | 29       | 38       | 142    | 42     | 128    | 157    | 161    | 133    | 147    | 168    | 117    | 129    | 136    | 138    | 104   | 208    | 131    | 184    | 202    | 127    | 230    | 175    | 170    | 211    | 144    | 186    | 114    |  |
| BIDMC_45  | 178     | 147      | 166       | 153       | 166       | 150      | 160      | 146      | 23        | 38        | 21        | 144      | 162      | 19       | 150     | 165       | 165       |          | 150     | 159      | 120      | 121      | 155      | 158      | 118    | 173    | 146    | 173    | 48     | 175    | 121    | 206    | 107    | 122    | 152    | 155    | 163   | 199    | 162    | 172    | 195    | 151    | 261    | 206    | 203    | 192    | 180    | 172    | 173    |  |
| BIDMC_5   | 136     | 41       | 94        | 70        | 97        | 26       | 116      | 24       | 149       | 148       | 141       | 21       | 28       | 159      | 30      | 71        | 61        | 150      |         | 60       | 103      | 105      | 62       | 64       | 127    | 55     | 106    | 135    | 153    | 105    | 125    | 146    | 91     | 122    | 114    | 112    | 89    | 195    | 127    | 171    | 188    | 105    | 211    | 159    | 150    | 196    | 130    | 173    | 102    |  |
| BIDMC_54  | 142     | 55       | 115       | 93        | 112       | 65       | 134      | 49       | 153       | 153       | 146       | 45       | 73       | 169      | 50      | 37        | 47        | 159      | 60      |          | 106      | 107      | 48       | 43       | 146    | 60     | 117    | 151    | 163    | 125    | 136    | 160    | 98     | 130    | 127    | 120    | 99    | 206    | 133    | 179    | 201    | 120    | 222    | 162    | 158    | 206    | 138    | 182    | 106    |  |
| BIDMC_60  | 120     | 96       | 123       | 103       | 120       | 106      | 95       | 89       | 116       | 113       | 107       | 89       | 117      | 128      | 93      | 122       | 126       | 120      | 103     | 106      |          | 13       | 120      | 112      | 103    | 130    | 89     | 117    | 120    | 103    | 95     | 141    | 37     | 93     | 98     | 85     | 106   | 171    | 117    | 136    | 165    | 96     | 213    | 152    | 148    | 170    | 117    | 146    | 114    |  |
| BIDMC_68  | 124     | 99       | 126       | 106       | 122       | 108      | 98       | 91       | 118       | 113       | 108       | 91       | 119      | 131      | 95      | 120       | 127       | 121      | 105     | 107      | 13       |          | 122      | 114      | 103    | 133    | 91     | 120    | 110    | 107    | 98     | 145    | 34     | 92     | 101    | 90     | 109   | 175    | 120    | 140    | 169    | 98     | 201    | 148    | 147    | 173    | 120    | 150    | 116    |  |
| BIDMC_7A  | 141     | 50       | 110       | 84        | 107       | 59       | 126      | 53       | 168       | 164       | 154       | 51       | 65       | 159      | 54      | 25        | 29        | 155      | 62      | 48       | 120      | 122      |          | 24       | 138    | 36     | 121    | 153    | 157    | 119    | 152    | 160    | 111    | 127    | 131    | 133    | 93    | 209    | 129    | 183    | 207    | 126    | 221    | 170    | 166    | 214    | 140    | 181    | 114    |  |
| BIDMC_7B  | 137     | 60       | 111       | 95        | 108       | 72       | 131      | 54       | 156       | 159       | 149       | 56       | 72       | 169      | 58      | 32        | 38        | 158      | 64      | 43       | 112      | 114      | 24       |          | 138    | 38     | 126    | 152    | 154    | 126    | 142    | 160    | 100    | 134    | 133    | 121    | 98    | 208    | 133    | 185    | 205    | 127    | 231    | 177    | 168    | 208    | 141    | 180    | 112    |  |
| BWH_22    | 158     | 131      | 149       | 129       | 146       | 134      | 138      | 128      | 121       | 114       | 108       | 126      | 145      | 108      | 132     | 146       | 142       | 118      | 127     | 146      | 103      | 138      | 138      |          | 140    | 131    | 153    | 114    | 145    | 140    | 175    | 95     | 99     | 136    | 139    | 145    | 161   | 140    | 135    | 153    | 133    | 243    | 187    | 186    | 166    | 155    | 140    | 155    |        |  |
| BWH_36    | 163     | 74       | 126       | 92        | 123       | 66       | 146      | 68       | 172       | 178       | 168       | 74       | 69       | 177      | 76      | 46        | 42        | 173      | 55      | 60       | 130      | 133      | 36       | 38       | 140    |        | 133    | 163    | 166    | 122    | 157    | 174    | 118    | 137    | 139    | 143    | 117   | 213    | 141    | 195    | 210    | 140    | 227    | 180    | 175    | 218    | 151    | 193    | 129    |  |
| BWH_45    | 123     | 99       | 127       | 110       | 126       | 116      | 54       | 94       | 143       | 143       | 135       | 93       | 110      | 156      | 101     | 132       | 128       | 146      | 106     | 117      | 89       | 91       | 121      | 126      | 131    | 133    |        | 75     | 148    | 112    | 121    | 144    | 75     | 116    | 60     | 102    | 116   | 198    | 125    | 164    | 193    | 97     | 207    | 157    | 146    | 196    | 126    | 173    | 122    |  |
| BWH_47    | 155     | 131      | 158       | 141       | 157       | 142      | 31       | 122      | 168       | 168       | 160       | 129      | 143      | 178      | 134     | 156       | 157       | 173      | 135     | 151      | 117      | 120      | 153      | 152      | 153    | 163    | 75     |        | 168    | 134    | 149    | 125    | 146    |        |        |        |       |        |        |        |        |        |        |        |        |        |        |        |        |  |
| MGH_29    | 184     | 144      | 174       | 154       | 170       | 150      | 152      | 140      | 42        | 45        | 34        | 143      | 161      | 47       | 150     | 159       | 161       | 48       | 153     | 163      | 120      | 119      | 157      | 154      | 114    | 166    | 148    | 168    |        | 168    | 125    | 196    | 111    | 116    | 153    | 149    | 162   | 190    | 167    | 161    | 188    | 153    | 257    | 203    | 203    | 188    | 177    | 161    | 171    |  |
| MGH_31    | 146     | 106      | 143       | 119       | 140       | 104      | 114      | 104      | 164       | 166       | 159       | 105      | 112      | 171      | 111     | 137       | 133       | 175      | 105     | 125      | 103      | 107      | 119      | 126      | 145    | 122    | 112    | 134    | 168    |        | 146    | 167    | 95     | 147    | 118    | 110    | 130   | 211    | 146    | 189    | 211    | 110    | 235    | 174    | 168    | 216    | 141    | 190    | 139    |  |
| MGH_51    | 148     | 126      | 145       | 127       | 145       | 130      |          |          |           |           |           |          |          |          |         |           |           |          |         |          |          |          |          |          |        |        |        |        |        |        |        |        |        |        |        |        |       |        |        |        |        |        |        |        |        |        |        |        |        |  |
